# Supplementary material
Source: PubMed Central journal article supplement (PMC7610982)
Supplement: EMS126982-supplement-Supplementary_Table2.pdf [file EMS126982-supplement-Supplementary_Table2.pdf]

| <b>HGNC symbols</b> | <b>gene description</b>                                                              | <b>1,045 Unique total protein-coding genes_ forming S-AS pairs with MIR-lncRNAs</b> |
|---------------------|--------------------------------------------------------------------------------------|-------------------------------------------------------------------------------------|
| 1 A1BG              | alpha-1-B glycoprotein [Source:HGNC Symbol;Acc:HGNC:5]                               |                                                                                     |
| 2 A3GALT2           | alpha 1,3-galactosyltransferase 2 [Source:HGNC Symbol;Acc:HGNC:30005]                |                                                                                     |
| 3 ABAT              | 4-aminobutyrate aminotransferase [Source:HGNC Symbol;Acc:HGNC:23]                    |                                                                                     |
| 4 ABCA9             | ATP binding cassette subfamily A member 9 [Source:HGNC Symbol;Acc:HGNC:39]           |                                                                                     |
| 5 ABCB9             | ATP binding cassette subfamily B member 9 [Source:HGNC Symbol;Acc:HGNC:50]           |                                                                                     |
| 6 ABHD2             | abhydrolase domain containing 2 [Source:HGNC Symbol;Acc:HGNC:18717]                  |                                                                                     |
| 7 ABHD4             | abhydrolase domain containing 4 [Source:HGNC Symbol;Acc:HGNC:20154]                  |                                                                                     |
| 8 ABLIM3            | actin binding LIM protein family member 3 [Source:HGNC Symbol;Acc:HGNC:29132]        |                                                                                     |
| 9 AC004466.1        | N/A                                                                                  |                                                                                     |
| 10 AC006116.20      | N/A                                                                                  |                                                                                     |
| 11 AC007040.11      | N/A                                                                                  |                                                                                     |
| 12 AC007461.1       | N/A                                                                                  |                                                                                     |
| 13 AC007557.1       | LOC101928327                                                                         |                                                                                     |
| 14 AC008443.1       | N/A                                                                                  |                                                                                     |
| 15 AC009892.10      | N/A                                                                                  |                                                                                     |
| 16 AC015989.2       | N/A                                                                                  |                                                                                     |
| 17 AC019294.1       | N/A                                                                                  |                                                                                     |
| 18 AC026369.1       | N/A                                                                                  |                                                                                     |
| 19 AC093157.1       | N/A                                                                                  |                                                                                     |
| 20 AC104809.3       | N/A                                                                                  |                                                                                     |
| 21 AC114494.1       | N/A                                                                                  |                                                                                     |
| 22 AC117834.1       | N/A                                                                                  |                                                                                     |
| 23 ACMSD            | aminocarboxymuconate semialdehyde decarboxylase [Source:HGNC Symbol;Acc:HGNC:19288]  |                                                                                     |
| 24 ACOT8            | acyl-CoA thioesterase 8 [Source:HGNC Symbol;Acc:HGNC:15919]                          |                                                                                     |
| 25 ACSBG2           | acyl-CoA synthetase bubblegum family member 2 [Source:HGNC Symbol;Acc:HGNC:24174]    |                                                                                     |
| 26 ACSM5            | acyl-CoA synthetase medium-chain family member 5 [Source:HGNC Symbol;Acc:HGNC:26060] |                                                                                     |
| 27 ACTC1            | actin, alpha, cardiac muscle 1 [Source:HGNC Symbol;Acc:HGNC:143]                     |                                                                                     |
| 28 ACTL10           | actin like 10 [Source:HGNC Symbol;Acc:HGNC:16127]                                    |                                                                                     |
| 29 ADAD2            | adenosine deaminase domain containing 2 [Source:HGNC Symbol;Acc:HGNC:30714]          |                                                                                     |

|    |            |                                                                                         |
|----|------------|-----------------------------------------------------------------------------------------|
| 30 | ADAM17     | ADAM metallopeptidase domain 17 [Source:HGNC Symbol;Acc:HGNC:195]                       |
| 31 | ADAMTSL4   | ADAMTS like 4 [Source:HGNC Symbol;Acc:HGNC:19706]                                       |
| 32 | ADAMTSL5   | ADAMTS like 5 [Source:HGNC Symbol;Acc:HGNC:27912]                                       |
| 33 | ADH1A      | alcohol dehydrogenase 1A (class I), alpha polypeptide [Source:HGNC Symbol;Acc:HGNC:249] |
| 34 | ADH6       | alcohol dehydrogenase 6 (class V) [Source:HGNC Symbol;Acc:HGNC:255]                     |
| 35 | ADIPOQ     | adiponectin, C1Q and collagen domain containing [Source:HGNC Symbol;Acc:HGNC:13633]     |
| 36 | ADIRF      | adipogenesis regulatory factor [Source:HGNC Symbol;Acc:HGNC:24043]                      |
| 37 | ADM5       | adrenomedullin 5 (putative) [Source:HGNC Symbol;Acc:HGNC:27293]                         |
| 38 | ADORA1     | adenosine A1 receptor [Source:HGNC Symbol;Acc:HGNC:262]                                 |
| 39 | ADORA2A    | adenosine A2a receptor [Source:HGNC Symbol;Acc:HGNC:263]                                |
| 40 | ADPGK      | ADP dependent glucokinase [Source:HGNC Symbol;Acc:HGNC:25250]                           |
| 41 | ADPRH      | ADP-ribosylarginine hydrolase [Source:HGNC Symbol;Acc:HGNC:269]                         |
| 42 | AFAP1      | actin filament associated protein 1 [Source:HGNC Symbol;Acc:HGNC:24017]                 |
| 43 | AGK        | acylglycerol kinase [Source:HGNC Symbol;Acc:HGNC:21869]                                 |
| 44 | AGPS       | alkylglycerone phosphate synthase [Source:HGNC Symbol;Acc:HGNC:327]                     |
| 45 | AHI1       | Abelson helper integration site 1 [Source:HGNC Symbol;Acc:HGNC:21575]                   |
| 46 | AHR        | aryl hydrocarbon receptor [Source:HGNC Symbol;Acc:HGNC:348]                             |
| 47 | AKAP13     | A-kinase anchoring protein 13 [Source:HGNC Symbol;Acc:HGNC:371]                         |
| 48 | AL117190.2 | N/A                                                                                     |
| 49 | ALDH1L1    | aldehyde dehydrogenase 1 family member L1 [Source:HGNC Symbol;Acc:HGNC:3978]            |
| 50 | ALG10      | ALG10, alpha-1,2-glucosyltransferase [Source:HGNC Symbol;Acc:HGNC:23162]                |
| 51 | ALKBH5     | alkB homolog 5, RNA demethylase [Source:HGNC Symbol;Acc:HGNC:25996]                     |
| 52 | ANAPC5     | anaphase promoting complex subunit 5 [Source:HGNC Symbol;Acc:HGNC:15713]                |
| 53 | ANGPT2     | angiopoietin 2 [Source:HGNC Symbol;Acc:HGNC:485]                                        |
| 54 | ANK1       | ankyrin 1 [Source:HGNC Symbol;Acc:HGNC:492]                                             |
| 55 | ANKEF1     | ankyrin repeat and EF-hand domain containing 1 [Source:HGNC Symbol;Acc:HGNC:15803]      |
| 56 | ANKRD42    | ankyrin repeat domain 42 [Source:HGNC Symbol;Acc:HGNC:26752]                            |
| 57 | ANKRD6     | ankyrin repeat domain 6 [Source:HGNC Symbol;Acc:HGNC:17280]                             |
| 58 | ANKRD66    | ankyrin repeat domain 66 [Source:HGNC Symbol;Acc:HGNC:44669]                            |
| 59 | AP1G2      | adaptor related protein complex 1 gamma 2 subunit [Source:HGNC Symbol;Acc:HGNC:556]     |

|    |          |                                                                                                                 |
|----|----------|-----------------------------------------------------------------------------------------------------------------|
| 60 | AP3S1    | adaptor related protein complex 3 sigma 1 subunit [Source:HGNC Symbol;Acc:HGNC:2013]                            |
| 61 | APOM     | apolipoprotein M [Source:HGNC Symbol;Acc:HGNC:13916]                                                            |
| 62 | APP      | amyloid beta precursor protein [Source:HGNC Symbol;Acc:HGNC:620]                                                |
| 63 | AQP2     | aquaporin 2 [Source:HGNC Symbol;Acc:HGNC:634]                                                                   |
| 64 | AQP9     | aquaporin 9 [Source:HGNC Symbol;Acc:HGNC:643]                                                                   |
| 65 | ARAP1    | ArfGAP with RhoGAP domain, ankyrin repeat and PH domain 1 [Source:HGNC Symbol;Acc:HGNC:16925]                   |
| 66 | ARF5     | ADP ribosylation factor 5 [Source:HGNC Symbol;Acc:HGNC:658]                                                     |
| 67 | ARHGAP28 | Rho GTPase activating protein 28 [Source:HGNC Symbol;Acc:HGNC:25509]                                            |
| 68 | ARHGAP5  | Rho GTPase activating protein 5 [Source:HGNC Symbol;Acc:HGNC:675]                                               |
| 69 | ARHGEF15 | Rho guanine nucleotide exchange factor 15 [Source:HGNC Symbol;Acc:HGNC:15590]                                   |
| 70 | ARHGEF26 | Rho guanine nucleotide exchange factor 26 [Source:HGNC Symbol;Acc:HGNC:24490]                                   |
| 71 | ARHGEF3  | Rho guanine nucleotide exchange factor 3 [Source:HGNC Symbol;Acc:HGNC:683]                                      |
| 72 | ARHGEF35 | Rho guanine nucleotide exchange factor 35 [Source:HGNC Symbol;Acc:HGNC:33846]                                   |
| 73 | ARIH1    | ariadne RBR E3 ubiquitin protein ligase 1 [Source:HGNC Symbol;Acc:HGNC:689]                                     |
| 74 | ARNT2    | aryl hydrocarbon receptor nuclear translocator 2 [Source:HGNC Symbol;Acc:HGNC:16876]                            |
| 75 | ART4     | ADP-ribosyltransferase 4 (Dombrock blood group) [Source:HGNC Symbol;Acc:HGNC:726]                               |
| 76 | ASB16    | ankyrin repeat and SOCS box containing 16 [Source:HGNC Symbol;Acc:HGNC:19768]                                   |
| 77 | ASB7     | ankyrin repeat and SOCS box containing 7 [Source:HGNC Symbol;Acc:HGNC:17182]                                    |
| 78 | ASCL1    | achaete-scute family bHLH transcription factor 1 [Source:HGNC Symbol;Acc:HGNC:738]                              |
| 79 | ASH1L    | ASH1 like histone lysine methyltransferase [Source:HGNC Symbol;Acc:HGNC:19088]                                  |
| 80 | ATE1     | arginyltransferase 1 [Source:HGNC Symbol;Acc:HGNC:782]                                                          |
| 81 | ATF5     | activating transcription factor 5 [Source:HGNC Symbol;Acc:HGNC:790]                                             |
| 82 | ATL3     | atlastin GTPase 3 [Source:HGNC Symbol;Acc:HGNC:24526]                                                           |
| 83 | ATP13A2  | ATPase 13A2 [Source:HGNC Symbol;Acc:HGNC:30213]                                                                 |
| 84 | ATP13A3  | ATPase 13A3 [Source:HGNC Symbol;Acc:HGNC:24113]                                                                 |
|    | ATP5H    | ATP synthase, H <sup>+</sup> transporting, mitochondrial Fo complex subunit D [Source:HGNC Symbol;Acc:HGNC:845] |
| 85 |          |                                                                                                                 |
|    | ATP5L    | ATP synthase, H <sup>+</sup> transporting, mitochondrial Fo complex subunit G [Source:HGNC                      |
| 86 |          | Symbol;Acc:HGNC:14247]                                                                                          |

|                |                                                                                                                  |
|----------------|------------------------------------------------------------------------------------------------------------------|
| ATP5O          | ATP synthase, H <sup>+</sup> transporting, mitochondrial F1 complex, O subunit [Source:HGNC Symbol;Acc:HGNC:850] |
| 87             |                                                                                                                  |
| 88 ATP6V0E2    | ATPase H <sup>+</sup> transporting V0 subunit e2 [Source:HGNC Symbol;Acc:HGNC:21723]                             |
| 89 ATP6V1C1    | ATPase H <sup>+</sup> transporting V1 subunit C1 [Source:HGNC Symbol;Acc:HGNC:856]                               |
| 90 AZIN1       | antizyme inhibitor 1 [Source:HGNC Symbol;Acc:HGNC:16432]                                                         |
| 91 B4GALT6     | beta-1,4-galactosyltransferase 6 [Source:HGNC Symbol;Acc:HGNC:929]                                               |
| 92 B9D1        | B9 domain containing 1 [Source:HGNC Symbol;Acc:HGNC:24123]                                                       |
| 93 BCAN        | brevican [Source:HGNC Symbol;Acc:HGNC:23059]                                                                     |
| 94 BCAR3       | breast cancer anti-estrogen resistance 3 [Source:HGNC Symbol;Acc:HGNC:973]                                       |
| 95 BCL2L2      | BCL2L2-PABPN1 readthrough [Source:HGNC Symbol;Acc:HGNC:42959]                                                    |
| 95 BCL2L2      | BCL2 like 2 [Source:HGNC Symbol;Acc:HGNC:995]                                                                    |
| 96 BCL7C       | BCL tumor suppressor 7C [Source:HGNC Symbol;Acc:HGNC:1006]                                                       |
| 97 BDNF        | brain derived neurotrophic factor [Source:HGNC Symbol;Acc:HGNC:1033]                                             |
| 98 BEAN1       | brain expressed, associated with NEDD4, 1 [Source:HGNC Symbol;Acc:HGNC:24160]                                    |
| 99 BEGAIN      | brain enriched guanylate kinase associated [Source:HGNC Symbol;Acc:HGNC:24163]                                   |
| 100 BLNK       | B-cell linker [Source:HGNC Symbol;Acc:HGNC:14211]                                                                |
| 101 BMP8A      | bone morphogenetic protein 8a [Source:HGNC Symbol;Acc:HGNC:21650]                                                |
| 102 BPI        | bactericidal/permeability-increasing protein [Source:HGNC Symbol;Acc:HGNC:1095]                                  |
| 103 BRD7       | bromodomain containing 7 [Source:HGNC Symbol;Acc:HGNC:14310]                                                     |
| 104 BTBD3      | BTB domain containing 3 [Source:HGNC Symbol;Acc:HGNC:15854]                                                      |
| 105 BTG1       | BTG anti-proliferation factor 1 [Source:HGNC Symbol;Acc:HGNC:1130]                                               |
| 106 BVES       | blood vessel epicardial substance [Source:HGNC Symbol;Acc:HGNC:1152]                                             |
| 107 BX088651.1 | N/A                                                                                                              |
| 108 BZRAP1     | TSPO associated protein 1 [Source:HGNC Symbol;Acc:HGNC:16831]                                                    |
| 109 C10ORF105  | chromosome 10 open reading frame 105 [Source:HGNC Symbol;Acc:HGNC:20304]                                         |
| 110 C10ORF131  | coiled-coil and C2 domain containing 2B [Source:HGNC Symbol;Acc:HGNC:31666]                                      |
| 111 C10ORF88   | chromosome 10 open reading frame 88 [Source:HGNC Symbol;Acc:HGNC:25822]                                          |
| 112 C11ORF57   | chromosome 11 open reading frame 57 [Source:HGNC Symbol;Acc:HGNC:25569]                                          |
| 113 C11ORF72   | chromosome 11 open reading frame 72 [Source:HGNC Symbol;Acc:HGNC:26915]                                          |
| 114 C15ORF27   | transmembrane protein 266 [Source:HGNC Symbol;Acc:HGNC:26763]                                                    |

115 C15ORF39 chromosome 15 open reading frame 39 [Source:HGNC Symbol;Acc:HGNC:24497]  
116 C15ORF61 chromosome 15 open reading frame 61 [Source:HGNC Symbol;Acc:HGNC:34453]  
117 C16ORF52 chromosome 16 open reading frame 52 [Source:HGNC Symbol;Acc:HGNC:27087]  
118 C16ORF58 chromosome 16 open reading frame 58 [Source:HGNC Symbol;Acc:HGNC:25848]  
119 C17ORF78 chromosome 17 open reading frame 78 [Source:HGNC Symbol;Acc:HGNC:26831]  
120 C19ORF66 chromosome 19 open reading frame 66 [Source:HGNC Symbol;Acc:HGNC:25649]  
121 C19ORF68 chromosome 19 open reading frame 68 [Source:HGNC Symbol;Acc:HGNC:34495]  
122 C1ORF167 N/A  
123 C1ORF173 N/A  
124 C1QTNF6 C1q and tumor necrosis factor related protein 6 [Source:HGNC Symbol;Acc:HGNC:14343]  
125 C1RL complement C1r subcomponent like [Source:HGNC Symbol;Acc:HGNC:21265]  
126 C20ORF144 chromosome 20 open reading frame 144 [Source:HGNC Symbol;Acc:HGNC:16137]  
127 C21ORF2 chromosome 21 open reading frame 2 [Source:HGNC Symbol;Acc:HGNC:1260]  
128 C2ORF49 chromosome 2 open reading frame 49 [Source:HGNC Symbol;Acc:HGNC:28772]  
129 C3ORF67 chromosome 3 open reading frame 67 [Source:HGNC Symbol;Acc:HGNC:24763]  
130 C4ORF19 chromosome 4 open reading frame 19 [Source:HGNC Symbol;Acc:HGNC:25618]  
131 C5ORF56 N/A  
132 C6ORF106 chromosome 6 open reading frame 106 [Source:HGNC Symbol;Acc:HGNC:21215]  
133 C8ORF56 N/A  
134 C9ORF117 cilia and flagella associated protein 157 [Source:HGNC Symbol;Acc:HGNC:27843]  
135 C9ORF9 sperm acrosome associated 9 [Source:HGNC Symbol;Acc:HGNC:1367]  
136 CA11 carbonic anhydrase 11 [Source:HGNC Symbol;Acc:HGNC:1370]  
137 CA7 carbonic anhydrase 7 [Source:HGNC Symbol;Acc:HGNC:1381]  
138 CACNA1C calcium voltage-gated channel subunit alpha1 C [Source:HGNC Symbol;Acc:HGNC:1390]  
139 CACNA2D3 calcium voltage-gated channel auxiliary subunit alpha2delta 3 [Source:HGNC Symbol;Acc:HGNC:15460]  
140 CACTIN cactin, spliceosome C complex subunit [Source:HGNC Symbol;Acc:HGNC:29938]  
141 CALHM2 calcium homeostasis modulator 2 [Source:HGNC Symbol;Acc:HGNC:23493]  
142 CALML3 calmodulin like 3 [Source:HGNC Symbol;Acc:HGNC:1452]  
143 CAMK2G calcium/calmodulin dependent protein kinase II gamma [Source:HGNC Symbol;Acc:HGNC:1463]  
144 CAPZA1 capping actin protein of muscle Z-line alpha subunit 1 [Source:HGNC Symbol;Acc:HGNC:1488]

145 CARD14 caspase recruitment domain family member 14 [Source:HGNC Symbol;Acc:HGNC:16446]  
146 CARHSP1 calcium regulated heat stable protein 1 [Source:HGNC Symbol;Acc:HGNC:17150]  
147 CAV2 caveolin 2 [Source:HGNC Symbol;Acc:HGNC:1528]  
148 CBFA2T3 CBFA2/RUNX1 translocation partner 3 [Source:HGNC Symbol;Acc:HGNC:1537]  
149 CBLL1 Cbl proto-oncogene like 1 [Source:HGNC Symbol;Acc:HGNC:21225]  
150 CC2D2B coiled-coil and C2 domain containing 2B [Source:HGNC Symbol;Acc:HGNC:31666]  
151 CCDC103 coiled-coil domain containing 103 [Source:HGNC Symbol;Acc:HGNC:32700]  
152 CCDC13 coiled-coil domain containing 13 [Source:HGNC Symbol;Acc:HGNC:26358]  
153 CCDC148 coiled-coil domain containing 148 [Source:HGNC Symbol;Acc:HGNC:25191]  
154 CCDC157 coiled-coil domain containing 157 [Source:HGNC Symbol;Acc:HGNC:33854]  
155 CCDC166 coiled-coil domain containing 166 [Source:HGNC Symbol;Acc:HGNC:41910]  
156 CCDC178 coiled-coil domain containing 178 [Source:HGNC Symbol;Acc:HGNC:29588]  
157 CCDC18 coiled-coil domain containing 18 [Source:HGNC Symbol;Acc:HGNC:30370]  
158 CCDC28B coiled-coil domain containing 28B [Source:HGNC Symbol;Acc:HGNC:28163]  
159 CCDC64B BICD family like cargo adaptor 2 [Source:HGNC Symbol;Acc:HGNC:33584]  
160 CCDC85A coiled-coil domain containing 85A [Source:HGNC Symbol;Acc:HGNC:29400]  
161 CCDC86 coiled-coil domain containing 86 [Source:HGNC Symbol;Acc:HGNC:28359]  
162 CCDC88A coiled-coil domain containing 88A [Source:HGNC Symbol;Acc:HGNC:25523]  
163 CCDC93 coiled-coil domain containing 93 [Source:HGNC Symbol;Acc:HGNC:25611]  
164 CCND1 cyclin D1 [Source:HGNC Symbol;Acc:HGNC:1582]  
165 CCNF cyclin F [Source:HGNC Symbol;Acc:HGNC:1591]  
166 CCT5 chaperonin containing TCP1 subunit 5 [Source:HGNC Symbol;Acc:HGNC:1618]  
167 CCT6B chaperonin containing TCP1 subunit 6B [Source:HGNC Symbol;Acc:HGNC:1621]  
168 CD48 CD48 molecule [Source:HGNC Symbol;Acc:HGNC:1683]  
169 CD82 CD82 molecule [Source:HGNC Symbol;Acc:HGNC:6210]  
170 CDK6 cyclin dependent kinase 6 [Source:HGNC Symbol;Acc:HGNC:1777]  
171 CDKN2A cyclin dependent kinase inhibitor 2A [Source:HGNC Symbol;Acc:HGNC:1787]  
172 CDON cell adhesion associated, oncogene regulated [Source:HGNC Symbol;Acc:HGNC:17104]  
173 CDSN corneodesmosin [Source:HGNC Symbol;Acc:HGNC:1802]  
174 CEACAM1 carcinoembryonic antigen related cell adhesion molecule 1 [Source:HGNC Symbol;Acc:HGNC:1814]

175 CEACAM16      carcinoembryonic antigen related cell adhesion molecule 16 [Source:HGNC Symbol;Acc:HGNC:31948]  
176 CEBPZ      CCAAT/enhancer binding protein zeta [Source:HGNC Symbol;Acc:HGNC:24218]  
177 CELF1      CUGBP, Elav-like family member 1 [Source:HGNC Symbol;Acc:HGNC:2549]  
178 CENPP      centromere protein P [Source:HGNC Symbol;Acc:HGNC:32933]  
179 CENPV      centromere protein V [Source:HGNC Symbol;Acc:HGNC:29920]  
180 CGNL1      cingulin like 1 [Source:HGNC Symbol;Acc:HGNC:25931]  
181 CHIA      chitinase, acidic [Source:HGNC Symbol;Acc:HGNC:17432]  
182 CHMP3      charged multivesicular body protein 3 [Source:HGNC Symbol;Acc:HGNC:29865]  
183 CHN2      chimerin 2 [Source:HGNC Symbol;Acc:HGNC:1944]  
184 CHPF2      chondroitin polymerizing factor 2 [Source:HGNC Symbol;Acc:HGNC:29270]  
185 CHRM1      cholinergic receptor muscarinic 1 [Source:HGNC Symbol;Acc:HGNC:1950]  
186 CHRNB2      cholinergic receptor nicotinic beta 2 subunit [Source:HGNC Symbol;Acc:HGNC:1962]  
187 CHTOP      chromatin target of PRMT1 [Source:HGNC Symbol;Acc:HGNC:24511]  
188 CIITA      class II major histocompatibility complex transactivator [Source:HGNC Symbol;Acc:HGNC:7067]  
189 CISH      cytokine inducible SH2 containing protein [Source:HGNC Symbol;Acc:HGNC:1984]  
190 CLDN14      claudin 14 [Source:HGNC Symbol;Acc:HGNC:2035]  
191 CLIP1      CAP-Gly domain containing linker protein 1 [Source:HGNC Symbol;Acc:HGNC:10461]  
192 CLUAP1      clusterin associated protein 1 [Source:HGNC Symbol;Acc:HGNC:19009]  
193 CLUH      clustered mitochondria homolog [Source:HGNC Symbol;Acc:HGNC:29094]  
194 CNIH2      cornichon family AMPA receptor auxiliary protein 2 [Source:HGNC Symbol;Acc:HGNC:28744]  
195 CNNM3      cyclin and CBS domain divalent metal cation transport mediator 3 [Source:HGNC Symbol;Acc:HGNC:104]  
196 CNOT2      CCR4-NOT transcription complex subunit 2 [Source:HGNC Symbol;Acc:HGNC:7878]  
197 COBL      cordon-bleu WH2 repeat protein [Source:HGNC Symbol;Acc:HGNC:22199]  
198 COCH      cochlin [Source:HGNC Symbol;Acc:HGNC:2180]  
199 COL15A1      collagen type XV alpha 1 chain [Source:HGNC Symbol;Acc:HGNC:2192]  
200 COL16A1      collagen type XVI alpha 1 chain [Source:HGNC Symbol;Acc:HGNC:2193]  
201 COL4A3      collagen type IV alpha 3 chain [Source:HGNC Symbol;Acc:HGNC:2204]  
202 COMMD1      copper metabolism domain containing 1 [Source:HGNC Symbol;Acc:HGNC:23024]  
203 COPA      coatomer protein complex subunit alpha [Source:HGNC Symbol;Acc:HGNC:2230]  
204 CPEB1      cytoplasmic polyadenylation element binding protein 1 [Source:HGNC Symbol;Acc:HGNC:21744]

205 CRAT carnitine O-acetyltransferase [Source:HGNC Symbol;Acc:HGNC:2342]  
206 CRHR2 corticotropin releasing hormone receptor 2 [Source:HGNC Symbol;Acc:HGNC:2358]  
207 CRLF3 cytokine receptor like factor 3 [Source:HGNC Symbol;Acc:HGNC:17177]  
208 CTBP1 C-terminal binding protein 1 [Source:HGNC Symbol;Acc:HGNC:2494]  
209 CTC-273B12.7 N/A  
210 CTD-3088G3.8 LOC400499  
211 CTNNA2 catenin alpha 2 [Source:HGNC Symbol;Acc:HGNC:2510]  
212 CTTN cortactin [Source:HGNC Symbol;Acc:HGNC:3338]  
213 CTTNBP2 cortactin binding protein 2 [Source:HGNC Symbol;Acc:HGNC:15679]  
214 CUL4A cullin 4A [Source:HGNC Symbol;Acc:HGNC:2554]  
215 CUL9 cullin 9 [Source:HGNC Symbol;Acc:HGNC:15982]  
216 CWF19L1 CWF19-like 1, cell cycle control (S. pombe) [Source:HGNC Symbol;Acc:HGNC:25613]  
217 CXCL14 C-X-C motif chemokine ligand 14 [Source:HGNC Symbol;Acc:HGNC:10640]  
218 CXORF40B chromosome X open reading frame 40B [Source:HGNC Symbol;Acc:HGNC:17402]  
219 CYGB cytoglobin [Source:HGNC Symbol;Acc:HGNC:16505]  
220 CYP11A1 cytochrome P450 family 11 subfamily A member 1 [Source:HGNC Symbol;Acc:HGNC:2590]  
221 CYP1B1 cytochrome P450 family 1 subfamily B member 1 [Source:HGNC Symbol;Acc:HGNC:2597]  
222 CYP2U1 cytochrome P450 family 2 subfamily U member 1 [Source:HGNC Symbol;Acc:HGNC:20582]  
223 CYP46A1 cytochrome P450 family 46 subfamily A member 1 [Source:HGNC Symbol;Acc:HGNC:2641]  
224 CYTH2 cytohesin 2 [Source:HGNC Symbol;Acc:HGNC:9502]  
225 DAAM2 dishevelled associated activator of morphogenesis 2 [Source:HGNC Symbol;Acc:HGNC:18143]  
226 DAGLA diacylglycerol lipase alpha [Source:HGNC Symbol;Acc:HGNC:1165]  
227 DAK triokinase and FMN cyclase [Source:HGNC Symbol;Acc:HGNC:24552]  
228 DAOA D-amino acid oxidase activator [Source:HGNC Symbol;Acc:HGNC:21191]  
229 DAPK2 death associated protein kinase 2 [Source:HGNC Symbol;Acc:HGNC:2675]  
230 DARS aspartyl-tRNA synthetase [Source:HGNC Symbol;Acc:HGNC:2678]  
231 DBH dopamine beta-hydroxylase [Source:HGNC Symbol;Acc:HGNC:2689]  
232 DBNDD2 dysbindin domain containing 2 [Source:HGNC Symbol;Acc:HGNC:15881]  
233 DCTN1 dynactin subunit 1 [Source:HGNC Symbol;Acc:HGNC:2711]  
234 DDN dendrin [Source:HGNC Symbol;Acc:HGNC:24458]



235 DDX11 DEAD/H-box helicase 11 [Source:HGNC Symbol;Acc:HGNC:2736]  
236 DDX20 DEAD-box helicase 20 [Source:HGNC Symbol;Acc:HGNC:2743]  
237 DDX27 DEAD-box helicase 27 [Source:HGNC Symbol;Acc:HGNC:15837]  
238 DEPTOR DEP domain containing MTOR-interacting protein [Source:HGNC Symbol;Acc:HGNC:22953]  
239 DERL1 derlin 1 [Source:HGNC Symbol;Acc:HGNC:28454]  
240 DGAT2 diacylglycerol O-acyltransferase 2 [Source:HGNC Symbol;Acc:HGNC:16940]  
241 DHCR24 24-dehydrocholesterol reductase [Source:HGNC Symbol;Acc:HGNC:2859]  
242 DHH desert hedgehog [Source:HGNC Symbol;Acc:HGNC:2865]  
243 DHRS13 dehydrogenase/reductase 13 [Source:HGNC Symbol;Acc:HGNC:28326]  
244 DHX57 DExH-box helicase 57 [Source:HGNC Symbol;Acc:HGNC:20086]  
245 DICER1 dicer 1, ribonuclease III [Source:HGNC Symbol;Acc:HGNC:17098]  
246 DKFZP434H0512 N/A  
247 DLG1 discs large MAGUK scaffold protein 1 [Source:HGNC Symbol;Acc:HGNC:2900]  
248 DLG2 discs large MAGUK scaffold protein 2 [Source:HGNC Symbol;Acc:HGNC:2901]  
249 DLGAP2 DLG associated protein 2 [Source:HGNC Symbol;Acc:HGNC:2906]  
250 DMTF1 cyclin D binding myb like transcription factor 1 [Source:HGNC Symbol;Acc:HGNC:14603]  
251 DNAJB13 DnaJ heat shock protein family (Hsp40) member B13 [Source:HGNC Symbol;Acc:HGNC:30718]  
252 DNAJB8 DnaJ heat shock protein family (Hsp40) member B8 [Source:HGNC Symbol;Acc:HGNC:23699]  
253 DNAJB9 DnaJ heat shock protein family (Hsp40) member B9 [Source:HGNC Symbol;Acc:HGNC:6968]  
254 DNAJC27 DnaJ heat shock protein family (Hsp40) member C27 [Source:HGNC Symbol;Acc:HGNC:30290]  
255 DNALI1 dynein axonemal light intermediate chain 1 [Source:HGNC Symbol;Acc:HGNC:14353]  
256 DND1 DND microRNA-mediated repression inhibitor 1 [Source:HGNC Symbol;Acc:HGNC:23799]  
257 DNPEP aspartyl aminopeptidase [Source:HGNC Symbol;Acc:HGNC:2981]  
258 DOK3 docking protein 3 [Source:HGNC Symbol;Acc:HGNC:24583]  
259 DPCR1 diffuse panbronchiolitis critical region 1 [Source:HGNC Symbol;Acc:HGNC:21666]  
260 DPM2 dolichyl-phosphate mannosyltransferase subunit 2, regulatory [Source:HGNC Symbol;Acc:HGNC:3006]  
261 DPP3 dipeptidyl peptidase 3 [Source:HGNC Symbol;Acc:HGNC:3008]  
262 DPP4 dipeptidyl peptidase 4 [Source:HGNC Symbol;Acc:HGNC:3009]  
263 DPP9 dipeptidyl peptidase 9 [Source:HGNC Symbol;Acc:HGNC:18648]  
264 DR1 down-regulator of transcription 1 [Source:HGNC Symbol;Acc:HGNC:3017]

265 DSC1 desmocollin 1 [Source:HGNC Symbol;Acc:HGNC:3035]  
266 DTNA dystrobrevin alpha [Source:HGNC Symbol;Acc:HGNC:3057]  
267 DYNC1LI2 dynein cytoplasmic 1 light intermediate chain 2 [Source:HGNC Symbol;Acc:HGNC:2966]  
268 DYNLRB2 dynein light chain roadblock-type 2 [Source:HGNC Symbol;Acc:HGNC:15467]  
269 EAF1 ELL associated factor 1 [Source:HGNC Symbol;Acc:HGNC:20907]  
270 ECE1 endothelin converting enzyme 1 [Source:HGNC Symbol;Acc:HGNC:3146]  
271 EDC3 enhancer of mRNA decapping 3 [Source:HGNC Symbol;Acc:HGNC:26114]  
272 EDNRB endothelin receptor type B [Source:HGNC Symbol;Acc:HGNC:3180]  
273 EFCAB14 EF-hand calcium binding domain 14 [Source:HGNC Symbol;Acc:HGNC:29051]  
274 EGR3 early growth response 3 [Source:HGNC Symbol;Acc:HGNC:3240]  
275 EIF2AK3 eukaryotic translation initiation factor 2 alpha kinase 3 [Source:HGNC Symbol;Acc:HGNC:3255]  
EIF4ENIF1 eukaryotic translation initiation factor 4E nuclear import factor 1 [Source:HGNC Symbol;Acc:HGNC:16687]  
276  
277 ELF3 E74 like ETS transcription factor 3 [Source:HGNC Symbol;Acc:HGNC:3318]  
ELFN2 extracellular leucine rich repeat and fibronectin type III domain containing 2 [Source:HGNC  
Symbol;Acc:HGNC:29396]  
278  
279 ELL2 elongation factor for RNA polymerase II 2 [Source:HGNC Symbol;Acc:HGNC:17064]  
280 ELN elastin [Source:HGNC Symbol;Acc:HGNC:3327]  
281 EMC3 ER membrane protein complex subunit 3 [Source:HGNC Symbol;Acc:HGNC:23999]  
282 EML2 echinoderm microtubule associated protein like 2 [Source:HGNC Symbol;Acc:HGNC:18035]  
283 EML3 echinoderm microtubule associated protein like 3 [Source:HGNC Symbol;Acc:HGNC:26666]  
284 ENDOU endonuclease, poly(U) specific [Source:HGNC Symbol;Acc:HGNC:14369]  
285 ENG endoglin [Source:HGNC Symbol;Acc:HGNC:3349]  
286 ENHO energy homeostasis associated [Source:HGNC Symbol;Acc:HGNC:24838]  
287 ENO4 enolase family member 4 [Source:HGNC Symbol;Acc:HGNC:31670]  
288 ENPEP glutamyl aminopeptidase [Source:HGNC Symbol;Acc:HGNC:3355]  
289 ENTPD1 ectonucleoside triphosphate diphosphohydrolase 1 [Source:HGNC Symbol;Acc:HGNC:3363]  
290 ENTPD3 ectonucleoside triphosphate diphosphohydrolase 3 [Source:HGNC Symbol;Acc:HGNC:3365]  
291 EP300 E1A binding protein p300 [Source:HGNC Symbol;Acc:HGNC:3373]  
292 EPM2A epilepsy, progressive myoclonus type 2A, Lafora disease (laforin) [Source:HGNC Symbol;Acc:HGNC:3413]

293 EPN3 epsin 3 [Source:HGNC Symbol;Acc:HGNC:18235]  
294 ERC1 ELKS/RAB6-interacting/CAST family member 1 [Source:HGNC Symbol;Acc:HGNC:17072]  
295 ERCC6L2 ERCC excision repair 6 like 2 [Source:HGNC Symbol;Acc:HGNC:26922]  
ERMAP erythroblast membrane associated protein (Scianna blood group) [Source:HGNC  
296 Symbol;Acc:HGNC:15743]  
297 ETNK2 ethanolamine kinase 2 [Source:HGNC Symbol;Acc:HGNC:25575]  
298 EVA1B eva-1 homolog B [Source:HGNC Symbol;Acc:HGNC:25558]  
299 EVPLL envoplakin like [Source:HGNC Symbol;Acc:HGNC:35236]  
300 EXOSC10 exosome component 10 [Source:HGNC Symbol;Acc:HGNC:9138]  
301 EXTL3 exostosin like glycosyltransferase 3 [Source:HGNC Symbol;Acc:HGNC:3518]  
302 EYA4 EYA transcriptional coactivator and phosphatase 4 [Source:HGNC Symbol;Acc:HGNC:3522]  
303 FABP6 fatty acid binding protein 6 [Source:HGNC Symbol;Acc:HGNC:3561]  
304 FADD Fas associated via death domain [Source:HGNC Symbol;Acc:HGNC:3573]  
305 FAM102A family with sequence similarity 102 member A [Source:HGNC Symbol;Acc:HGNC:31419]  
306 FAM13A family with sequence similarity 13 member A [Source:HGNC Symbol;Acc:HGNC:19367]  
307 FAM173B family with sequence similarity 173 member B [Source:HGNC Symbol;Acc:HGNC:27029]  
308 FAM178A SMC5-SMC6 complex localization factor 2 [Source:HGNC Symbol;Acc:HGNC:17814]  
309 FAM181A family with sequence similarity 181 member A [Source:HGNC Symbol;Acc:HGNC:20491]  
310 FAM186B family with sequence similarity 186 member B [Source:HGNC Symbol;Acc:HGNC:25296]  
311 FAM187A family with sequence similarity 187 member A [Source:HGNC Symbol;Acc:HGNC:35153]  
312 FAM198B family with sequence similarity 198 member B [Source:HGNC Symbol;Acc:HGNC:25312]  
313 FAM211A N/A  
FAM215A family with sequence similarity 215 member A (non-protein coding) [Source:HGNC  
314 Symbol;Acc:HGNC:17505]  
315 FAM21C family with sequence similarity 21 member C [Source:HGNC Symbol;Acc:HGNC:23414]  
316 FAM26F family with sequence similarity 26 member F [Source:HGNC Symbol;Acc:HGNC:33391]  
317 FAM49B family with sequence similarity 49 member B [Source:HGNC Symbol;Acc:HGNC:25216]  
318 FAM63B family with sequence similarity 63 member B [Source:HGNC Symbol;Acc:HGNC:26954]  
319 FAM83F family with sequence similarity 83 member F [Source:HGNC Symbol;Acc:HGNC:25148]  
320 FANCD2 Fanconi anemia complementation group D2 [Source:HGNC Symbol;Acc:HGNC:3585]

321 FAP fibroblast activation protein alpha [Source:HGNC Symbol;Acc:HGNC:3590]  
322 FAR2 fatty acyl-CoA reductase 2 [Source:HGNC Symbol;Acc:HGNC:25531]  
323 FAT2 FAT atypical cadherin 2 [Source:HGNC Symbol;Acc:HGNC:3596]  
324 FAU FAU, ubiquitin like and ribosomal protein S30 fusion [Source:HGNC Symbol;Acc:HGNC:3597]  
325 FBXL15 F-box and leucine rich repeat protein 15 [Source:HGNC Symbol;Acc:HGNC:28155]  
326 FBXL19 F-box and leucine rich repeat protein 19 [Source:HGNC Symbol;Acc:HGNC:25300]  
327 FBXL22 F-box and leucine rich repeat protein 22 [Source:HGNC Symbol;Acc:HGNC:27537]  
328 FBXO11 F-box protein 11 [Source:HGNC Symbol;Acc:HGNC:13590]  
329 FBXO18 F-box protein, helicase, 18 [Source:HGNC Symbol;Acc:HGNC:13620]  
330 FBXW8 F-box and WD repeat domain containing 8 [Source:HGNC Symbol;Acc:HGNC:13597]  
331 FDPS farnesyl diphosphate synthase [Source:HGNC Symbol;Acc:HGNC:3631]  
332 FER1L6 fer-1 like family member 6 [Source:HGNC Symbol;Acc:HGNC:28065]  
333 FGD5 FYVE, RhoGEF and PH domain containing 5 [Source:HGNC Symbol;Acc:HGNC:19117]  
334 FGFR1 fibroblast growth factor receptor 1 [Source:HGNC Symbol;Acc:HGNC:3688]  
335 FGL1 fibrinogen like 1 [Source:HGNC Symbol;Acc:HGNC:3695]  
336 FKBP4 FK506 binding protein 4 [Source:HGNC Symbol;Acc:HGNC:3720]  
336 FKBP4 FK506 binding protein like [Source:HGNC Symbol;Acc:HGNC:13949]  
337 FKBP8 FK506 binding protein 8 [Source:HGNC Symbol;Acc:HGNC:3724]  
338 FLG filaggrin [Source:HGNC Symbol;Acc:HGNC:3748]  
339 FLI1 Fli-1 proto-oncogene, ETS transcription factor [Source:HGNC Symbol;Acc:HGNC:3749]  
340 FLNB filamin B [Source:HGNC Symbol;Acc:HGNC:3755]  
    FLVCR2 feline leukemia virus subgroup C cellular receptor family member 2 [Source:HGNC  
341 Symbol;Acc:HGNC:20105]  
342 FMNL1 formin like 1 [Source:HGNC Symbol;Acc:HGNC:1212]  
343 FOXJ1 forkhead box J1 [Source:HGNC Symbol;Acc:HGNC:3816]  
344 FRMD4A FERM domain containing 4A [Source:HGNC Symbol;Acc:HGNC:25491]  
345 FSIP1 fibrous sheath interacting protein 1 [Source:HGNC Symbol;Acc:HGNC:21674]  
346 FTSJ3 FtsJ homolog 3 [Source:HGNC Symbol;Acc:HGNC:17136]  
347 FUT4 fucosyltransferase 4 [Source:HGNC Symbol;Acc:HGNC:4015]  
348 FXYD2 FXYD domain containing ion transport regulator 2 [Source:HGNC Symbol;Acc:HGNC:4026]

349 FXYD6 FXYD domain containing ion transport regulator 6 [Source:HGNC Symbol;Acc:HGNC:4030]  
350 FXYD6-FXYD2 FXYD6-FXYD2 readthrough [Source:HGNC Symbol;Acc:HGNC:39978]  
351 FZD4 frizzled class receptor 4 [Source:HGNC Symbol;Acc:HGNC:4042]  
352 FZD6 frizzled class receptor 6 [Source:HGNC Symbol;Acc:HGNC:4044]  
353 GABARAPL1 GABA type A receptor associated protein like 1 [Source:HGNC Symbol;Acc:HGNC:4068]  
354 GABRP gamma-aminobutyric acid type A receptor pi subunit [Source:HGNC Symbol;Acc:HGNC:4089]  
355 GALNT16 polypeptide N-acetylgalactosaminyltransferase 16 [Source:HGNC Symbol;Acc:HGNC:23233]  
356 GAPDHS glyceraldehyde-3-phosphate dehydrogenase, spermatogenic [Source:HGNC Symbol;Acc:HGNC:24864]  
357 GARS glycyl-tRNA synthetase [Source:HGNC Symbol;Acc:HGNC:4162]  
358 GBX2 gastrulation brain homeobox 2 [Source:HGNC Symbol;Acc:HGNC:4186]  
359 GCC2 GRIP and coiled-coil domain containing 2 [Source:HGNC Symbol;Acc:HGNC:23218]  
360 GCSAM germinal center associated signaling and motility [Source:HGNC Symbol;Acc:HGNC:20253]  
361 GDE1 glycerophosphodiester phosphodiesterase 1 [Source:HGNC Symbol;Acc:HGNC:29644]  
362 GET4 golgi to ER traffic protein 4 [Source:HGNC Symbol;Acc:HGNC:21690]  
363 GGNBP1 gametogenetin binding protein 1 (pseudogene) [Source:HGNC Symbol;Acc:HGNC:19427]  
364 GHITM growth hormone inducible transmembrane protein [Source:HGNC Symbol;Acc:HGNC:17281]  
365 GHRL ghrelin and obestatin prepropeptide [Source:HGNC Symbol;Acc:HGNC:18129]  
366 GINS4 GINS complex subunit 4 [Source:HGNC Symbol;Acc:HGNC:28226]  
367 GK glycerol kinase [Source:HGNC Symbol;Acc:HGNC:4289]  
368 GLE1 GLE1, RNA export mediator [Source:HGNC Symbol;Acc:HGNC:4315]  
369 GLIS3 GLIS family zinc finger 3 [Source:HGNC Symbol;Acc:HGNC:28510]  
370 GLYCK glycerate kinase [Source:HGNC Symbol;Acc:HGNC:24247]  
371 GNA15 G protein subunit alpha 15 [Source:HGNC Symbol;Acc:HGNC:4383]  
372 GNAL G protein subunit alpha L [Source:HGNC Symbol;Acc:HGNC:4388]  
373 GNB3 G protein subunit beta 3 [Source:HGNC Symbol;Acc:HGNC:4400]  
374 GNB5 G protein subunit beta 5 [Source:HGNC Symbol;Acc:HGNC:4401]  
375 GNPDA2 glucosamine-6-phosphate deaminase 2 [Source:HGNC Symbol;Acc:HGNC:21526]  
376 GNRHR gonadotropin releasing hormone receptor [Source:HGNC Symbol;Acc:HGNC:4421]  
377 GOT2 glutamic-oxaloacetic transaminase 2 [Source:HGNC Symbol;Acc:HGNC:4433]  
378 GPR113 N/A

379 GRK6 G protein-coupled receptor kinase 6 [Source:HGNC Symbol;Acc:HGNC:4545]  
380 GRPEL2 GrpE like 2, mitochondrial [Source:HGNC Symbol;Acc:HGNC:21060]  
381 GSN gelsolin [Source:HGNC Symbol;Acc:HGNC:4620]  
382 GSTM3 glutathione S-transferase mu 3 [Source:HGNC Symbol;Acc:HGNC:4635]  
383 GTDC1 glycosyltransferase like domain containing 1 [Source:HGNC Symbol;Acc:HGNC:20887]  
384 GTF2I general transcription factor Iii [Source:HGNC Symbol;Acc:HGNC:4659]  
385 GTF3C2 general transcription factor IIIC subunit 2 [Source:HGNC Symbol;Acc:HGNC:4665]  
386 GTF3C4 general transcription factor IIIC subunit 4 [Source:HGNC Symbol;Acc:HGNC:4667]  
387 GYS2 glycogen synthase 2 [Source:HGNC Symbol;Acc:HGNC:4707]  
388 GZMK granzyme K [Source:HGNC Symbol;Acc:HGNC:4711]  
389 H1FX H1 histone family member X [Source:HGNC Symbol;Acc:HGNC:4722]  
390 H2AFY H2A histone family member Y [Source:HGNC Symbol;Acc:HGNC:4740]  
391 H2AFZ H2A histone family member Z [Source:HGNC Symbol;Acc:HGNC:4741]  
392 H3F3A H3 histone family member 3B [Source:HGNC Symbol;Acc:HGNC:4765]  
392 H3F3A H3 histone family member 3A [Source:HGNC Symbol;Acc:HGNC:4764]  
393 HAND2 heart and neural crest derivatives expressed 2 [Source:HGNC Symbol;Acc:HGNC:4808]  
394 HARS histidyl-tRNA synthetase [Source:HGNC Symbol;Acc:HGNC:4816]  
    HCN2 hyperpolarization activated cyclic nucleotide gated potassium channel 2 [Source:HGNC  
395 Symbol;Acc:HGNC:4846]  
396 HCRTR1 hypocretin receptor 1 [Source:HGNC Symbol;Acc:HGNC:4848]  
397 HDAC11 histone deacetylase 11 [Source:HGNC Symbol;Acc:HGNC:19086]  
398 HDAC2 histone deacetylase 2 [Source:HGNC Symbol;Acc:HGNC:4853]  
399 HDHD2 haloacid dehalogenase like hydrolase domain containing 2 [Source:HGNC Symbol;Acc:HGNC:25364]  
400 HEATR5A HEAT repeat containing 5A [Source:HGNC Symbol;Acc:HGNC:20276]  
401 HECA hdc homolog, cell cycle regulator [Source:HGNC Symbol;Acc:HGNC:21041]  
    HECW1 HECT, C2 and WW domain containing E3 ubiquitin protein ligase 1 [Source:HGNC  
402 Symbol;Acc:HGNC:22195]  
403 HERPUD2 HERPUD family member 2 [Source:HGNC Symbol;Acc:HGNC:21915]  
404 HEXA hexosaminidase subunit alpha [Source:HGNC Symbol;Acc:HGNC:4878]  
405 HEXIM2 hexamethylene bisacetamide inducible 2 [Source:HGNC Symbol;Acc:HGNC:28591]

|     |            |                                                                                                      |
|-----|------------|------------------------------------------------------------------------------------------------------|
| 406 | HHATL      | hedgehog acyltransferase-like [Source:HGNC Symbol;Acc:HGNC:13242]                                    |
| 407 | HIST2H3PS2 | N/A                                                                                                  |
| 408 | HK2        | hexokinase 2 [Source:HGNC Symbol;Acc:HGNC:4923]                                                      |
| 409 | HLX        | H2.0 like homeobox [Source:HGNC Symbol;Acc:HGNC:4978]                                                |
| 410 | HOMER3     | homer scaffolding protein 3 [Source:HGNC Symbol;Acc:HGNC:17514]                                      |
| 411 | HSD17B1    | hydroxysteroid 17-beta dehydrogenase 1 [Source:HGNC Symbol;Acc:HGNC:5210]                            |
| 412 | HSD17B2    | hydroxysteroid 17-beta dehydrogenase 2 [Source:HGNC Symbol;Acc:HGNC:5211]                            |
| 413 | HSFY1      | heat shock transcription factor, Y-linked 2 [Source:HGNC Symbol;Acc:HGNC:23950]                      |
| 413 | HSFY1      | heat shock transcription factor, Y-linked 1 [Source:HGNC Symbol;Acc:HGNC:18568]                      |
| 414 | HSFY2      | heat shock transcription factor, Y-linked 2 [Source:HGNC Symbol;Acc:HGNC:23950]                      |
| 415 | HSP90AA1   | heat shock protein 90 alpha family class A member 1 [Source:HGNC Symbol;Acc:HGNC:5253]               |
| 416 | HSP90B1    | heat shock protein 90 beta family member 1 [Source:HGNC Symbol;Acc:HGNC:12028]                       |
| 417 | HSPG2      | heparan sulfate proteoglycan 2 [Source:HGNC Symbol;Acc:HGNC:5273]                                    |
| 418 | ICAM1      | intercellular adhesion molecule 1 [Source:HGNC Symbol;Acc:HGNC:5344]                                 |
| 419 | ID2        | inhibitor of DNA binding 2, HLH protein [Source:HGNC Symbol;Acc:HGNC:5361]                           |
| 420 | IFNAR2     | interferon alpha and beta receptor subunit 2 [Source:HGNC Symbol;Acc:HGNC:5433]                      |
|     | IGFN1      | immunoglobulin-like and fibronectin type III domain containing 1 [Source:HGNC Symbol;Acc:HGNC:24607] |
| 421 |            |                                                                                                      |
| 422 | IGLL1      | immunoglobulin lambda like polypeptide 1 [Source:HGNC Symbol;Acc:HGNC:5870]                          |
| 423 | IGSF22     | immunoglobulin superfamily member 22 [Source:HGNC Symbol;Acc:HGNC:26750]                             |
| 424 | IKZF5      | IKAROS family zinc finger 5 [Source:HGNC Symbol;Acc:HGNC:14283]                                      |
| 425 | IL12A      | interleukin 12A [Source:HGNC Symbol;Acc:HGNC:5969]                                                   |
| 426 | IL16       | interleukin 16 [Source:HGNC Symbol;Acc:HGNC:5980]                                                    |
| 427 | IL17RB     | interleukin 17 receptor B [Source:HGNC Symbol;Acc:HGNC:18015]                                        |
| 428 | IL21       | interleukin 21 [Source:HGNC Symbol;Acc:HGNC:6005]                                                    |
| 429 | IL21R      | interleukin 21 receptor [Source:HGNC Symbol;Acc:HGNC:6006]                                           |
| 430 | IL2RA      | interleukin 2 receptor subunit alpha [Source:HGNC Symbol;Acc:HGNC:6008]                              |
| 431 | IMMT       | inner membrane mitochondrial protein [Source:HGNC Symbol;Acc:HGNC:6047]                              |
| 432 | IMP3       | IMP3, U3 small nucleolar ribonucleoprotein [Source:HGNC Symbol;Acc:HGNC:14497]                       |
| 433 | INTS6      | integrator complex subunit 6 [Source:HGNC Symbol;Acc:HGNC:14879]                                     |

434 IPO9 importin 9 [Source:HGNC Symbol;Acc:HGNC:19425]  
435 IQCC IQ motif containing C [Source:HGNC Symbol;Acc:HGNC:25545]  
436 IQCF5 IQ motif containing F5 [Source:HGNC Symbol;Acc:HGNC:35159]  
437 IQCH IQ motif containing H [Source:HGNC Symbol;Acc:HGNC:25721]  
438 IQSEC3 IQ motif and Sec7 domain 3 [Source:HGNC Symbol;Acc:HGNC:29193]  
439 IRAK3 interleukin 1 receptor associated kinase 3 [Source:HGNC Symbol;Acc:HGNC:17020]  
440 ITFG1 integrin alpha FG-GAP repeat containing 1 [Source:HGNC Symbol;Acc:HGNC:30697]  
441 ITFG2 integrin alpha FG-GAP repeat containing 2 [Source:HGNC Symbol;Acc:HGNC:30879]  
442 ITGA5 integrin subunit alpha 5 [Source:HGNC Symbol;Acc:HGNC:6141]  
443 ITGA6 integrin subunit alpha 6 [Source:HGNC Symbol;Acc:HGNC:6142]  
444 ITGAL integrin subunit alpha L [Source:HGNC Symbol;Acc:HGNC:6148]  
445 ITLN2 intelectin 2 [Source:HGNC Symbol;Acc:HGNC:20599]  
446 IWS1 IWS1, SUPT6H interacting protein [Source:HGNC Symbol;Acc:HGNC:25467]  
447 JAG1 jagged 1 [Source:HGNC Symbol;Acc:HGNC:6188]  
448 JAKMIP3 Janus kinase and microtubule interacting protein 3 [Source:HGNC Symbol;Acc:HGNC:23523]  
449 JAM3 junctional adhesion molecule 3 [Source:HGNC Symbol;Acc:HGNC:15532]  
450 KANSL1L KAT8 regulatory NSL complex subunit 1 like [Source:HGNC Symbol;Acc:HGNC:26310]  
451 KAZN kazrin, periplakin interacting protein [Source:HGNC Symbol;Acc:HGNC:29173]  
    KCNE3 potassium voltage-gated channel subfamily E regulatory subunit 3 [Source:HGNC Symbol;Acc:HGNC:6243]  
452  
453 KCNJ16 potassium voltage-gated channel subfamily J member 16 [Source:HGNC Symbol;Acc:HGNC:6262]  
454 KCNK15 potassium two pore domain channel subfamily K member 15 [Source:HGNC Symbol;Acc:HGNC:13814]  
455 KCNMA1 potassium calcium-activated channel subfamily M alpha 1 [Source:HGNC Symbol;Acc:HGNC:6284]  
    KCNMB1 potassium calcium-activated channel subfamily M regulatory beta subunit 1 [Source:HGNC  
456 Symbol;Acc:HGNC:6285]  
457 KCNQ1 potassium voltage-gated channel subfamily Q member 1 [Source:HGNC Symbol;Acc:HGNC:6294]  
458 KCTD13 potassium channel tetramerization domain containing 13 [Source:HGNC Symbol;Acc:HGNC:22234]  
459 KCTD21 potassium channel tetramerization domain containing 21 [Source:HGNC Symbol;Acc:HGNC:27452]  
460 KDM8 lysine demethylase 8 [Source:HGNC Symbol;Acc:HGNC:25840]  
461 KIAA0100 KIAA0100 [Source:HGNC Symbol;Acc:HGNC:28960]



462 KIAA0556 KIAA0556 [Source:HGNC Symbol;Acc:HGNC:29068]  
463 KIAA0586 KIAA0586 [Source:HGNC Symbol;Acc:HGNC:19960]  
464 KIAA1614 KIAA1614 [Source:HGNC Symbol;Acc:HGNC:29327]  
465 KIF1C kinesin family member 1C [Source:HGNC Symbol;Acc:HGNC:6317]  
466 KIF23 kinesin family member 23 [Source:HGNC Symbol;Acc:HGNC:6392]  
467 KIF2C kinesin family member 2C [Source:HGNC Symbol;Acc:HGNC:6393]  
468 KIF4A kinesin family member 4A [Source:HGNC Symbol;Acc:HGNC:13339]  
469 KIF9 kinesin family member 9 [Source:HGNC Symbol;Acc:HGNC:16666]  
470 KLC2 kinesin light chain 2 [Source:HGNC Symbol;Acc:HGNC:20716]  
471 KLF3 Kruppel like factor 3 [Source:HGNC Symbol;Acc:HGNC:16516]  
472 KLK10 kallikrein related peptidase 10 [Source:HGNC Symbol;Acc:HGNC:6358]  
473 KLK5 kallikrein related peptidase 5 [Source:HGNC Symbol;Acc:HGNC:6366]  
474 KLK6 kallikrein related peptidase 6 [Source:HGNC Symbol;Acc:HGNC:6367]  
475 KMT2A lysine methyltransferase 2A [Source:HGNC Symbol;Acc:HGNC:7132]  
476 KMT2E lysine methyltransferase 2E [Source:HGNC Symbol;Acc:HGNC:18541]  
477 KNG1 kininogen 1 [Source:HGNC Symbol;Acc:HGNC:6383]  
478 KNOP1 lysine rich nucleolar protein 1 [Source:HGNC Symbol;Acc:HGNC:34404]  
479 KRBA2 KRAB-A domain containing 2 [Source:HGNC Symbol;Acc:HGNC:26989]  
480 KRT13 keratin 13 [Source:HGNC Symbol;Acc:HGNC:6415]  
481 KRT37 keratin 37 [Source:HGNC Symbol;Acc:HGNC:6455]  
482 KRT7 keratin 7 [Source:HGNC Symbol;Acc:HGNC:6445]  
483 KRT72 keratin 72 [Source:HGNC Symbol;Acc:HGNC:28932]  
484 KRT73 keratin 73 [Source:HGNC Symbol;Acc:HGNC:28928]  
485 KRT75 keratin 75 [Source:HGNC Symbol;Acc:HGNC:24431]  
486 KRT84 keratin 84 [Source:HGNC Symbol;Acc:HGNC:6461]  
487 KRT86 keratin 86 [Source:HGNC Symbol;Acc:HGNC:6463]  
488 KTN1 kinectin 1 [Source:HGNC Symbol;Acc:HGNC:6467]  
489 KXD1 KxDL motif containing 1 [Source:HGNC Symbol;Acc:HGNC:28420]  
490 L2HGDH L-2-hydroxyglutarate dehydrogenase [Source:HGNC Symbol;Acc:HGNC:20499]  
491 L3MBTL2 L3MBTL2 polycomb repressive complex 1 subunit [Source:HGNC Symbol;Acc:HGNC:18594]

492 L3MBTL4 I(3)mbt-like 4 (Drosophila) [Source:HGNC Symbol;Acc:HGNC:26677]  
493 LAMP5 lysosomal associated membrane protein family member 5 [Source:HGNC Symbol;Acc:HGNC:16097]  
494 LAMTOR5 late endosomal/lysosomal adaptor, MAPK and MTOR activator 5 [Source:HGNC Symbol;Acc:HGNC:17955]  
495 LAT linker for activation of T-cells [Source:HGNC Symbol;Acc:HGNC:18874]  
496 LBX1 ladybird homeobox 1 [Source:HGNC Symbol;Acc:HGNC:16960]  
497 LCA10 lung carcinoma-associated 10 [Source:EntrezGene;Acc:100996465]  
498 LCT lactase [Source:HGNC Symbol;Acc:HGNC:6530]  
499 LDLRAD2 low density lipoprotein receptor class A domain containing 2 [Source:HGNC Symbol;Acc:HGNC:32071]  
500 LECT2 leukocyte cell derived chemotaxin 2 [Source:HGNC Symbol;Acc:HGNC:6550]  
501 LGI3 leucine rich repeat LGI family member 3 [Source:HGNC Symbol;Acc:HGNC:18711]  
502 LHX4 LIM homeobox 4 [Source:HGNC Symbol;Acc:HGNC:21734]  
503 LIF leukemia inhibitory factor [Source:HGNC Symbol;Acc:HGNC:6596]  
504 LIFR leukemia inhibitory factor receptor alpha [Source:HGNC Symbol;Acc:HGNC:6597]  
505 LIN37 lin-37 DREAM MuvB core complex component [Source:HGNC Symbol;Acc:HGNC:33234]  
506 LIPE lipase E, hormone sensitive type [Source:HGNC Symbol;Acc:HGNC:6621]  
507 LIX1L limb and CNS expressed 1 like [Source:HGNC Symbol;Acc:HGNC:28715]  
508 LNX1 ligand of numb-protein X 1 [Source:HGNC Symbol;Acc:HGNC:6657]  
509 LOXL1 lysyl oxidase like 1 [Source:HGNC Symbol;Acc:HGNC:6665]  
510 LPGAT1 lysophosphatidylglycerol acyltransferase 1 [Source:HGNC Symbol;Acc:HGNC:28985]  
511 LPHN1 N/A  
512 LPP LIM domain containing preferred translocation partner in lipoma [Source:HGNC Symbol;Acc:HGNC:6679]  
513 LRFN4 leucine rich repeat and fibronectin type III domain containing 4 [Source:HGNC Symbol;Acc:HGNC:28456]  
514 LRIF1 ligand dependent nuclear receptor interacting factor 1 [Source:HGNC Symbol;Acc:HGNC:30299]  
515 LRP4 LDL receptor related protein 4 [Source:HGNC Symbol;Acc:HGNC:6696]  
516 LRP8 LDL receptor related protein 8 [Source:HGNC Symbol;Acc:HGNC:6700]  
517 LRRC17 leucine rich repeat containing 17 [Source:HGNC Symbol;Acc:HGNC:16895]  
518 LRRC32 leucine rich repeat containing 32 [Source:HGNC Symbol;Acc:HGNC:4161]  
519 LRRC38 leucine rich repeat containing 38 [Source:HGNC Symbol;Acc:HGNC:27005]  
520 LRRC49 leucine rich repeat containing 49 [Source:HGNC Symbol;Acc:HGNC:25965]  
521 LRRC59 leucine rich repeat containing 59 [Source:HGNC Symbol;Acc:HGNC:28817]

522 LRRK1 leucine rich repeat kinase 1 [Source:HGNC Symbol;Acc:HGNC:18608]  
523 LRRN1 leucine rich repeat neuronal 1 [Source:HGNC Symbol;Acc:HGNC:20980]  
LRTOMT leucine rich transmembrane and O-methyltransferase domain containing [Source:HGNC  
524 Symbol;Acc:HGNC:25033]  
525 LSM1 LSM1 homolog, mRNA degradation associated [Source:HGNC Symbol;Acc:HGNC:20472]  
LSM7 LSM7 homolog, U6 small nuclear RNA and mRNA degradation associated [Source:HGNC  
526 Symbol;Acc:HGNC:20470]  
527 LTBR lymphotoxin beta receptor [Source:HGNC Symbol;Acc:HGNC:6718]  
528 LYPD1 LY6/PLAUR domain containing 1 [Source:HGNC Symbol;Acc:HGNC:28431]  
529 LYRM9 LYR motif containing 9 [Source:HGNC Symbol;Acc:HGNC:27314]  
530 MAATS1 MYCBP associated and testis expressed 1 [Source:HGNC Symbol;Acc:HGNC:24010]  
531 MAD2L1 MAD2 mitotic arrest deficient-like 1 (yeast) [Source:HGNC Symbol;Acc:HGNC:6763]  
532 MAL2 mal, T-cell differentiation protein 2 (gene/pseudogene) [Source:HGNC Symbol;Acc:HGNC:13634]  
533 MAMDC2 MAM domain containing 2 [Source:HGNC Symbol;Acc:HGNC:23673]  
534 MAP2K1 mitogen-activated protein kinase kinase 1 [Source:HGNC Symbol;Acc:HGNC:6840]  
535 MAP4K1 mitogen-activated protein kinase kinase kinase kinase 1 [Source:HGNC Symbol;Acc:HGNC:6863]  
536 MAP9 microtubule associated protein 9 [Source:HGNC Symbol;Acc:HGNC:26118]  
537 MAPK7 mitogen-activated protein kinase 7 [Source:HGNC Symbol;Acc:HGNC:6880]  
538 MAPKAPK5 mitogen-activated protein kinase-activated protein kinase 5 [Source:HGNC Symbol;Acc:HGNC:6889]  
539 MAPT microtubule associated protein tau [Source:HGNC Symbol;Acc:HGNC:6893]  
540 MAST3 microtubule associated serine/threonine kinase 3 [Source:HGNC Symbol;Acc:HGNC:19036]  
541 MATN1 matrilin 1, cartilage matrix protein [Source:HGNC Symbol;Acc:HGNC:6907]  
542 MATR3 matrin 3 [Source:HGNC Symbol;Acc:HGNC:6912]  
543 MAX MYC associated factor X [Source:HGNC Symbol;Acc:HGNC:6913]  
544 MBNL1 muscleblind like splicing regulator 1 [Source:HGNC Symbol;Acc:HGNC:6923]  
545 MBP myelin basic protein [Source:HGNC Symbol;Acc:HGNC:6925]  
546 MC1R melanocortin 1 receptor [Source:HGNC Symbol;Acc:HGNC:6929]  
547 MCFD2 multiple coagulation factor deficiency 2 [Source:HGNC Symbol;Acc:HGNC:18451]  
MCM3AP minichromosome maintenance complex component 3 associated protein [Source:HGNC  
548 Symbol;Acc:HGNC:6946]

549 MCPH1 microcephalin 1 [Source:HGNC Symbol;Acc:HGNC:6954]  
550 MED12L mediator complex subunit 12 like [Source:HGNC Symbol;Acc:HGNC:16050]  
551 MEF2C myocyte enhancer factor 2C [Source:HGNC Symbol;Acc:HGNC:6996]  
552 MEST mesoderm specific transcript [Source:HGNC Symbol;Acc:HGNC:7028]  
553 METAP1D methionyl aminopeptidase type 1D, mitochondrial [Source:HGNC Symbol;Acc:HGNC:32583]  
554 METTL18 methyltransferase like 18 [Source:HGNC Symbol;Acc:HGNC:28793]  
555 MFAP3 microfibrillar associated protein 3 [Source:HGNC Symbol;Acc:HGNC:7034]  
556 MFF mitochondrial fission factor [Source:HGNC Symbol;Acc:HGNC:24858]  
557 MGP matrix Gla protein [Source:HGNC Symbol;Acc:HGNC:7060]  
558 MIEN1 migration and invasion enhancer 1 [Source:HGNC Symbol;Acc:HGNC:28230]  
559 MIOS meiosis regulator for oocyte development [Source:HGNC Symbol;Acc:HGNC:21905]  
560 MKLN1 muskelin 1 [Source:HGNC Symbol;Acc:HGNC:7109]  
561 MKNK1 MAP kinase interacting serine/threonine kinase 1 [Source:HGNC Symbol;Acc:HGNC:7110]  
562 MKRN3 makorin ring finger protein 3 [Source:HGNC Symbol;Acc:HGNC:7114]  
563 MLLT6 MLLT6, PHD finger domain containing [Source:HGNC Symbol;Acc:HGNC:7138]  
564 MLTK N/A  
565 MME membrane metalloendopeptidase [Source:HGNC Symbol;Acc:HGNC:7154]  
566 MMP1 matrix metallopeptidase 1 [Source:HGNC Symbol;Acc:HGNC:7155]  
567 MMP16 matrix metallopeptidase 16 [Source:HGNC Symbol;Acc:HGNC:7162]  
568 MMP24 matrix metallopeptidase 24 [Source:HGNC Symbol;Acc:HGNC:7172]  
569 MMP25 matrix metallopeptidase 25 [Source:HGNC Symbol;Acc:HGNC:14246]  
570 MMP3 matrix metallopeptidase 3 [Source:HGNC Symbol;Acc:HGNC:7173]  
571 MMP9 matrix metallopeptidase 9 [Source:HGNC Symbol;Acc:HGNC:7176]  
572 MORF4L2 mortality factor 4 like 2 [Source:HGNC Symbol;Acc:HGNC:16849]  
573 MPND MPN domain containing [Source:HGNC Symbol;Acc:HGNC:25934]  
574 MRGPRX1 MAS related GPR family member X1 [Source:HGNC Symbol;Acc:HGNC:17962]  
575 MRI1 methylthioribose-1-phosphate isomerase 1 [Source:HGNC Symbol;Acc:HGNC:28469]  
576 MRPL23 mitochondrial ribosomal protein L23 [Source:HGNC Symbol;Acc:HGNC:10322]  
577 MRPL37 mitochondrial ribosomal protein L37 [Source:HGNC Symbol;Acc:HGNC:14034]  
578 MRPL4 mitochondrial ribosomal protein L4 [Source:HGNC Symbol;Acc:HGNC:14276]

579 MRPL51 mitochondrial ribosomal protein L51 [Source:HGNC Symbol;Acc:HGNC:14044]  
580 MRV11 murine retrovirus integration site 1 homolog [Source:HGNC Symbol;Acc:HGNC:7237]  
581 MSANTD2 Myb/SANT DNA binding domain containing 2 [Source:HGNC Symbol;Acc:HGNC:26266]  
582 MSC musculin [Source:HGNC Symbol;Acc:HGNC:7321]  
583 MTAP methylthioadenosine phosphorylase [Source:HGNC Symbol;Acc:HGNC:7413]  
584 MTERFD3 mitochondrial transcription termination factor 2 [Source:HGNC Symbol;Acc:HGNC:30779]  
MTHFD2 methylenetetrahydrofolate dehydrogenase (NADP+ dependent) 2, methenyltetrahydrofolate  
585 cyclohydrolase [Source:HGNC Symbol;Acc:HGNC:7434]  
586 MTHFR methylenetetrahydrofolate reductase [Source:HGNC Symbol;Acc:HGNC:7436]  
587 MTIF3 mitochondrial translational initiation factor 3 [Source:HGNC Symbol;Acc:HGNC:29788]  
588 MTMR7 myotubularin related protein 7 [Source:HGNC Symbol;Acc:HGNC:7454]  
589 MTMR9 myotubularin related protein 9 [Source:HGNC Symbol;Acc:HGNC:14596]  
590 MTX1 metaxin 1 [Source:HGNC Symbol;Acc:HGNC:7504]  
591 MUC12 mucin 12, cell surface associated [Source:HGNC Symbol;Acc:HGNC:7510]  
592 MUC3A mucin 3A, cell surface associated [Source:HGNC Symbol;Acc:HGNC:7513]  
593 MYCBP2 MYC binding protein 2, E3 ubiquitin protein ligase [Source:HGNC Symbol;Acc:HGNC:23386]  
594 MYH11 myosin heavy chain 11 [Source:HGNC Symbol;Acc:HGNC:7569]  
595 MYL6 myosin light chain 6 [Source:HGNC Symbol;Acc:HGNC:7587]  
596 MYL6B myosin light chain 6B [Source:HGNC Symbol;Acc:HGNC:29823]  
597 MYLK myosin light chain kinase [Source:HGNC Symbol;Acc:HGNC:7590]  
598 MYNN myoneurin [Source:HGNC Symbol;Acc:HGNC:14955]  
599 MYO18B myosin XVIIIIB [Source:HGNC Symbol;Acc:HGNC:18150]  
600 MYO1D myosin ID [Source:HGNC Symbol;Acc:HGNC:7598]  
601 MYO5C myosin VC [Source:HGNC Symbol;Acc:HGNC:7604]  
602 MYOM3 myomesin 3 [Source:HGNC Symbol;Acc:HGNC:26679]  
603 MYOT myotilin [Source:HGNC Symbol;Acc:HGNC:12399]  
604 MYOZ3 myozenin 3 [Source:HGNC Symbol;Acc:HGNC:18565]  
605 NAA15 N(alpha)-acetyltransferase 15, NatA auxiliary subunit [Source:HGNC Symbol;Acc:HGNC:30782]  
606 NAALADL1 N-acetylated alpha-linked acidic dipeptidase like 1 [Source:HGNC Symbol;Acc:HGNC:23536]  
607 NALCN sodium leak channel, non-selective [Source:HGNC Symbol;Acc:HGNC:19082]

608 NANS N-acetylneuraminase synthase [Source:HGNC Symbol;Acc:HGNC:19237]  
609 NAPA NSF attachment protein alpha [Source:HGNC Symbol;Acc:HGNC:7641]  
610 NAV1 neuron navigator 1 [Source:HGNC Symbol;Acc:HGNC:15989]  
611 NCAPD2 non-SMC condensin I complex subunit D2 [Source:HGNC Symbol;Acc:HGNC:24305]  
612 NCF4 neutrophil cytosolic factor 4 [Source:HGNC Symbol;Acc:HGNC:7662]  
613 NCOR1 nuclear receptor corepressor 1 [Source:HGNC Symbol;Acc:HGNC:7672]  
614 NDRG2 NDRG family member 2 [Source:HGNC Symbol;Acc:HGNC:14460]  
615 NDST1 N-deacetylase and N-sulfotransferase 1 [Source:HGNC Symbol;Acc:HGNC:7680]  
616 NDUFA6 NADH:ubiquinone oxidoreductase subunit A6 [Source:HGNC Symbol;Acc:HGNC:7690]  
617 NECAB1 N-terminal EF-hand calcium binding protein 1 [Source:HGNC Symbol;Acc:HGNC:20983]  
618 NECAB3 N-terminal EF-hand calcium binding protein 3 [Source:HGNC Symbol;Acc:HGNC:15851]  
619 NEGR1 neuronal growth regulator 1 [Source:HGNC Symbol;Acc:HGNC:17302]  
620 NFYC nuclear transcription factor Y subunit gamma [Source:HGNC Symbol;Acc:HGNC:7806]  
621 NGLY1 N-glycanase 1 [Source:HGNC Symbol;Acc:HGNC:17646]  
622 NHSL1 NHS like 1 [Source:HGNC Symbol;Acc:HGNC:21021]  
623 NINJ2 ninjurin 2 [Source:HGNC Symbol;Acc:HGNC:7825]  
624 NIPAL3 NIPA like domain containing 3 [Source:HGNC Symbol;Acc:HGNC:25233]  
625 NIPAL4 NIPA like domain containing 4 [Source:HGNC Symbol;Acc:HGNC:28018]  
626 NKX2-1 NK2 homeobox 1 [Source:HGNC Symbol;Acc:HGNC:11825]  
627 NMT1 N-myristoyltransferase 1 [Source:HGNC Symbol;Acc:HGNC:7857]  
628 NOL3 nucleolar protein 3 [Source:HGNC Symbol;Acc:HGNC:7869]  
629 NOP14 NOP14 nucleolar protein [Source:HGNC Symbol;Acc:HGNC:16821]  
630 NPHP3 nephrocystin 3 [Source:HGNC Symbol;Acc:HGNC:7907]  
631 NPIP11 nuclear pore complex interacting protein family member B11 [Source:HGNC Symbol;Acc:HGNC:37453]  
632 NPNT nephronectin [Source:HGNC Symbol;Acc:HGNC:27405]  
633 NR2C2 nuclear receptor subfamily 2 group C member 2 [Source:HGNC Symbol;Acc:HGNC:7972]  
634 NR4A1 nuclear receptor subfamily 4 group A member 1 [Source:HGNC Symbol;Acc:HGNC:7980]  
635 NRD1 nardilysin convertase [Source:HGNC Symbol;Acc:HGNC:7995]  
636 NRG1 neurogranin [Source:HGNC Symbol;Acc:HGNC:8000]  
637 NUBP1 nucleotide binding protein 1 [Source:HGNC Symbol;Acc:HGNC:8041]

638 NUCB1 nucleobindin 1 [Source:HGNC Symbol;Acc:HGNC:8043]  
639 NUDT22 nudix hydrolase 22 [Source:HGNC Symbol;Acc:HGNC:28189]  
640 NUF2 NUF2, NDC80 kinetochore complex component [Source:HGNC Symbol;Acc:HGNC:14621]  
641 NUMA1 nuclear mitotic apparatus protein 1 [Source:HGNC Symbol;Acc:HGNC:8059]  
642 NUP107 nucleoporin 107 [Source:HGNC Symbol;Acc:HGNC:29914]  
643 NUP214 nucleoporin 214 [Source:HGNC Symbol;Acc:HGNC:8064]  
644 NUTF2 nuclear transport factor 2 [Source:HGNC Symbol;Acc:HGNC:13722]  
645 NUTM2A NUT family member 2A [Source:HGNC Symbol;Acc:HGNC:23438]  
646 OAS1 2'-5'-oligoadenylate synthetase 1 [Source:HGNC Symbol;Acc:HGNC:8086]  
647 ODF3L1 outer dense fiber of sperm tails 3 like 1 [Source:HGNC Symbol;Acc:HGNC:28735]  
648 OGFRL1 opioid growth factor receptor like 1 [Source:HGNC Symbol;Acc:HGNC:21378]  
649 OR2A42 olfactory receptor family 2 subfamily A member 42 [Source:HGNC Symbol;Acc:HGNC:31230]  
650 ORC4 origin recognition complex subunit 4 [Source:HGNC Symbol;Acc:HGNC:8490]  
651 OSBPL9 oxysterol binding protein like 9 [Source:HGNC Symbol;Acc:HGNC:16386]  
652 OSGEPL1 O-sialoglycoprotein endopeptidase like 1 [Source:HGNC Symbol;Acc:HGNC:23075]  
653 P4HA2 prolyl 4-hydroxylase subunit alpha 2 [Source:HGNC Symbol;Acc:HGNC:8547]  
654 PAQR5 progesterin and adipoQ receptor family member 5 [Source:HGNC Symbol;Acc:HGNC:29645]  
655 PARP2 poly(ADP-ribose) polymerase 2 [Source:HGNC Symbol;Acc:HGNC:272]  
656 PAX8 paired box 8 [Source:HGNC Symbol;Acc:HGNC:8622]  
657 PCBP1 poly(rC) binding protein 1 [Source:HGNC Symbol;Acc:HGNC:8647]  
658 PCF11 PCF11 cleavage and polyadenylation factor subunit [Source:HGNC Symbol;Acc:HGNC:30097]  
659 PDE2A phosphodiesterase 2A [Source:HGNC Symbol;Acc:HGNC:8777]  
660 PDE4D phosphodiesterase 4D [Source:HGNC Symbol;Acc:HGNC:8783]  
661 PDE5A phosphodiesterase 5A [Source:HGNC Symbol;Acc:HGNC:8784]  
662 PDE7B phosphodiesterase 7B [Source:HGNC Symbol;Acc:HGNC:8792]  
663 PDIA3 protein disulfide isomerase family A member 3 [Source:HGNC Symbol;Acc:HGNC:4606]  
664 PDK1 pyruvate dehydrogenase kinase 1 [Source:HGNC Symbol;Acc:HGNC:8809]  
665 PDXDC1 pyridoxal dependent decarboxylase domain containing 1 [Source:HGNC Symbol;Acc:HGNC:28995]  
666 PEF1 penta-EF-hand domain containing 1 [Source:HGNC Symbol;Acc:HGNC:30009]  
667 PELI3 pellino E3 ubiquitin protein ligase family member 3 [Source:HGNC Symbol;Acc:HGNC:30010]

668 PEX1 peroxisomal biogenesis factor 1 [Source:HGNC Symbol;Acc:HGNC:8850]  
669 PEX26 peroxisomal biogenesis factor 26 [Source:HGNC Symbol;Acc:HGNC:22965]  
670 PEX5L peroxisomal biogenesis factor 5 like [Source:HGNC Symbol;Acc:HGNC:30024]  
671 PHC2 polyhomeotic homolog 2 [Source:HGNC Symbol;Acc:HGNC:3183]  
672 PHF12 PHD finger protein 12 [Source:HGNC Symbol;Acc:HGNC:20816]  
673 PHF20L1 PHD finger protein 20-like 1 [Source:HGNC Symbol;Acc:HGNC:24280]  
674 PHLPP2 PH domain and leucine rich repeat protein phosphatase 2 [Source:HGNC Symbol;Acc:HGNC:29149]  
675 PIEZO1 piezo type mechanosensitive ion channel component 1 [Source:HGNC Symbol;Acc:HGNC:28993]  
676 PIEZO2 piezo type mechanosensitive ion channel component 2 [Source:HGNC Symbol;Acc:HGNC:26270]  
677 PIGW phosphatidylinositol glycan anchor biosynthesis class W [Source:HGNC Symbol;Acc:HGNC:23213]  
678 PITPNB phosphatidylinositol transfer protein beta [Source:HGNC Symbol;Acc:HGNC:9002]  
679 PKD2L2 polycystin 2 like 2, transient receptor potential cation channel [Source:HGNC Symbol;Acc:HGNC:9012]  
680 PKIG protein kinase (cAMP-dependent, catalytic) inhibitor gamma [Source:HGNC Symbol;Acc:HGNC:9019]  
681 PKP4 plakophilin 4 [Source:HGNC Symbol;Acc:HGNC:9026]  
682 PLA2G4C phospholipase A2 group IVC [Source:HGNC Symbol;Acc:HGNC:9037]  
683 PLA2G4E phospholipase A2 group IVE [Source:HGNC Symbol;Acc:HGNC:24791]  
684 PLCD3 phospholipase C delta 3 [Source:HGNC Symbol;Acc:HGNC:9061]  
685 PLCG1 phospholipase C gamma 1 [Source:HGNC Symbol;Acc:HGNC:9065]  
686 PLEKHA2 pleckstrin homology domain containing A2 [Source:HGNC Symbol;Acc:HGNC:14336]  
687 PLOD3 procollagen-lysine,2-oxoglutarate 5-dioxygenase 3 [Source:HGNC Symbol;Acc:HGNC:9083]  
688 PLXDC1 plexin domain containing 1 [Source:HGNC Symbol;Acc:HGNC:20945]  
689 PNCK pregnancy up-regulated nonubiquitous CaM kinase [Source:HGNC Symbol;Acc:HGNC:13415]  
690 POT1 protection of telomeres 1 [Source:HGNC Symbol;Acc:HGNC:17284]  
691 POTEK POTE ankyrin domain family member G [Source:HGNC Symbol;Acc:HGNC:33896]  
692 POTEH POTE ankyrin domain family member H [Source:HGNC Symbol;Acc:HGNC:133]  
693 POTEM POTE ankyrin domain family member M [Source:HGNC Symbol;Acc:HGNC:37096]  
694 PPFIA1 PTPRF interacting protein alpha 1 [Source:HGNC Symbol;Acc:HGNC:9245]  
695 PPFIA2 PTPRF interacting protein alpha 2 [Source:HGNC Symbol;Acc:HGNC:9246]  
696 PPME1 protein phosphatase methylesterase 1 [Source:HGNC Symbol;Acc:HGNC:30178]  
697 PPP2R1A protein phosphatase 2 scaffold subunit Aalpha [Source:HGNC Symbol;Acc:HGNC:9302]



698 PPP3CB protein phosphatase 3 catalytic subunit beta [Source:HGNC Symbol;Acc:HGNC:9315]  
699 PPP6R3 protein phosphatase 6 regulatory subunit 3 [Source:HGNC Symbol;Acc:HGNC:1173]  
700 PRICKLE2 prickle planar cell polarity protein 2 [Source:HGNC Symbol;Acc:HGNC:20340]  
701 PRKAB1 protein kinase AMP-activated non-catalytic subunit beta 1 [Source:HGNC Symbol;Acc:HGNC:9378]  
702 PRKAG1 protein kinase AMP-activated non-catalytic subunit gamma 1 [Source:HGNC Symbol;Acc:HGNC:9385]  
703 PRKRA protein activator of interferon induced protein kinase EIF2AK2 [Source:HGNC Symbol;Acc:HGNC:9438]  
704 PRMT5 protein arginine methyltransferase 5 [Source:HGNC Symbol;Acc:HGNC:10894]  
705 PRPF31 pre-mRNA processing factor 31 [Source:HGNC Symbol;Acc:HGNC:15446]  
706 PRPF4 pre-mRNA processing factor 4 [Source:HGNC Symbol;Acc:HGNC:17349]  
707 PRPF40A pre-mRNA processing factor 40 homolog A [Source:HGNC Symbol;Acc:HGNC:16463]  
708 PRPH peripherin [Source:HGNC Symbol;Acc:HGNC:9461]  
709 PRPSAP2 phosphoribosyl pyrophosphate synthetase associated protein 2 [Source:HGNC Symbol;Acc:HGNC:9467]  
710 PRRT3 proline rich transmembrane protein 3 [Source:HGNC Symbol;Acc:HGNC:26591]  
711 PSCA prostate stem cell antigen [Source:HGNC Symbol;Acc:HGNC:9500]  
712 PSD pleckstrin and Sec7 domain containing [Source:HGNC Symbol;Acc:HGNC:9507]  
713 PSMB8 proteasome subunit beta 8 [Source:HGNC Symbol;Acc:HGNC:9545]  
714 PSMD13 proteasome 26S subunit, non-ATPase 13 [Source:HGNC Symbol;Acc:HGNC:9558]  
715 PSMG3 proteasome assembly chaperone 3 [Source:HGNC Symbol;Acc:HGNC:22420]  
716 PTOV1 prostate tumor overexpressed 1 [Source:HGNC Symbol;Acc:HGNC:9632]  
717 PTPRB protein tyrosine phosphatase, receptor type B [Source:HGNC Symbol;Acc:HGNC:9665]  
718 PTPRK protein tyrosine phosphatase, receptor type K [Source:HGNC Symbol;Acc:HGNC:9674]  
719 PTPRN protein tyrosine phosphatase, receptor type N [Source:HGNC Symbol;Acc:HGNC:9676]  
720 PTRH1 peptidyl-tRNA hydrolase 1 homolog [Source:HGNC Symbol;Acc:HGNC:27039]  
721 PVRL1 nectin cell adhesion molecule 1 [Source:HGNC Symbol;Acc:HGNC:9706]  
722 PXN paxillin [Source:HGNC Symbol;Acc:HGNC:9718]  
723 R3HDML R3H domain containing like [Source:HGNC Symbol;Acc:HGNC:16249]  
724 RAB11FIP2 RAB11 family interacting protein 2 [Source:HGNC Symbol;Acc:HGNC:29152]  
725 RAB1B RAB1B, member RAS oncogene family [Source:HGNC Symbol;Acc:HGNC:18370]  
726 RAB33B RAB33B, member RAS oncogene family [Source:HGNC Symbol;Acc:HGNC:16075]  
727 RAB6C RAB6C, member RAS oncogene family [Source:HGNC Symbol;Acc:HGNC:16525]

727 RAB6C RAB6C-like [Source:EntrezGene;Acc:150786]  
728 RAB8A RAB8A, member RAS oncogene family [Source:HGNC Symbol;Acc:HGNC:7007]  
729 RAD51L3-RFFL N/A  
730 RAD54L RAD54-like (*S. cerevisiae*) [Source:HGNC Symbol;Acc:HGNC:9826]  
731 RAMP2 receptor activity modifying protein 2 [Source:HGNC Symbol;Acc:HGNC:9844]  
732 RAP1GAP2 RAP1 GTPase activating protein 2 [Source:HGNC Symbol;Acc:HGNC:29176]  
733 RAP2C RAP2C, member of RAS oncogene family [Source:HGNC Symbol;Acc:HGNC:21165]  
734 RAPGEF3 Rap guanine nucleotide exchange factor 3 [Source:HGNC Symbol;Acc:HGNC:16629]  
735 RARA retinoic acid receptor alpha [Source:HGNC Symbol;Acc:HGNC:9864]  
736 RARRES1 retinoic acid receptor responder 1 [Source:HGNC Symbol;Acc:HGNC:9867]  
737 RASAL2 RAS protein activator like 2 [Source:HGNC Symbol;Acc:HGNC:9874]  
738 RASGRF2 Ras protein specific guanine nucleotide releasing factor 2 [Source:HGNC Symbol;Acc:HGNC:9876]  
739 RASGRP1 RAS guanyl releasing protein 1 [Source:HGNC Symbol;Acc:HGNC:9878]  
740 RBM15 RNA binding motif protein 15 [Source:HGNC Symbol;Acc:HGNC:14959]  
741 RBM8A RNA binding motif protein 8A [Source:HGNC Symbol;Acc:HGNC:9905]  
742 RCAN3 RCAN family member 3 [Source:HGNC Symbol;Acc:HGNC:3042]  
743 RCSD1 RCSD domain containing 1 [Source:HGNC Symbol;Acc:HGNC:28310]  
744 RELL2 RELT like 2 [Source:HGNC Symbol;Acc:HGNC:26902]  
745 REM1 RRAD and GEM like GTPase 1 [Source:HGNC Symbol;Acc:HGNC:15922]  
746 REV3L REV3 like, DNA directed polymerase zeta catalytic subunit [Source:HGNC Symbol;Acc:HGNC:9968]  
RFFL ring finger and FYVE like domain containing E3 ubiquitin protein ligase [Source:HGNC  
747 Symbol;Acc:HGNC:24821]  
748 RFPL1 ret finger protein like 1 [Source:HGNC Symbol;Acc:HGNC:9977]  
749 RFX4 regulatory factor X4 [Source:HGNC Symbol;Acc:HGNC:9985]  
750 RGL4 ral guanine nucleotide dissociation stimulator like 4 [Source:HGNC Symbol;Acc:HGNC:31911]  
751 RGS7 regulator of G-protein signaling 7 [Source:HGNC Symbol;Acc:HGNC:10003]  
752 RHOF ras homolog family member F, filopodia associated [Source:HGNC Symbol;Acc:HGNC:15703]  
753 RHOQ ras homolog family member Q [Source:HGNC Symbol;Acc:HGNC:17736]  
754 RNASE11 ribonuclease A family member 11 (inactive) [Source:HGNC Symbol;Acc:HGNC:19269]  
755 RNASE12 ribonuclease A family member 12 (inactive) [Source:HGNC Symbol;Acc:HGNC:24211]

756 RNASEH1 ribonuclease H1 [Source:HGNC Symbol;Acc:HGNC:18466]  
757 RNF103 ring finger protein 103 [Source:HGNC Symbol;Acc:HGNC:12859]  
758 RNF123 ring finger protein 123 [Source:HGNC Symbol;Acc:HGNC:21148]  
759 RNF157 ring finger protein 157 [Source:HGNC Symbol;Acc:HGNC:29402]  
760 RNF217 ring finger protein 217 [Source:HGNC Symbol;Acc:HGNC:21487]  
761 RNF219 ring finger protein 219 [Source:HGNC Symbol;Acc:HGNC:20308]  
762 RNF31 ring finger protein 31 [Source:HGNC Symbol;Acc:HGNC:16031]  
763 RNF43 ring finger protein 43 [Source:HGNC Symbol;Acc:HGNC:18505]  
764 RNPEP arginyl aminopeptidase [Source:HGNC Symbol;Acc:HGNC:10078]  
765 RORA RAR related orphan receptor A [Source:HGNC Symbol;Acc:HGNC:10258]  
766 RP1-228P16.5 N/A  
767 RP11-131H24.4 N/A  
768 RP11-192H23.4 N/A  
769 RP11-41O4.1 LOC101927481  
770 RP11-47I22.3 uncharacterized LOC400221 [Source:EntrezGene;Acc:400221]  
771 RP11-650K20.3 N/A  
772 RPA3 replication protein A3 [Source:HGNC Symbol;Acc:HGNC:10291]  
773 RPL26L1 ribosomal protein L26 like 1 [Source:HGNC Symbol;Acc:HGNC:17050]  
774 RPL38 ribosomal protein L38 [Source:HGNC Symbol;Acc:HGNC:10349]  
775 RPL6 ribosomal protein L6 [Source:HGNC Symbol;Acc:HGNC:10362]  
776 RPS8 ribosomal protein S8 [Source:HGNC Symbol;Acc:HGNC:10441]  
777 RPTOR regulatory associated protein of MTOR complex 1 [Source:HGNC Symbol;Acc:HGNC:30287]  
778 RSPH1 radial spoke head 1 homolog [Source:HGNC Symbol;Acc:HGNC:12371]  
779 RSRC1 arginine and serine rich coiled-coil 1 [Source:HGNC Symbol;Acc:HGNC:24152]  
780 RTP1 receptor transporter protein 1 [Source:HGNC Symbol;Acc:HGNC:28580]  
781 RUNDC3A RUN domain containing 3A [Source:HGNC Symbol;Acc:HGNC:16984]  
782 RUSC1 RUN and SH3 domain containing 1 [Source:HGNC Symbol;Acc:HGNC:17153]  
783 RUVBL1 RuvB like AAA ATPase 1 [Source:HGNC Symbol;Acc:HGNC:10474]  
784 S100A1 S100 calcium binding protein A1 [Source:HGNC Symbol;Acc:HGNC:10486]  
785 SARM1 sterile alpha and TIR motif containing 1 [Source:HGNC Symbol;Acc:HGNC:17074]

786 SATB2 SATB homeobox 2 [Source:HGNC Symbol;Acc:HGNC:21637]  
787 SBF2 SET binding factor 2 [Source:HGNC Symbol;Acc:HGNC:2135]  
788 SCARA5 scavenger receptor class A member 5 [Source:HGNC Symbol;Acc:HGNC:28701]  
789 SCEL sciellin [Source:HGNC Symbol;Acc:HGNC:10573]  
790 SCIMP SLP adaptor and CSK interacting membrane protein [Source:HGNC Symbol;Acc:HGNC:33504]  
791 SCN1A sodium voltage-gated channel alpha subunit 1 [Source:HGNC Symbol;Acc:HGNC:10585]  
792 SCN9A sodium voltage-gated channel alpha subunit 9 [Source:HGNC Symbol;Acc:HGNC:10597]  
793 SCUBE1 signal peptide, CUB domain and EGF like domain containing 1 [Source:HGNC Symbol;Acc:HGNC:13441]  
794 SCYL3 SCY1 like pseudokinase 3 [Source:HGNC Symbol;Acc:HGNC:19285]  
795 SDPR serum deprivation response [Source:HGNC Symbol;Acc:HGNC:10690]  
796 SEC14L4 SEC14 like lipid binding 4 [Source:HGNC Symbol;Acc:HGNC:20627]  
797 SEC24B SEC24 homolog B, COPII coat complex component [Source:HGNC Symbol;Acc:HGNC:10704]  
798 SEC63 SEC63 homolog, protein translocation regulator [Source:HGNC Symbol;Acc:HGNC:21082]  
799 SELO selenoprotein O [Source:HGNC Symbol;Acc:HGNC:30395]  
800 SEMA6A semaphorin 6A [Source:HGNC Symbol;Acc:HGNC:10738]  
801 SEPN1 selenoprotein N [Source:HGNC Symbol;Acc:HGNC:15999]  
802 SEPT2 septin 2 [Source:HGNC Symbol;Acc:HGNC:7729]  
803 SEPT3 septin 3 [Source:HGNC Symbol;Acc:HGNC:10750]  
804 SERHL2 serine hydrolase-like 2 [Source:HGNC Symbol;Acc:HGNC:29446]  
805 SERPINA9 serpin family A member 9 [Source:HGNC Symbol;Acc:HGNC:15995]  
806 SESN3 sestrin 3 [Source:HGNC Symbol;Acc:HGNC:23060]  
807 SFTPD surfactant protein D [Source:HGNC Symbol;Acc:HGNC:10803]  
808 SGK494 uncharacterized serine/threonine-protein kinase SgK494 [Source:EntrezGene;Acc:124923]  
809 SGMS1 sphingomyelin synthase 1 [Source:HGNC Symbol;Acc:HGNC:29799]  
810 SGMS2 sphingomyelin synthase 2 [Source:HGNC Symbol;Acc:HGNC:28395]  
811 SH3BP1 SH3 domain binding protein 1 [Source:HGNC Symbol;Acc:HGNC:10824]  
812 SHF Src homology 2 domain containing F [Source:HGNC Symbol;Acc:HGNC:25116]  
813 SHISA9 shisa family member 9 [Source:HGNC Symbol;Acc:HGNC:37231]  
814 SHPRH SNF2 histone linker PHD RING helicase [Source:HGNC Symbol;Acc:HGNC:19336]  
815 SKOR1 SKI family transcriptional corepressor 1 [Source:HGNC Symbol;Acc:HGNC:21326]

816 SLC12A5 solute carrier family 12 member 5 [Source:HGNC Symbol;Acc:HGNC:13818]  
817 SLC16A1 solute carrier family 16 member 1 [Source:HGNC Symbol;Acc:HGNC:10922]  
818 SLC16A10 solute carrier family 16 member 10 [Source:HGNC Symbol;Acc:HGNC:17027]  
819 SLC16A12 solute carrier family 16 member 12 [Source:HGNC Symbol;Acc:HGNC:23094]  
820 SLC16A4 solute carrier family 16 member 4 [Source:HGNC Symbol;Acc:HGNC:10925]  
821 SLC16A6 solute carrier family 16 member 6 [Source:HGNC Symbol;Acc:HGNC:10927]  
822 SLC17A6 solute carrier family 17 member 6 [Source:HGNC Symbol;Acc:HGNC:16703]  
823 SLC18A2 solute carrier family 18 member A2 [Source:HGNC Symbol;Acc:HGNC:10935]  
824 SLC1A2 solute carrier family 1 member 2 [Source:HGNC Symbol;Acc:HGNC:10940]  
825 SLC1A5 solute carrier family 1 member 5 [Source:HGNC Symbol;Acc:HGNC:10943]  
826 SLC1A7 solute carrier family 1 member 7 [Source:HGNC Symbol;Acc:HGNC:10945]  
827 SLC20A2 solute carrier family 20 member 2 [Source:HGNC Symbol;Acc:HGNC:10947]  
828 SLC22A4 solute carrier family 22 member 4 [Source:HGNC Symbol;Acc:HGNC:10968]  
829 SLC22A5 solute carrier family 22 member 5 [Source:HGNC Symbol;Acc:HGNC:10969]  
830 SLC24A3 solute carrier family 24 member 3 [Source:HGNC Symbol;Acc:HGNC:10977]  
831 SLC25A24 solute carrier family 25 member 24 [Source:HGNC Symbol;Acc:HGNC:20662]  
832 SLC25A29 solute carrier family 25 member 29 [Source:HGNC Symbol;Acc:HGNC:20116]  
833 SLC28A2 solute carrier family 28 member 2 [Source:HGNC Symbol;Acc:HGNC:11002]  
834 SLC35A4 solute carrier family 35 member A4 [Source:HGNC Symbol;Acc:HGNC:20753]  
835 SLC46A1 solute carrier family 46 member 1 [Source:HGNC Symbol;Acc:HGNC:30521]  
836 SLC4A9 solute carrier family 4 member 9 [Source:HGNC Symbol;Acc:HGNC:11035]  
837 SLC5A10 solute carrier family 5 member 10 [Source:HGNC Symbol;Acc:HGNC:23155]  
838 SLC5A9 solute carrier family 5 member 9 [Source:HGNC Symbol;Acc:HGNC:22146]  
839 SLC6A6 solute carrier family 6 member 6 [Source:HGNC Symbol;Acc:HGNC:11052]  
840 SLC7A11 solute carrier family 7 member 11 [Source:HGNC Symbol;Acc:HGNC:11059]  
841 SLC7A14 solute carrier family 7 member 14 [Source:HGNC Symbol;Acc:HGNC:29326]  
842 SLIT3 slit guidance ligand 3 [Source:HGNC Symbol;Acc:HGNC:11087]  
843 SLTM SAFB like transcription modulator [Source:HGNC Symbol;Acc:HGNC:20709]  
SMARCAL1 SWI/SNF related, matrix associated, actin dependent regulator of chromatin, subfamily a like 1  
844 [Source:HGNC Symbol;Acc:HGNC:11102]

|             |                                                                                                   |
|-------------|---------------------------------------------------------------------------------------------------|
| SMARCD3     | SWI/SNF related, matrix associated, actin dependent regulator of chromatin, subfamily d, member 3 |
| 845         | [Source:HGNC Symbol;Acc:HGNC:11108]                                                               |
| 846 SMIM2   | small integral membrane protein 2 [Source:HGNC Symbol;Acc:HGNC:28776]                             |
| 847 SMIM22  | small integral membrane protein 22 [Source:HGNC Symbol;Acc:HGNC:48329]                            |
| 848 SMPDL3B | sphingomyelin phosphodiesterase acid like 3B [Source:HGNC Symbol;Acc:HGNC:21416]                  |
| 849 SMTN    | smoothelin [Source:HGNC Symbol;Acc:HGNC:11126]                                                    |
| 850 SMURF1  | SMAD specific E3 ubiquitin protein ligase 1 [Source:HGNC Symbol;Acc:HGNC:16807]                   |
| 851 SNAI3   | snail family transcriptional repressor 3 [Source:HGNC Symbol;Acc:HGNC:18411]                      |
| 852 SNCA    | synuclein alpha [Source:HGNC Symbol;Acc:HGNC:11138]                                               |
| 853 SNX20   | sorting nexin 20 [Source:HGNC Symbol;Acc:HGNC:30390]                                              |
| 854 SP140   | SP140 nuclear body protein [Source:HGNC Symbol;Acc:HGNC:17133]                                    |
| 855 SPAG5   | sperm associated antigen 5 [Source:HGNC Symbol;Acc:HGNC:13452]                                    |
| 856 SPARC   | secreted protein acidic and cysteine rich [Source:HGNC Symbol;Acc:HGNC:11219]                     |
| 857 SPATA21 | spermatogenesis associated 21 [Source:HGNC Symbol;Acc:HGNC:28026]                                 |
| 858 SPEG    | SPEG complex locus [Source:HGNC Symbol;Acc:HGNC:16901]                                            |
| 859 SPRY4   | SPRY domain containing 4 [Source:HGNC Symbol;Acc:HGNC:27468]                                      |
| 860 SPTY2D1 | SPT2 chromatin protein domain containing 1 [Source:HGNC Symbol;Acc:HGNC:26818]                    |
| 861 SREBF2  | sterol regulatory element binding transcription factor 2 [Source:HGNC Symbol;Acc:HGNC:11290]      |
| 862 SRPK1   | SRSF protein kinase 1 [Source:HGNC Symbol;Acc:HGNC:11305]                                         |
| 863 SRPX    | sushi repeat containing protein, X-linked [Source:HGNC Symbol;Acc:HGNC:11309]                     |
| 864 SRRM2   | serine/arginine repetitive matrix 2 [Source:HGNC Symbol;Acc:HGNC:16639]                           |
| 865 SSBP1   | single stranded DNA binding protein 1 [Source:HGNC Symbol;Acc:HGNC:11317]                         |
| 866 SSR4    | signal sequence receptor subunit 4 [Source:HGNC Symbol;Acc:HGNC:11326]                            |
| 867 ST7     | suppression of tumorigenicity 7 [Source:HGNC Symbol;Acc:HGNC:11351]                               |
| 868 ST7-OT4 | ST7 overlapping transcript 4 [Source:HGNC Symbol;Acc:HGNC:18835]                                  |
| 869 STAG3   | stromal antigen 3 [Source:HGNC Symbol;Acc:HGNC:11356]                                             |
| 870 STAM    | signal transducing adaptor molecule [Source:HGNC Symbol;Acc:HGNC:11357]                           |
| 871 STAR    | steroidogenic acute regulatory protein [Source:HGNC Symbol;Acc:HGNC:11359]                        |
| 872 STEAP3  | STEAP3 metalloreductase [Source:HGNC Symbol;Acc:HGNC:24592]                                       |
| 873 STEAP4  | STEAP4 metalloreductase [Source:HGNC Symbol;Acc:HGNC:21923]                                       |

874 STRA6 stimulated by retinoic acid 6 [Source:HGNC Symbol;Acc:HGNC:30650]  
875 STX18 syntaxin 18 [Source:HGNC Symbol;Acc:HGNC:15942]  
876 STXBP5 syntaxin binding protein 5 [Source:HGNC Symbol;Acc:HGNC:19665]  
877 SULF2 sulfatase 2 [Source:HGNC Symbol;Acc:HGNC:20392]  
878 SUPT4H1 SPT4 homolog, DSIF elongation factor subunit [Source:HGNC Symbol;Acc:HGNC:11467]  
879 SUPT6H SPT6 homolog, histone chaperone [Source:HGNC Symbol;Acc:HGNC:11470]  
880 SURF2 surfait 2 [Source:HGNC Symbol;Acc:HGNC:11475]  
881 SUV39H1 suppressor of variegation 3-9 homolog 1 [Source:HGNC Symbol;Acc:HGNC:11479]  
882 SYMPK symplekin [Source:HGNC Symbol;Acc:HGNC:22935]  
883 SYNM synemin [Source:HGNC Symbol;Acc:HGNC:24466]  
884 SYP synaptophysin [Source:HGNC Symbol;Acc:HGNC:11506]  
885 SYS1 SYS1, golgi trafficking protein [Source:HGNC Symbol;Acc:HGNC:16162]  
886 SYVN1 synoviolin 1 [Source:HGNC Symbol;Acc:HGNC:20738]  
887 SZRD1 SUZ RNA binding domain containing 1 [Source:HGNC Symbol;Acc:HGNC:30232]  
888 TAC4 tachykinin 4 (hemokinin) [Source:HGNC Symbol;Acc:HGNC:16641]  
889 TAF1L TATA-box binding protein associated factor 1 like [Source:HGNC Symbol;Acc:HGNC:18056]  
890 TAF6L TATA-box binding protein associated factor 6 like [Source:HGNC Symbol;Acc:HGNC:17305]  
891 TAP1 transporter 1, ATP binding cassette subfamily B member [Source:HGNC Symbol;Acc:HGNC:43]  
892 TBC1D14 TBC1 domain family member 14 [Source:HGNC Symbol;Acc:HGNC:29246]  
893 TBX2 T-box 2 [Source:HGNC Symbol;Acc:HGNC:11597]  
894 TCEB2 transcription elongation factor B subunit 2 [Source:HGNC Symbol;Acc:HGNC:11619]  
895 TCF21 transcription factor 21 [Source:HGNC Symbol;Acc:HGNC:11632]  
896 TCL1A T-cell leukemia/lymphoma 1A [Source:HGNC Symbol;Acc:HGNC:11648]  
897 TEFM transcription elongation factor, mitochondrial [Source:HGNC Symbol;Acc:HGNC:26223]  
898 TEX261 testis expressed 261 [Source:HGNC Symbol;Acc:HGNC:30712]  
899 TGFB3 transforming growth factor beta 3 [Source:HGNC Symbol;Acc:HGNC:11769]  
900 TGFBR3L transforming growth factor beta receptor 3 like [Source:HGNC Symbol;Acc:HGNC:44152]  
901 THAP7 THAP domain containing 7 [Source:HGNC Symbol;Acc:HGNC:23190]  
902 THAP9 THAP domain containing 9 [Source:HGNC Symbol;Acc:HGNC:23192]  
903 THBS3 thrombospondin 3 [Source:HGNC Symbol;Acc:HGNC:11787]

904 THBS4 thrombospondin 4 [Source:HGNC Symbol;Acc:HGNC:11788]  
905 THSD7A thrombospondin type 1 domain containing 7A [Source:HGNC Symbol;Acc:HGNC:22207]  
906 THUMPD3 THUMP domain containing 3 [Source:HGNC Symbol;Acc:HGNC:24493]  
907 TIAM2 T-cell lymphoma invasion and metastasis 2 [Source:HGNC Symbol;Acc:HGNC:11806]  
908 TIRAP TIR domain containing adaptor protein [Source:HGNC Symbol;Acc:HGNC:17192]  
909 TK2 thymidine kinase 2, mitochondrial [Source:HGNC Symbol;Acc:HGNC:11831]  
910 TLN2 talin 2 [Source:HGNC Symbol;Acc:HGNC:15447]  
911 TLX1 T-cell leukemia homeobox 1 [Source:HGNC Symbol;Acc:HGNC:5056]  
912 TM4SF1 transmembrane 4 L six family member 1 [Source:HGNC Symbol;Acc:HGNC:11853]  
913 TM4SF19 transmembrane 4 L six family member 19 [Source:HGNC Symbol;Acc:HGNC:25167]  
914 TMC5 transmembrane channel like 5 [Source:HGNC Symbol;Acc:HGNC:22999]  
915 TMED2 transmembrane p24 trafficking protein 2 [Source:HGNC Symbol;Acc:HGNC:16996]  
916 TMEM11 transmembrane protein 11 [Source:HGNC Symbol;Acc:HGNC:16823]  
917 TMEM132D transmembrane protein 132D [Source:HGNC Symbol;Acc:HGNC:29411]  
918 TMEM138 transmembrane protein 138 [Source:HGNC Symbol;Acc:HGNC:26944]  
919 TMEM139 transmembrane protein 139 [Source:HGNC Symbol;Acc:HGNC:22058]  
920 TMEM147 transmembrane protein 147 [Source:HGNC Symbol;Acc:HGNC:30414]  
921 TMEM167B transmembrane protein 167B [Source:HGNC Symbol;Acc:HGNC:30187]  
922 TMEM18 transmembrane protein 18 [Source:HGNC Symbol;Acc:HGNC:25257]  
923 TMEM186 transmembrane protein 186 [Source:HGNC Symbol;Acc:HGNC:24530]  
924 TMEM200C transmembrane protein 200C [Source:HGNC Symbol;Acc:HGNC:37208]  
925 TMEM202 transmembrane protein 202 [Source:HGNC Symbol;Acc:HGNC:33733]  
926 TMEM220 transmembrane protein 220 [Source:HGNC Symbol;Acc:HGNC:33757]  
927 TMEM229A transmembrane protein 229A [Source:HGNC Symbol;Acc:HGNC:37279]  
928 TMEM246 transmembrane protein 246 [Source:HGNC Symbol;Acc:HGNC:28180]  
929 TMEM25 transmembrane protein 25 [Source:HGNC Symbol;Acc:HGNC:25890]  
930 TMEM254 transmembrane protein 254 [Source:HGNC Symbol;Acc:HGNC:25804]  
931 TMEM260 transmembrane protein 260 [Source:HGNC Symbol;Acc:HGNC:20185]  
932 TMEM30B transmembrane protein 30B [Source:HGNC Symbol;Acc:HGNC:27254]  
933 TMEM53 transmembrane protein 53 [Source:HGNC Symbol;Acc:HGNC:26186]



934 TMEM54 transmembrane protein 54 [Source:HGNC Symbol;Acc:HGNC:24143]  
935 TMEM69 transmembrane protein 69 [Source:HGNC Symbol;Acc:HGNC:28035]  
936 TMEM87A transmembrane protein 87A [Source:HGNC Symbol;Acc:HGNC:24522]  
937 TMEM8B transmembrane protein 8B [Source:HGNC Symbol;Acc:HGNC:21427]  
938 TMEM91 transmembrane protein 91 [Source:HGNC Symbol;Acc:HGNC:32393]  
939 TMSB10 thymosin beta 10 [Source:HGNC Symbol;Acc:HGNC:11879]  
940 TMSB15B thymosin beta 15B [Source:HGNC Symbol;Acc:HGNC:28612]  
941 TNFAIP3 TNF alpha induced protein 3 [Source:HGNC Symbol;Acc:HGNC:11896]  
942 TNFRSF14 TNF receptor superfamily member 14 [Source:HGNC Symbol;Acc:HGNC:11912]  
943 TNK2 tyrosine kinase non receptor 2 [Source:HGNC Symbol;Acc:HGNC:19297]  
944 TNKS tankyrase [Source:HGNC Symbol;Acc:HGNC:11941]  
945 TNPO1 transportin 1 [Source:HGNC Symbol;Acc:HGNC:6401]  
946 TNR tenascin R [Source:HGNC Symbol;Acc:HGNC:11953]  
947 TOMM20L translocase of outer mitochondrial membrane 20 like [Source:HGNC Symbol;Acc:HGNC:33752]  
948 TOP1 topoisomerase (DNA) I [Source:HGNC Symbol;Acc:HGNC:11986]  
949 TOR2A torsin family 2 member A [Source:HGNC Symbol;Acc:HGNC:11996]  
950 TPBGL trophoblast glycoprotein-like [Source:HGNC Symbol;Acc:HGNC:44159]  
951 TPGS1 tubulin polyglutamylase complex subunit 1 [Source:HGNC Symbol;Acc:HGNC:25058]  
952 TPM1 tropomyosin 1 (alpha) [Source:HGNC Symbol;Acc:HGNC:12010]  
953 TPP1 tripeptidyl peptidase 1 [Source:HGNC Symbol;Acc:HGNC:2073]  
954 TPRG1 tumor protein p63 regulated 1 [Source:HGNC Symbol;Acc:HGNC:24759]  
955 TRAF3IP2 TRAF3 interacting protein 2 [Source:HGNC Symbol;Acc:HGNC:1343]  
956 TREH trehalase [Source:HGNC Symbol;Acc:HGNC:12266]  
957 TRHDE thyrotropin releasing hormone degrading enzyme [Source:HGNC Symbol;Acc:HGNC:30748]  
958 TRIM31 tripartite motif containing 31 [Source:HGNC Symbol;Acc:HGNC:16289]  
959 TRIM39 tripartite motif containing 39 [Source:HGNC Symbol;Acc:HGNC:10065]  
960 TRIM7 tripartite motif containing 7 [Source:HGNC Symbol;Acc:HGNC:16278]  
961 TRIP10 thyroid hormone receptor interactor 10 [Source:HGNC Symbol;Acc:HGNC:12304]  
962 TRMT61B tRNA methyltransferase 61B [Source:HGNC Symbol;Acc:HGNC:26070]  
963 TRNAU1AP tRNA selenocysteine 1 associated protein 1 [Source:HGNC Symbol;Acc:HGNC:30813]

964 TROAP trophinin associated protein [Source:HGNC Symbol;Acc:HGNC:12327]  
TRPM8 transient receptor potential cation channel subfamily M member 8 [Source:HGNC  
965 Symbol;Acc:HGNC:17961]  
TRPV6 transient receptor potential cation channel subfamily V member 6 [Source:HGNC  
966 Symbol;Acc:HGNC:14006]  
967 TTC16 tetratricopeptide repeat domain 16 [Source:HGNC Symbol;Acc:HGNC:26536]  
968 TTC23L tetratricopeptide repeat domain 23 like [Source:HGNC Symbol;Acc:HGNC:26355]  
969 TTC28 tetratricopeptide repeat domain 28 [Source:HGNC Symbol;Acc:HGNC:29179]  
970 TTC36 tetratricopeptide repeat domain 36 [Source:HGNC Symbol;Acc:HGNC:33708]  
971 TTC39A tetratricopeptide repeat domain 39A [Source:HGNC Symbol;Acc:HGNC:18657]  
972 TTLL10 tubulin tyrosine ligase like 10 [Source:HGNC Symbol;Acc:HGNC:26693]  
973 TTN titin [Source:HGNC Symbol;Acc:HGNC:12403]  
974 UBE2D4 ubiquitin conjugating enzyme E2 D4 (putative) [Source:HGNC Symbol;Acc:HGNC:21647]  
975 UBE4A ubiquitination factor E4A [Source:HGNC Symbol;Acc:HGNC:12499]  
976 UBTF upstream binding transcription factor, RNA polymerase I [Source:HGNC Symbol;Acc:HGNC:12511]  
977 UBXN11 UBX domain protein 11 [Source:HGNC Symbol;Acc:HGNC:30600]  
978 UBXN6 UBX domain protein 6 [Source:HGNC Symbol;Acc:HGNC:14928]  
979 UCHL1 ubiquitin C-terminal hydrolase L1 [Source:HGNC Symbol;Acc:HGNC:12513]  
980 UCK2 uridine-cytidine kinase 2 [Source:HGNC Symbol;Acc:HGNC:12562]  
981 UNC5C unc-5 netrin receptor C [Source:HGNC Symbol;Acc:HGNC:12569]  
982 UPB1 beta-ureidopropionase 1 [Source:HGNC Symbol;Acc:HGNC:16297]  
UQCRFS1 ubiquinol-cytochrome c reductase, Rieske iron-sulfur polypeptide 1 [Source:HGNC  
983 Symbol;Acc:HGNC:12587]  
984 USP3 ubiquitin specific peptidase 3 [Source:HGNC Symbol;Acc:HGNC:12626]  
985 USP30 ubiquitin specific peptidase 30 [Source:HGNC Symbol;Acc:HGNC:20065]  
986 USP54 ubiquitin specific peptidase 54 [Source:HGNC Symbol;Acc:HGNC:23513]  
987 USP6NL USP6 N-terminal like [Source:HGNC Symbol;Acc:HGNC:16858]  
988 USP8 ubiquitin specific peptidase 8 [Source:HGNC Symbol;Acc:HGNC:12631]  
989 UST uronyl 2-sulfotransferase [Source:HGNC Symbol;Acc:HGNC:17223]  
990 UVRAG UV radiation resistance associated [Source:HGNC Symbol;Acc:HGNC:12640]

991 VAC14 Vac14, PIKFYVE complex component [Source:HGNC Symbol;Acc:HGNC:25507]  
992 VASH1 vasohibin 1 [Source:HGNC Symbol;Acc:HGNC:19964]  
993 VIM vimentin [Source:HGNC Symbol;Acc:HGNC:12692]  
994 VIPR1 vasoactive intestinal peptide receptor 1 [Source:HGNC Symbol;Acc:HGNC:12694]  
995 VLDLR very low density lipoprotein receptor [Source:HGNC Symbol;Acc:HGNC:12698]  
996 WARS tryptophanyl-tRNA synthetase [Source:HGNC Symbol;Acc:HGNC:12729]  
997 WDR11 WD repeat domain 11 [Source:HGNC Symbol;Acc:HGNC:13831]  
998 WDR3 WD repeat domain 3 [Source:HGNC Symbol;Acc:HGNC:12755]  
999 WDR74 WD repeat domain 74 [Source:HGNC Symbol;Acc:HGNC:25529]  
1000 WEE2 WEE1 homolog 2 [Source:HGNC Symbol;Acc:HGNC:19684]  
1001 WIBG PYM homolog 1, exon junction complex associated factor [Source:HGNC Symbol;Acc:HGNC:30258]  
1002 WLS wntless Wnt ligand secretion mediator [Source:HGNC Symbol;Acc:HGNC:30238]  
1003 WNT2B Wnt family member 2B [Source:HGNC Symbol;Acc:HGNC:12781]  
1004 WRN Werner syndrome RecQ like helicase [Source:HGNC Symbol;Acc:HGNC:12791]  
1005 WT1 Wilms tumor 1 [Source:HGNC Symbol;Acc:HGNC:12796]  
1006 XKR8 XK related 8 [Source:HGNC Symbol;Acc:HGNC:25508]  
XPC XPC complex subunit, DNA damage recognition and repair factor [Source:HGNC Symbol;Acc:HGNC:12816]  
1007  
1008 XRCC1 X-ray repair cross complementing 1 [Source:HGNC Symbol;Acc:HGNC:12828]  
1009 YEATS2 YEATS domain containing 2 [Source:HGNC Symbol;Acc:HGNC:25489]  
1010 YIPF7 Yip1 domain family member 7 [Source:HGNC Symbol;Acc:HGNC:26825]  
1011 YPEL1 yippee like 1 [Source:HGNC Symbol;Acc:HGNC:12845]  
1012 YPEL3 yippee like 3 [Source:HGNC Symbol;Acc:HGNC:18327]  
1013 YPEL4 yippee like 4 [Source:HGNC Symbol;Acc:HGNC:18328]  
1014 ZBED3 zinc finger BED-type containing 3 [Source:HGNC Symbol;Acc:HGNC:20711]  
1015 ZBTB21 zinc finger and BTB domain containing 21 [Source:HGNC Symbol;Acc:HGNC:13083]  
1016 ZCCHC24 zinc finger CCHC-type containing 24 [Source:HGNC Symbol;Acc:HGNC:26911]  
1017 ZFAT zinc finger and AT-hook domain containing [Source:HGNC Symbol;Acc:HGNC:19899]  
1018 ZFHX2 zinc finger homeobox 2 [Source:HGNC Symbol;Acc:HGNC:20152]  
1019 ZFYVE9 zinc finger FYVE-type containing 9 [Source:HGNC Symbol;Acc:HGNC:6775]

|              |                                                                                  |
|--------------|----------------------------------------------------------------------------------|
| 1020 ZHX3    | zinc fingers and homeoboxes 3 [Source:HGNC Symbol;Acc:HGNC:15935]                |
| 1021 ZIM2    | zinc finger imprinted 2 [Source:HGNC Symbol;Acc:HGNC:12875]                      |
| 1022 ZKSCAN7 | zinc finger with KRAB and SCAN domains 7 [Source:HGNC Symbol;Acc:HGNC:12955]     |
| 1023 ZNF205  | zinc finger protein 205 [Source:HGNC Symbol;Acc:HGNC:12996]                      |
| 1024 ZNF217  | zinc finger protein 217 [Source:HGNC Symbol;Acc:HGNC:13009]                      |
| 1025 ZNF22   | zinc finger protein 22 [Source:HGNC Symbol;Acc:HGNC:13012]                       |
| 1026 ZNF224  | zinc finger protein 224 [Source:HGNC Symbol;Acc:HGNC:13017]                      |
| 1027 ZNF232  | zinc finger protein 232 [Source:HGNC Symbol;Acc:HGNC:13026]                      |
| 1028 ZNF248  | zinc finger protein 248 [Source:HGNC Symbol;Acc:HGNC:13041]                      |
| 1029 ZNF32   | zinc finger protein 32 [Source:HGNC Symbol;Acc:HGNC:13095]                       |
| 1030 ZNF462  | zinc finger protein 462 [Source:HGNC Symbol;Acc:HGNC:21684]                      |
| 1031 ZNF497  | zinc finger protein 497 [Source:HGNC Symbol;Acc:HGNC:23714]                      |
| 1032 ZNF512B | zinc finger protein 512B [Source:HGNC Symbol;Acc:HGNC:29212]                     |
| 1033 ZNF652  | zinc finger protein 652 [Source:HGNC Symbol;Acc:HGNC:29147]                      |
| 1034 ZNF687  | zinc finger protein 687 [Source:HGNC Symbol;Acc:HGNC:29277]                      |
| 1035 ZNF710  | zinc finger protein 710 [Source:HGNC Symbol;Acc:HGNC:25352]                      |
| 1036 ZNF75A  | zinc finger protein 75a [Source:HGNC Symbol;Acc:HGNC:13146]                      |
| 1037 ZNF793  | zinc finger protein 793 [Source:HGNC Symbol;Acc:HGNC:33115]                      |
| 1038 ZNFX1   | zinc finger NFX1-type containing 1 [Source:HGNC Symbol;Acc:HGNC:29271]           |
| 1039 ZNRD1   | zinc ribbon domain containing 1 [Source:HGNC Symbol;Acc:HGNC:13182]              |
| 1040 ZNRF1   | zinc and ring finger 1 [Source:HGNC Symbol;Acc:HGNC:18452]                       |
| 1041 ZP2     | zona pellucida glycoprotein 2 [Source:HGNC Symbol;Acc:HGNC:13188]                |
| 1042 ZP4     | zona pellucida glycoprotein 4 [Source:HGNC Symbol;Acc:HGNC:15770]                |
| 1043 ZRANB2  | zinc finger RANBP2-type containing 2 [Source:HGNC Symbol;Acc:HGNC:13058]         |
| 1044 ZSCAN5A | zinc finger and SCAN domain containing 5A [Source:HGNC Symbol;Acc:HGNC:23710]    |
| 1045 ZYG11A  | zyg-11 family member A, cell cycle regulator [Source:HGNC Symbol;Acc:HGNC:32058] |
