# Supplementary material
Source: PubMed Central journal article supplement (PMC7610982)
Supplement: EMS126982-supplement-Supplementary_Table4.pdf [file EMS126982-supplement-Supplementary_Table4.pdf]

## 5'-UTR overlapping genes

| Uniprot ID | Gene Name | Description                                                                   |
|------------|-----------|-------------------------------------------------------------------------------|
| P04217     | A1BG      | Alpha-1B-glycoprotein                                                         |
| Q9NP78     | ABCB9     | ATP-binding cassette sub-family B member 9                                    |
| Q8TB40     | ABHD4     | Protein ABHD4                                                                 |
| Q6ZMM2     | ADAMTSL5  | ADAMTS-like protein 5                                                         |
| P07327     | ADH1A     | Alcohol dehydrogenase 1A                                                      |
| Q15848     | ADIPOQ    | Adiponectin                                                                   |
| A8K660     | ADIPOQ    |                                                                               |
| Q15847     | ADIRF     | Adipogenesis regulatory factor                                                |
| P30542     | ADORA1    | Adenosine receptor A1                                                         |
| P29274     | ADORA2A   | Adenosine receptor A2a                                                        |
| Q9BRR6     | ADPGK     | ADP-dependent glucokinase                                                     |
| P54922     | ADPRH     | [Protein ADP-ribosylarginine] hydrolase                                       |
| Q9NX46     | ADPRHL2   | Poly(ADP-ribose) glycohydrolase ARH3                                          |
| Q53H12     | AGK       | Acylglycerol kinase, mitochondrial                                            |
| O00116     | AGPS      | Alkyldihydroxyacetonephosphate synthase, peroxisomal                          |
| Q8N157     | AHI1      | Joubertin                                                                     |
| P35869     | AHR       | Aryl hydrocarbon receptor                                                     |
| A9YTQ3     | AHRR      | Aryl hydrocarbon receptor repressor                                           |
| O75891     | ALDH1L1   | Cytosolic 10-formyltetrahydrofolate dehydrogenase                             |
| Q5BKT4     | ALG10     | Dol-P-Glc:Glc(2)Man(9)GlcNAc(2)-PP-Dol alpha-1,2-glucosyltransferase          |
| Q5I7T1     | ALG10B    | Putative Dol-P-Glc:Glc(2)Man(9)GlcNAc(2)-PP-Dol alpha-1,2-glucosyltransferase |
| Q9UJX4     | ANAPC5    | Anaphase-promoting complex subunit 5                                          |
| P16157     | ANK1      | Ankyrin-1                                                                     |
| Q9NU02     | ANKEF1    | Ankyrin repeat and EF-hand domain-containing protein 1                        |
| Q8N9B4     | ANKRD42   | Ankyrin repeat domain-containing protein 42                                   |
| Q92572     | AP3S1     | AP-3 complex subunit sigma-1                                                  |
| O95445     | APOM      | Apolipoprotein M                                                              |
| Q92624     | APPBP2    | Amyloid protein-binding protein 2                                             |

|        |          |                                                 |
|--------|----------|-------------------------------------------------|
| Q9UKG1 | APPL1    | DCC-interacting protein 13-alpha                |
| Q8NEU8 | APPL2    | DCC-interacting protein 13-beta                 |
| Q6FGT0 | AQP9     |                                                 |
| O43315 | AQP9     | Aquaporin-9                                     |
| Q13017 | ARHGAP5  | Rho GTPase-activating protein 5                 |
| Q96DR7 | ARHGEF26 | Rho guanine nucleotide exchange factor 26       |
| Q9NR81 | ARHGEF3  | Rho guanine nucleotide exchange factor 3        |
| A8MVX0 | ARHGEF33 | Rho guanine nucleotide exchange factor 33       |
| H7C3S6 | ARHGEF33 |                                                 |
| A5YM69 | ARHGEF35 | Rho guanine nucleotide exchange factor 35       |
| A1IGU5 | ARHGEF37 | Rho guanine nucleotide exchange factor 37       |
| Q9NXL2 | ARHGEF38 | Rho guanine nucleotide exchange factor 38       |
| Q8N4T4 | ARHGEF39 | Rho guanine nucleotide exchange factor 39       |
| Q9Y4X5 | ARIH1    | E3 ubiquitin-protein ligase ARIH1               |
| Q9H672 | ASB7     | Ankyrin repeat and SOCS box protein 7           |
| P50553 | ASCL1    | Achaete-scute homolog 1                         |
| Q9NR48 | ASH1L    | Histone-lysine N-methyltransferase ASH1L        |
| O95260 | ATE1     | Arginyl-tRNA--protein transferase 1             |
| Q9Y2D1 | ATF5     | Cyclic AMP-dependent transcription factor ATF-5 |
| Q9H7F0 | ATP13A3  | Probable cation-transporting ATPase 13A3        |
| O75964 | ATP5L    | ATP synthase subunit g, mitochondrial           |
| P48047 | ATP5O    | ATP synthase subunit O, mitochondrial           |
| Q8NHE4 | ATP6V0E2 | V-type proton ATPase subunit e 2                |
| P21283 | ATP6V1C1 | V-type proton ATPase subunit C 1                |
| O14977 | AZIN1    | Antizyme inhibitor 1                            |
| Q9UBX8 | B4GALT6  | Beta-1,4-galactosyltransferase 6                |
| Q9UPM9 | B9D1     | B9 domain-containing protein 1                  |
| Q96GW7 | BCAN     | Brevican core protein                           |
| Q92843 | BCL2L2   | Bcl-2-like protein 2                            |
| Q8WUZ0 | BCL7C    | B-cell CLL/lymphoma 7 protein family member C   |

|        |            |                                                              |
|--------|------------|--------------------------------------------------------------|
| P23560 | BDNF       | Brain-derived neurotrophic factor                            |
| Q3B7T3 | BEAN1      | Protein BEAN1                                                |
| Q9Y2F9 | BTBD3      | BTB/POZ domain-containing protein 3                          |
| P62324 | BTG1       | Protein BTG1                                                 |
| Q6IBC8 | BTG1       |                                                              |
| Q8NE79 | BVES       | Blood vessel epicardial substance                            |
| O95153 | BZRAP1     | Peripheral-type benzodiazepine receptor-associated protein 1 |
| Q9H8K7 | C10orf88   | Uncharacterized protein C10orf88                             |
| A6NNL5 | C15orf61   | Uncharacterized protein C15orf61                             |
| Q96GQ5 | C16orf58   | RUS1 family protein C16orf58                                 |
| Q9BVC5 | C2orf49    | Ashwin                                                       |
| Q8IY42 | C4orf19    | Uncharacterized protein C4orf19                              |
| Q9H6K1 | C6orf106   | Uncharacterized protein C6orf106                             |
| Q96E40 | C9orf9     | Uncharacterized protein C9orf9                               |
| Q5VZ13 | C9orf91    | Transmembrane protein C9orf91                                |
| P52907 | CAPZA1     | F-actin-capping protein subunit alpha-1                      |
| Q9Y2V2 | CARHSP1    | Calcium-regulated heat-stable protein 1                      |
| P51636 | CAV2       | Caveolin-2                                                   |
| Q75N03 | CBLL1      | E3 ubiquitin-protein ligase Hakai                            |
| A1A5D9 | CCDC64B    | Bicaudal D-related protein 2                                 |
| Q96PX6 | CCDC85A    | Coiled-coil domain-containing protein 85A                    |
| Q92526 | CCT6B      | T-complex protein 1 subunit zeta-2                           |
| O15446 | CD3EAP     | DNA-directed RNA polymerase I subunit RPA34                  |
| Q00534 | CDK6       | Cyclin-dependent kinase 6                                    |
| P42771 | CDKN2A     | Cyclin-dependent kinase inhibitor 2A                         |
| Q8N726 | CDKN2A     | Tumor suppressor ARF                                         |
| G3XAG3 | CDKN2A     |                                                              |
| Q9NXV6 | CDKN2AIP   | CDKN2A-interacting protein                                   |
| Q96HQ2 | CDKN2AIPNL | CDKN2AIP N-terminal-like protein                             |
| Q92879 | CELF1      | CUGBP Elav-like family member 1                              |

|        |           |                                                       |
|--------|-----------|-------------------------------------------------------|
| Q9BZP6 | CHIA      | Acidic mammalian chitinase                            |
| Q9Y3E7 | CHMP3     | Charged multivesicular body protein 3                 |
| Q9Y3Y2 | CHTOP     | Chromatin target of PRMT1 protein                     |
| P33076 | CIITA     | MHC class II transactivator                           |
| Q9NSE2 | CISH      | Cytokine-inducible SH2-containing protein             |
| P30622 | CLIP1     | CAP-Gly domain-containing linker protein 1            |
| O75153 | CLUH      | Clustered mitochondria protein homolog                |
| F8VV52 | CNOT2     |                                                       |
| Q9NZN8 | CNOT2     | CCR4-NOT transcription complex subunit 2              |
| P39059 | COL15A1   | Collagen alpha-1(XV) chain                            |
| Q9BXS0 | COL25A1   | Collagen alpha-1(XXV) chain                           |
| P53621 | COPA      | Coatomer subunit alpha                                |
| Q9BZB8 | CPEB1     | Cytoplasmic polyadenylation element-binding protein 1 |
| Q13324 | CRHR2     | Corticotropin-releasing factor receptor 2             |
| Q13363 | CTBP1     | C-terminal-binding protein 1                          |
| Q14247 | CTTN      | Src substrate cortactin                               |
| Q8WZ74 | CTTNBP2   | Cortactin-binding protein 2                           |
| Q9P2B4 | CTTNBP2NL | CTTNBP2 N-terminal-like protein                       |
| Q13619 | CUL4A     | Cullin-4A                                             |
| O95715 | CXCL14    | C-X-C motif chemokine 14                              |
| P05108 | CYP11A1   | Cholesterol side-chain cleavage enzyme, mitochondrial |
| Q16678 | CYP1B1    | Cytochrome P450 1B1                                   |
| Q7Z449 | CYP2U1    | Cytochrome P450 2U1                                   |
| Q9Y6A2 | CYP46A1   | Cholesterol 24-hydroxylase                            |
| Q99418 | CYTH2     | Cytohesin-2                                           |
| P59103 | DAOA      | D-amino acid oxidase activator                        |
| P14868 | DARS      | Aspartate--tRNA ligase, cytoplasmic                   |
| Q6PI48 | DARS2     | Aspartate--tRNA ligase, mitochondrial                 |
| Q9BQY9 | DBNDD2    | Dysbindin domain-containing protein 2                 |
| Q14203 | DCTN1     | Dynactin subunit 1                                    |

|        |          |                                                                   |
|--------|----------|-------------------------------------------------------------------|
| Q96FC9 | DDX11    | Probable ATP-dependent DNA helicase DDX11                         |
| A8MPP1 | DDX11L8  | Putative ATP-dependent RNA helicase DDX11-like protein 8          |
| Q8TDR3 | DDX20    |                                                                   |
| Q9UHI6 | DDX20    | Probable ATP-dependent RNA helicase DDX20                         |
| Q8TB45 | DEPTOR   | DEP domain-containing mTOR-interacting protein                    |
| Q96PD7 | DGAT2    | Diacylglycerol O-acyltransferase 2                                |
| Q6IED9 | DGAT2L7P | Putative diacylglycerol O-acyltransferase 2-like protein DGAT2L7P |
| Q15392 | DHCR24   | Delta(24)-sterol reductase                                        |
| Q9UPY3 | DICER1   | Endoribonuclease Dicer                                            |
| Q12959 | DLG1     | Disks large homolog 1                                             |
| Q15700 | DLG2     | Disks large homolog 2                                             |
| Q9Y222 | DMTF1    | Cyclin-D-binding Myb-like transcription factor 1                  |
| P59910 | DNAJB13  | DnaJ homolog subfamily B member 13                                |
| Q8NHS0 | DNAJB8   | DnaJ homolog subfamily B member 8                                 |
| Q9UBS3 | DNAJB9   | DnaJ homolog subfamily B member 9                                 |
| Q9NZQ0 | DNAJC27  | DnaJ homolog subfamily C member 27                                |
| Q9ULA0 | DNPEP    | Aspartyl aminopeptidase                                           |
| O94777 | DPM2     | Dolichol phosphate-mannose biosynthesis regulatory protein        |
| Q9NY33 | DPP3     | Dipeptidyl peptidase 3                                            |
| Q9Y4J8 | DTNA     | Dystrobrevin alpha                                                |
| O43237 | DYNC1LI2 | Cytoplasmic dynein 1 light intermediate chain 2                   |
| Q8TF09 | DYNLRB2  | Dynein light chain roadblock-type 2                               |
| P42892 | ECE1     | Endothelin-converting enzyme 1                                    |
| P24530 | EDNRB    | Endothelin B receptor                                             |
| Q9NZJ5 | EIF2AK3  | Eukaryotic translation initiation factor 2-alpha kinase 3         |
| P78545 | ELF3     | ETS-related transcription factor Elf-3                            |
| O00472 | ELL2     | RNA polymerase II elongation factor ELL2                          |
| O95834 | EML2     | Echinoderm microtubule-associated protein-like 2                  |
| K7ESL7 | EML2     |                                                                   |
| P21128 | ENDOU    | Poly(U)-specific endoribonuclease                                 |

|        |           |                                                             |
|--------|-----------|-------------------------------------------------------------|
| P49961 | ENTPD1    | Ectonucleoside triphosphate diphosphohydrolase 1            |
| B3EWF7 | EPM2A     | Laforin, isoform 9                                          |
| O95278 | EPM2A     | Laforin                                                     |
| Q7L775 | EPM2AIP1  | EPM2A-interacting protein 1                                 |
| Q8IUD2 | ERC1      | ELKS/Rab6-interacting/CAST family member 1                  |
| Q5T890 | ERCC6L2   | DNA excision repair protein ERCC-6-like 2                   |
| H7BXQ9 | ERCC6L2   |                                                             |
| Q9NVM1 | EVA1B     | Protein eva-1 homolog B                                     |
| O43909 | EXTL3     | Exostosin-like 3                                            |
| Q8IYM0 | FAM186B   | Protein FAM186B                                             |
| Q9Y4E1 | FAM21C    | WASH complex subunit FAM21C                                 |
| Q9NUQ9 | FAM49B    | Protein FAM49B                                              |
| Q96K12 | FAR2      | Fatty acyl-CoA reductase 2                                  |
| Q9H469 | FBXL15    | F-box/LRR-repeat protein 15                                 |
| Q6PCT2 | FBXL19    | F-box/LRR-repeat protein 19                                 |
| Q86XK2 | FBXO11    | F-box only protein 11                                       |
| Q02790 | FKBP4     | Peptidyl-prolyl cis-trans isomerase FKBP4                   |
| Q01543 | FLI1      | Friend leukemia integration 1 transcription factor          |
| Q9UPI3 | FLVCR2    | Feline leukemia virus subgroup C receptor-related protein 2 |
| O95466 | FMNL1     | Formin-like protein 1                                       |
| Q92949 | FOXJ1     | Forkhead box protein J1                                     |
| Q8NA03 | FSIP1     | Fibrous sheath-interacting protein 1                        |
| Q8IY81 | FTSJ3     | pre-rRNA processing protein FTSJ3                           |
| O60353 | FZD6      | Frizzled-6                                                  |
| Q9H0R8 | GABARAPL1 | Gamma-aminobutyric acid receptor-associated protein-like 1  |
| Q8N428 | GALNT16   | Polypeptide N-acetylgalactosaminyltransferase 16            |
| P41250 | GARS      | Glycine--tRNA ligase                                        |
| Q75MN1 | GARS      |                                                             |
| Q8N6F7 | GCSAM     | Germinal center-associated signaling and motility protein   |
| Q7L5D6 | GET4      | Golgi to ER traffic protein 4 homolog                       |

|        |           |                                                                                               |
|--------|-----------|-----------------------------------------------------------------------------------------------|
| Q9H3K2 | GHITM     | Growth hormone-inducible transmembrane protein                                                |
| Q9UBU3 | GHRL      | Appetite-regulating hormone                                                                   |
| Q8NEA6 | GLIS3     | Zinc finger protein GLIS3                                                                     |
| P00505 | GOT2      | Aspartate aminotransferase, mitochondrial                                                     |
| P43250 | GRK6      | G protein-coupled receptor kinase 6                                                           |
| Q499G6 | GTF2I     |                                                                                               |
| P78347 | GTF2I     | General transcription factor II-I                                                             |
| Q9UHL9 | GTF2IRD1  | General transcription factor II-I repeat domain-containing protein 1                          |
| Q86UP8 | GTF2IRD2  | General transcription factor II-I repeat domain-containing protein 2A                         |
| Q6EKJ0 | GTF2IRD2B | General transcription factor II-I repeat domain-containing protein 2B                         |
| Q9UKN8 | GTF3C4    | General transcription factor 3C polypeptide 4                                                 |
| Q92522 | H1FX      | Histone H1x                                                                                   |
| O75367 | H2AFY     | Core histone macro-H2A.1                                                                      |
| Q9P0M6 | H2AFY2    | Core histone macro-H2A.2                                                                      |
| P0C0S5 | H2AFZ     | Histone H2A.Z                                                                                 |
| P12081 | HARS      | Histidine--tRNA ligase, cytoplasmic                                                           |
| P49590 | HARS2     | Probable histidine--tRNA ligase, mitochondrial                                                |
| Q96DB2 | HDAC11    | Histone deacetylase 11                                                                        |
| Q92769 | HDAC2     | Histone deacetylase 2                                                                         |
| Q86XA9 | HEATR5A   | HEAT repeat-containing protein 5A                                                             |
| Q9BSE4 | HERPUD2   | Homocysteine-responsive endoplasmic reticulum-resident ubiquitin-like domain member 2 protein |
| P06865 | HEXA      | Beta-hexosaminidase subunit alpha                                                             |
| Q9HCP6 | HHATL     | Protein-cysteine N-palmitoyltransferase HHAT-like protein                                     |
| Q14774 | HLX       | H2.0-like homeobox protein                                                                    |
| Q15989 | HLX1      |                                                                                               |
| B2RA10 | HOMER3    |                                                                                               |
| Q9NSC5 | HOMER3    | Homer protein homolog 3                                                                       |
| P14061 | HSD17B1   | Estradiol 17-beta-dehydrogenase 1                                                             |
| Q99714 | HSD17B10  | 3-hydroxyacyl-CoA dehydrogenase type-2                                                        |
| Q8NBQ5 | HSD17B11  | Estradiol 17-beta-dehydrogenase 11                                                            |

|        |          |                                                   |
|--------|----------|---------------------------------------------------|
| Q53GQ0 | HSD17B12 | Very-long-chain 3-oxoacyl-CoA reductase           |
| Q7Z5P4 | HSD17B13 | 17-beta-hydroxysteroid dehydrogenase 13           |
| Q9BPX1 | HSD17B14 | 17-beta-hydroxysteroid dehydrogenase 14           |
| P07900 | HSP90AA1 | Heat shock protein HSP 90-alpha                   |
| P14625 | HSP90B1  | Endoplasmic                                       |
| P08908 | HTR1A    | 5-hydroxytryptamine receptor 1A                   |
| P28222 | HTR1B    | 5-hydroxytryptamine receptor 1B                   |
| P28221 | HTR1D    | 5-hydroxytryptamine receptor 1D                   |
| P28566 | HTR1E    | 5-hydroxytryptamine receptor 1E                   |
| P30939 | HTR1F    | 5-hydroxytryptamine receptor 1F                   |
| P28223 | HTR2A    | 5-hydroxytryptamine receptor 2A                   |
| P41595 | HTR2B    | 5-hydroxytryptamine receptor 2B                   |
| P28335 | HTR2C    | 5-hydroxytryptamine receptor 2C                   |
| P46098 | HTR3A    | 5-hydroxytryptamine receptor 3A                   |
| O95264 | HTR3B    | 5-hydroxytryptamine receptor 3B                   |
| Q8WXA8 | HTR3C    | 5-hydroxytryptamine receptor 3C                   |
| Q70Z44 | HTR3D    | 5-hydroxytryptamine receptor 3D                   |
| A5X5Y0 | HTR3E    | 5-hydroxytryptamine receptor 3E                   |
| Q13639 | HTR4     | 5-hydroxytryptamine receptor 4                    |
| P50406 | HTR6     | 5-hydroxytryptamine receptor 6                    |
| P34969 | HTR7     | 5-hydroxytryptamine receptor 7                    |
| Q02363 | ID2      | DNA-binding protein inhibitor ID-2                |
| Q9HBE4 | IL21     | Interleukin-21                                    |
| Q9HBE5 | IL21R    | Interleukin-21 receptor                           |
| Q16891 | IMMT     | MICOS complex subunit MIC60                       |
| Q9UL03 | INTS6    | Integrator complex subunit 6                      |
| Q96P70 | IPO9     | Importin-9                                        |
| Q4KMZ1 | IQCC     | IQ domain-containing protein C                    |
| Q969R8 | ITFG2    | Integrin-alpha FG-GAP repeat-containing protein 2 |
| Q9NPI9 | KCNJ16   | Inward rectifier potassium channel 16             |



|            |          |                                                                                |
|------------|----------|--------------------------------------------------------------------------------|
| Q16558     | KCNMB1   | Calcium-activated potassium channel subunit beta-1                             |
| Q8WZ19     | KCTD13   | BTB/POZ domain-containing adapter for CUL3-mediated RhoA degradation protein 1 |
| Q4G0X4     | KCTD21   | BTB/POZ domain-containing protein KCTD21                                       |
| Q9BVV6     | KIAA0586 | Protein TALPID3                                                                |
| Q02241     | KIF23    | Kinesin-like protein KIF23                                                     |
| H7BYN4     | KIF23    | Kinesin-like protein                                                           |
| O95239     | KIF4A    | Chromosome-associated kinesin KIF4A                                            |
| Q6PJI1     | KIF9     |                                                                                |
| Q9HAQ2     | KIF9     | Kinesin-like protein KIF9                                                      |
| P57682     | KLF3     | Krueppel-like factor 3                                                         |
| Q9Y337     | KLK5     | Kallikrein-5                                                                   |
| Q92876     | KLK6     | Kallikrein-6                                                                   |
| Q8IZD2     | KMT2E    | Histone-lysine N-methyltransferase 2E                                          |
| P01042     | KNG1     | Kininogen-1                                                                    |
| Q1ED39     | KNOP1    | Lysine-rich nucleolar protein 1                                                |
| Q6ZNG9     | KRBA2    | KRAB-A domain-containing protein 2                                             |
| Q14CN4     | KRT72    | Keratin, type II cytoskeletal 72                                               |
| O43790     | KRT86    | Keratin, type II cuticular Hb6                                                 |
| Q86UP2     | KTN1     | Kinectin                                                                       |
| Q9BQD3     | KXD1     | KxDL motif-containing protein 1                                                |
| Q9H9P8     | L2HGDH   | L-2-hydroxyglutarate dehydrogenase, mitochondrial                              |
| O43504     | LAMTOR5  | Ragulator complex protein LAMTOR5                                              |
| A0A0C4DGV4 | LAMTOR5  |                                                                                |
| P52954     | LBX1     | Transcription factor LBX1                                                      |
| P42702     | LIFR     | Leukemia inhibitory factor receptor                                            |
| Q96GY3     | LIN37    | Protein lin-37 homolog                                                         |
| Q05469     | LIPE     | Hormone-sensitive lipase                                                       |
| Q9Y5X9     | LIPG     | Endothelial lipase                                                             |
| Q8TBB1     | LNX1     | E3 ubiquitin-protein ligase LNX                                                |
| Q92604     | LPGAT1   | Acyl-CoA:lysophosphatidylglycerol acyltransferase 1                            |

|        |          |                                                          |
|--------|----------|----------------------------------------------------------|
| Q93052 | LPP      | Lipoma-preferred partner                                 |
| Q86XM6 | LPPR4    |                                                          |
| Q5T3J3 | LRIF1    | Ligand-dependent nuclear receptor-interacting factor 1   |
| Q14114 | LRP8     | Low-density lipoprotein receptor-related protein 8       |
| P42704 | LRPPRC   | Leucine-rich PPR motif-containing protein, mitochondrial |
| Q8IUZ0 | LRRC49   | Leucine-rich repeat-containing protein 49                |
| Q96AG4 | LRRC59   | Leucine-rich repeat-containing protein 59                |
| Q6UXK5 | LRRN1    | Leucine-rich repeat neuronal protein 1                   |
| Q96E66 | LRTOMT   | Leucine-rich repeat-containing protein 51                |
| Q9UK45 | LSM7     | U6 snRNA-associated Sm-like protein LSM7                 |
| P36941 | LTBR     | Tumor necrosis factor receptor superfamily member 3      |
| Q13257 | MAD2L1   | Mitotic spindle assembly checkpoint protein MAD2A        |
| Q15013 | MAD2L1BP | MAD2L1-binding protein                                   |
| Q13164 | MAPK7    | Mitogen-activated protein kinase 7                       |
| Q8IW41 | MAPKAPK5 | MAP kinase-activated protein kinase 5                    |
| P10636 | MAPT     | Microtubule-associated protein tau                       |
| D6REM6 | MATR3    |                                                          |
| A8MXP9 | MATR3    |                                                          |
| P43243 | MATR3    | Matrin-3                                                 |
| P61244 | MAX      | Protein max                                              |
| C9JP00 | MBNL1    |                                                          |
| Q9NR56 | MBNL1    | Muscleblind-like protein 1                               |
| Q86VM6 | MBNL1    |                                                          |
| Q8NI22 | MCFD2    | Multiple coagulation factor deficiency protein 2         |
| Q8NEM0 | MCPH1    | Microcephalin                                            |
| Q06413 | MEF2C    | Myocyte-specific enhancer factor 2C                      |
| Q6UB28 | METAP1D  | Methionine aminopeptidase 1D, mitochondrial              |
| O95568 | METTL18  | Histidine protein methyltransferase 1 homolog            |
| P55082 | MFAP3    | Microfibril-associated glycoprotein 3                    |
| Q9GZY8 | MFF      | Mitochondrial fission factor                             |

|            |         |                                                  |
|------------|---------|--------------------------------------------------|
| P08493     | MGP     | Matrix Gla protein                               |
| Q9NXC5     | MIOS    | WD repeat-containing protein mio                 |
| Q9UL63     | MKLN1   | Muskelin                                         |
| P03956     | MMP1    | Interstitial collagenase                         |
| P09238     | MMP10   | Stromelysin-2                                    |
| P24347     | MMP11   | Stromelysin-3                                    |
| P39900     | MMP12   | Macrophage metalloelastase                       |
| P45452     | MMP13   | Collagenase 3                                    |
| P50281     | MMP14   | Matrix metalloproteinase-14                      |
| P51511     | MMP15   | Matrix metalloproteinase-15                      |
| P51512     | MMP16   | Matrix metalloproteinase-16                      |
| Q9ULZ9     | MMP17   | Matrix metalloproteinase-17                      |
| Q99542     | MMP19   | Matrix metalloproteinase-19                      |
| Q15014     | MORF4L2 | Mortality factor 4-like protein 2                |
| Q96LB2     | MRGPRX1 | Mas-related G-protein coupled receptor member X1 |
| K7ES61     | MRPL4   |                                                  |
| Q9BYD3     | MRPL4   | 39S ribosomal protein L4, mitochondrial          |
| Q9NQ50     | MRPL40  | 39S ribosomal protein L40, mitochondrial         |
| Q8IXM3     | MRPL41  | 39S ribosomal protein L41, mitochondrial         |
| Q9Y6G3     | MRPL42  | 39S ribosomal protein L42, mitochondrial         |
| J3KPP0     | MRPL42  |                                                  |
| B1AL05     | MRPL43  |                                                  |
| Q8N983     | MRPL43  | 39S ribosomal protein L43, mitochondrial         |
| Q9H9J2     | MRPL44  | 39S ribosomal protein L44, mitochondrial         |
| Q9BRJ2     | MRPL45  | 39S ribosomal protein L45, mitochondrial         |
| A0A087X2D5 | MRPL45  |                                                  |
| Q9H2W6     | MRPL46  | 39S ribosomal protein L46, mitochondrial         |
| Q9HD33     | MRPL47  | 39S ribosomal protein L47, mitochondrial         |
| Q96GC5     | MRPL48  | 39S ribosomal protein L48, mitochondrial         |
| Q13405     | MRPL49  | 39S ribosomal protein L49, mitochondrial         |

|        |         |                                                                 |
|--------|---------|-----------------------------------------------------------------|
| Q4U2R6 | MRPL51  | 39S ribosomal protein L51, mitochondrial                        |
| Q6P1R3 | MSANTD2 | Myb/SANT-like DNA-binding domain-containing protein 2           |
| P60660 | MYL6    | Myosin light polypeptide 6                                      |
| F8W1R7 | MYL6    |                                                                 |
| B7Z6Z4 | MYL6    |                                                                 |
| P14649 | MYL6B   | Myosin light chain 6B                                           |
| O94832 | MYO1D   | Unconventional myosin-Id                                        |
| Q8TDC0 | MYOZ3   | Myozenin-3                                                      |
| P54920 | NAPA    | Alpha-soluble NSF attachment protein                            |
| Q15021 | NCAPD2  | Condensin complex subunit 1                                     |
| O75376 | NCOR1   | Nuclear receptor corepressor 1                                  |
| Q9UN36 | NDRG2   | Protein NDRG2                                                   |
| P52848 | NDST1   | Bifunctional heparan sulfate N-deacetylase/N-sulfotransferase 1 |
| E7EVJ3 | NDST1   |                                                                 |
| P56556 | NDUFA6  | NADH dehydrogenase [ubiquinone] 1 alpha subcomplex subunit 6    |
| Q8N987 | NECAB1  | N-terminal EF-hand calcium-binding protein 1                    |
| Q13952 | NFYC    | Nuclear transcription factor Y subunit gamma                    |
| Q96IV0 | NGLY1   | Peptide-N(4)-(N-acetyl-beta-glucosaminyl)asparagine amidase     |
| Q9NZG7 | NINJ2   | Ninjurin-2                                                      |
| Q6P499 | NIPAL3  | NIPA-like protein 3                                             |
| Q0D2K0 | NIPAL4  | Magnesium transporter NIPA4                                     |
| P43699 | NKX2-1  | Homeobox protein Nkx-2.1                                        |
| O95096 | NKX2-2  | Homeobox protein Nkx-2.2                                        |
| Q8TAU0 | NKX2-3  | Homeobox protein Nkx-2.3                                        |
| Q9H2Z4 | NKX2-4  | Homeobox protein Nkx-2.4                                        |
| P52952 | NKX2-5  | Homeobox protein Nkx-2.5                                        |
| O15522 | NKX2-8  | Homeobox protein Nkx-2.8                                        |
| P30419 | NMT1    | Glycylpeptide N-tetradecanoyltransferase 1                      |
| Q7Z494 | NPHP3   | Nephrocystin-3                                                  |
| Q6PHZ7 | NR2C2   |                                                                 |

|        |         |                                                                                |
|--------|---------|--------------------------------------------------------------------------------|
| P49116 | NR2C2   | Nuclear receptor subfamily 2 group C member 2                                  |
| Q86WQ0 | NR2C2AP | Nuclear receptor 2C2-associated protein                                        |
| Q9BXI3 | NT5C1A  | Cytosolic 5'-nucleotidase 1A                                                   |
| Q96P26 | NT5C1B  | Cytosolic 5'-nucleotidase 1B                                                   |
| P49902 | NT5C2   | Cytosolic purine 5'-nucleotidase                                               |
| Q9H0P0 | NT5C3A  | Cytosolic 5'-nucleotidase 3A                                                   |
| Q969T7 | NT5C3B  | 7-methylguanosine phosphate-specific 5'-nucleotidase                           |
| P21589 | NT5E    | 5'-nucleotidase                                                                |
| P36639 | NUDT1   | 7,8-dihydro-8-oxoguanine triphosphatase                                        |
| Q9BRQ3 | NUDT22  | Nucleoside diphosphate-linked moiety X motif 22                                |
| Q9BZD4 | NUF2    | Kinetochore protein Nuf2                                                       |
| P57740 | NUP107  | Nuclear pore complex protein Nup107                                            |
| P61970 | NUTF2   | Nuclear transport factor 2                                                     |
| O43929 | ORC4    | Origin recognition complex subunit 4                                           |
| Q7L3T8 | PARS2   | Probable proline--tRNA ligase, mitochondrial                                   |
| O00408 | PDE2A   | cGMP-dependent 3',5'-cyclic phosphodiesterase                                  |
| Q08499 | PDE4D   | cAMP-specific 3',5'-cyclic phosphodiesterase 4D                                |
| Q8TBR0 | PDE4DIP |                                                                                |
| E9PL24 | PDE4DIP |                                                                                |
| Q5TB27 | PDE4DIP |                                                                                |
| Q5VU43 | PDE4DIP | Myomegalin                                                                     |
| H7BZJ3 | PDIA3   |                                                                                |
| P30101 | PDIA3   | Protein disulfide-isomerase A3                                                 |
| Q8N165 | PDIK1L  | Serine/threonine-protein kinase PDIK1L                                         |
| Q15118 | PDK1    | [Pyruvate dehydrogenase (acetyl-transferring)] kinase isozyme 1, mitochondrial |
| Q7Z412 | PEX26   | Peroxisome assembly protein 26                                                 |
| Q8IYB4 | PEX5L   | PEX5-related protein                                                           |
| Q96QT6 | PHF12   | PHD finger protein 12                                                          |
| Q7Z7B1 | PIGW    | Phosphatidylinositol-glycan biosynthesis class W protein                       |
| P48739 | PITPNB  | Phosphatidylinositol transfer protein beta isoform                             |

|        |          |                                                                        |
|--------|----------|------------------------------------------------------------------------|
| Q9NZM6 | PKD2L2   | Polycystic kidney disease 2-like 2 protein                             |
| Q8N3E9 | PLCD3    | 1-phosphatidylinositol 4,5-bisphosphate phosphodiesterase delta-3      |
| O60568 | PLOD3    | Procollagen-lysine,2-oxoglutarate 5-dioxygenase 3                      |
| Q9NUX5 | POT1     | Protection of telomeres protein 1                                      |
| P16298 | PPP3CB   | Serine/threonine-protein phosphatase 2B catalytic subunit beta isoform |
| Q7Z3G6 | PRICKLE2 | Prickle-like protein 2                                                 |
| Q9Y478 | PRKAB1   | 5'-AMP-activated protein kinase subunit beta-1                         |
| P54619 | PRKAG1   | 5'-AMP-activated protein kinase subunit gamma-1                        |
| O43172 | PRPF4    | U4/U6 small nuclear ribonucleoprotein Prp4                             |
| O75400 | PRPF40A  | Pre-mRNA-processing factor 40 homolog A                                |
| H7C2N3 | PRPF40A  |                                                                        |
| Q6NWX9 | PRPF40B  | Pre-mRNA-processing factor 40 homolog B                                |
| Q13523 | PRPF4B   | Serine/threonine-protein kinase PRP4 homolog                           |
| P41219 | PRPH     | Peripherin                                                             |
| P23942 | PRPH2    | Peripherin-2                                                           |
| O60256 | PRPSAP2  | Phosphoribosyl pyrophosphate synthase-associated protein 2             |
| D3DWI6 | PSCA     |                                                                        |
| A5PKW4 | PSD      | PH and SEC7 domain-containing protein 1                                |
| Q9BQI7 | PSD2     | PH and SEC7 domain-containing protein 2                                |
| Q9NYI0 | PSD3     | PH and SEC7 domain-containing protein 3                                |
| Q8NDX1 | PSD4     | PH and SEC7 domain-containing protein 4                                |
| Q5JNW7 | PSMB8    |                                                                        |
| P28062 | PSMB8    | Proteasome subunit beta type-8                                         |
| O75832 | PSMD10   | 26S proteasome non-ATPase regulatory subunit 10                        |
| O00231 | PSMD11   | 26S proteasome non-ATPase regulatory subunit 11                        |
| O00232 | PSMD12   | 26S proteasome non-ATPase regulatory subunit 12                        |
| Q9UNM6 | PSMD13   | 26S proteasome non-ATPase regulatory subunit 13                        |
| O00487 | PSMD14   | 26S proteasome non-ATPase regulatory subunit 14                        |
| Q9BT73 | PSMG3    | Proteasome assembly chaperone 3                                        |
| Q86Y79 | PTRH1    | Probable peptidyl-tRNA hydrolase                                       |

|        |           |                                             |
|--------|-----------|---------------------------------------------|
| Q7L804 | RAB11FIP2 | Rab11 family-interacting protein 2          |
| Q9H082 | RAB33B    | Ras-related protein Rab-33B                 |
| Q9H0N0 | RAB6C     | Ras-related protein Rab-6C                  |
| O60895 | RAMP2     | Receptor activity-modifying protein 2       |
| P10276 | RARA      | Retinoic acid receptor alpha                |
| Q9UJF2 | RASAL2    | Ras GTPase-activating protein nGAP          |
| Q96T37 | RBM15     | Putative RNA-binding protein 15             |
| Q8NDT2 | RBM15B    | Putative RNA-binding protein 15B            |
| Q9Y5S9 | RBM8A     | RNA-binding protein 8A                      |
| Q6JBY9 | RCSD1     | CapZ-interacting protein                    |
| O60673 | REV3L     | DNA polymerase zeta catalytic subunit       |
| O75677 | RFPL1     | Ret finger protein-like 1                   |
| Q33E94 | RFX4      | Transcription factor RFX4                   |
| Q8IZJ4 | RGL4      | Ral-GDS-related protein                     |
| E7EPT8 | RGL4      |                                             |
| Q9HBH0 | RHOF      | Rho-related GTP-binding protein RhoF        |
| Q8TAA1 | RNASE11   | Probable ribonuclease 11                    |
| O60930 | RNASEH1   | Ribonuclease H1                             |
| Q5XPI4 | RNF123    | E3 ubiquitin-protein ligase RNF123          |
| Q8TC41 | RNF217    | Probable E3 ubiquitin-protein ligase RNF217 |
| Q96EP0 | RNF31     | E3 ubiquitin-protein ligase RNF31           |
| Q68DV7 | RNF43     | E3 ubiquitin-protein ligase RNF43           |
| P35244 | RPA3      | Replication protein A 14 kDa subunit        |
| Q9UNX3 | RPL26L1   | 60S ribosomal protein L26-like 1            |
| Q8TBK5 | RPL6      | 60S ribosomal protein L6                    |
| Q02878 | RPL6      | 60S ribosomal protein L6                    |
| Q5JR95 | RPS8      |                                             |
| Q5JR94 | RPS8      | 40S ribosomal protein S8                    |
| P62241 | RPS8      | 40S ribosomal protein S8                    |
| Q8WYR4 | RSPH1     | Radial spoke head 1 homolog                 |

|        |           |                                                          |
|--------|-----------|----------------------------------------------------------|
| B2RC85 | RSPH10B2  | Radial spoke head 10 homolog B2                          |
| Q9UHP6 | RSPH14    | Radial spoke head 14 homolog                             |
| Q9BVN2 | RUSC1     | RUN and SH3 domain-containing protein 1                  |
| Q66K80 | RUSC1-AS1 | Putative uncharacterized protein RUSC1-AS1               |
| P23297 | S100A1    | Protein S100-A1                                          |
| P60903 | S100A10   | Protein S100-A10                                         |
| P31949 | S100A11   | Protein S100-A11                                         |
| P80511 | S100A12   | Protein S100-A12                                         |
| Q99584 | S100A13   | Protein S100-A13                                         |
| Q9HCY8 | S100A14   | Protein S100-A14                                         |
| Q96FQ6 | S100A16   | Protein S100-A16                                         |
| Q9UPW6 | SATB2     | DNA-binding protein SATB2                                |
| P05408 | SCG5      | Neuroendocrine protein 7B2                               |
| Q6UWF3 | SCIMP     | SLP adapter and CSK-interacting membrane protein         |
| O95487 | SEC24B    | Protein transport protein Sec24B                         |
| Q9UGP8 | SEC63     | Translocation protein SEC63 homolog                      |
| Q9H2E6 | SEMA6A    | Semaphorin-6A                                            |
| Q9H4I8 | SERHL2    | Serine hydrolase-like protein 2                          |
| P58005 | SESN3     | Sestrin-3                                                |
| Q8NHU3 | SGMS2     | Phosphatidylcholine:ceramide cholinephosphotransferase 2 |
| Q9H2X9 | SLC12A5   | Solute carrier family 12 member 5                        |
| P53985 | SLC16A1   | Monocarboxylate transporter 1                            |
| Q8TF71 | SLC16A10  | Monocarboxylate transporter 10                           |
| Q8NCK7 | SLC16A11  | Monocarboxylate transporter 11                           |
| Q7RTY0 | SLC16A13  | Monocarboxylate transporter 13                           |
| Q7RTX9 | SLC16A14  | Monocarboxylate transporter 14                           |
| Q9P2U8 | SLC17A6   | Vesicular glutamate transporter 2                        |
| Q05940 | SLC18A2   | Synaptic vesicular amine transporter                     |
| P43004 | SLC1A2    | Excitatory amino acid transporter 2                      |
| Q08357 | SLC20A2   | Sodium-dependent phosphate transporter 2                 |



|        |          |                                                                                                     |
|--------|----------|-----------------------------------------------------------------------------------------------------|
| O76082 | SLC22A5  | Solute carrier family 22 member 5                                                                   |
| H7BZF0 | SLC22A5  |                                                                                                     |
| Q6NUK1 | SLC25A24 | Calcium-binding mitochondrial carrier protein SCaMC-1                                               |
| Q96NT5 | SLC46A1  | Proton-coupled folate transporter                                                                   |
| Q9NZC9 | SMARCAL1 | SWI/SNF-related matrix-associated actin-dependent regulator of chromatin subfamily A-like protein 1 |
| P53814 | SMTN     | Smoothelin                                                                                          |
| Q2TAL5 | SMTNL2   | Smoothelin-like protein 2                                                                           |
| Q3KNW1 | SNAI3    | Zinc finger protein SNAI3                                                                           |
| P37840 | SNCA     | Alpha-synuclein                                                                                     |
| Q9Y6H5 | SNCAIP   | Synphilin-1                                                                                         |
| Q13342 | SP140    | Nuclear body protein SP140                                                                          |
| Q9H930 | SP140L   | Nuclear body protein SP140-like protein                                                             |
| Q96R06 | SPAG5    | Sperm-associated antigen 5                                                                          |
| P09486 | SPARC    | SPARC                                                                                               |
| Q8N4S1 | SPARCL1  |                                                                                                     |
| Q14515 | SPARCL1  | SPARC-like protein 1                                                                                |
| Q12772 | SREBF2   | Sterol regulatory element-binding protein 2                                                         |
| I3L182 | SRRM2    |                                                                                                     |
| Q9UQ35 | SRRM2    | Serine/arginine repetitive matrix protein 2                                                         |
| Q567R6 | SSBP1    | Single-stranded DNA-binding protein                                                                 |
| Q04837 | SSBP1    | Single-stranded DNA-binding protein, mitochondrial                                                  |
| P51571 | SSR4     | Translocon-associated protein subunit delta                                                         |
| P31391 | SSTR4    | Somatostatin receptor type 4                                                                        |
| Q9NRC1 | ST7      | Suppressor of tumorigenicity 7 protein                                                              |
| Q8TDW4 | ST7L     | Suppressor of tumorigenicity 7 protein-like                                                         |
| P49675 | STAR     | Steroidogenic acute regulatory protein, mitochondrial                                               |
| Q9Y365 | STARD10  | PCTP-like protein                                                                                   |
| Q9Y3M8 | STARD13  | StAR-related lipid transfer protein 13                                                              |
| Q14849 | STARD3   | StAR-related lipid transfer protein 3                                                               |
| O95772 | STARD3NL | MLN64 N-terminal domain homolog                                                                     |

|        |         |                                                                                            |
|--------|---------|--------------------------------------------------------------------------------------------|
| Q9NQZ5 | STARD7  | StAR-related lipid transfer protein 7, mitochondrial                                       |
| Q92502 | STARD8  | StAR-related lipid transfer protein 8                                                      |
| Q9P2P6 | STARD9  | StAR-related lipid transfer protein 9                                                      |
| Q658P3 | STEAP3  | Metalloreductase STEAP3                                                                    |
| Q9BX79 | STRA6   | Stimulated by retinoic acid gene 6 protein homolog                                         |
| D6RF48 | STX18   |                                                                                            |
| Q9P2W9 | STX18   | Syntaxin-18                                                                                |
| Q5T5C0 | STXBP5  | Syntaxin-binding protein 5                                                                 |
| Q9Y2K9 | STXBP5L | Syntaxin-binding protein 5-like                                                            |
| P63272 | SUPT4H1 | Transcription elongation factor SPT4                                                       |
| Q7KZ85 | SUPT6H  | Transcription elongation factor SPT6                                                       |
| Q15527 | SURF2   | Surfeit locus protein 2                                                                    |
| O43463 | SUV39H1 | Histone-lysine N-methyltransferase SUV39H1                                                 |
| Q9H987 | SYNPO2L | Synaptopodin 2-like protein                                                                |
| P08247 | SYP     | Synaptophysin                                                                              |
| Q16563 | SYPL1   | Synaptophysin-like protein 1                                                               |
| Q5VXT5 | SYPL2   | Synaptophysin-like protein 2                                                               |
| Q9Y6J9 | TAF6L   | TAF6-like RNA polymerase II p300/CBP-associated factor-associated factor 65 kDa subunit 6L |
| Q96QE5 | TEFM    | Transcription elongation factor, mitochondrial                                             |
| Q6UWH6 | TEX261  | Protein TEX261                                                                             |
| Q9BT49 | THAP7   | THAP domain-containing protein 7                                                           |
| Q9H5L6 | THAP9   | DNA transposase THAP9                                                                      |
| P49746 | THBS3   | Thrombospondin-3                                                                           |
| Q9BV44 | THUMPD3 | THUMP domain-containing protein 3                                                          |
| P31314 | TLX1    | T-cell leukemia homeobox protein 1                                                         |
| P30408 | TM4SF1  | Transmembrane 4 L6 family member 1                                                         |
| Q6FGK0 | TM4SF13 |                                                                                            |
| Q96CE8 | TM4SF18 | Transmembrane 4 L6 family member 18                                                        |
| Q96DZ7 | TM4SF19 | Transmembrane 4 L6 family member 19                                                        |
| Q6UXY8 | TMC5    | Transmembrane channel-like protein 5                                                       |

|        |          |                                                      |
|--------|----------|------------------------------------------------------|
| Q15363 | TMED2    | Transmembrane emp24 domain-containing protein 2      |
| P17152 | TMEM11   | Transmembrane protein 11, mitochondrial              |
| Q12893 | TMEM115  | Transmembrane protein 115                            |
| Q9NPIO | TMEM138  | Transmembrane protein 138                            |
| Q9BVK8 | TMEM147  | Transmembrane protein 147                            |
| Q9P2C4 | TMEM181  | Transmembrane protein 181                            |
| Q6ZP80 | TMEM182  | Transmembrane protein 182                            |
| Q8IXX5 | TMEM183A | Transmembrane protein 183A                           |
| Q6ZMB5 | TMEM184A | Transmembrane protein 184A                           |
| Q9Y519 | TMEM184B | Transmembrane protein 184B                           |
| Q9NVA4 | TMEM184C | Transmembrane protein 184C                           |
| Q8NFB2 | TMEM185A | Transmembrane protein 185A                           |
| Q9H7F4 | TMEM185B | Transmembrane protein 185B                           |
| Q96B77 | TMEM186  | Transmembrane protein 186                            |
| A5PLL7 | TMEM189  | Transmembrane protein 189                            |
| Q6QAJ8 | TMEM220  | Transmembrane protein 220                            |
| Q86YD3 | TMEM25   | Transmembrane protein 25                             |
| Q8N6L7 | TMEM252  | Transmembrane protein 252                            |
| POC7T8 | TMEM253  | Transmembrane protein 253                            |
| Q5JRV8 | TMEM255A | Transmembrane protein 255A                           |
| Q8WV15 | TMEM255B | Transmembrane protein 255B                           |
| Q8N2U0 | TMEM256  | Transmembrane protein 256                            |
| P61165 | TMEM258  | Transmembrane protein 258                            |
| Q4ZIN3 | TMEM259  | Membralin                                            |
| Q3MIR4 | TMEM30B  | Cell cycle control protein 50B                       |
| A6NDV4 | TMEM8B   | Transmembrane protein 8B                             |
| P21580 | TNFAIP3  | Tumor necrosis factor alpha-induced protein 3        |
| Q92956 | TNFRSF14 | Tumor necrosis factor receptor superfamily member 14 |
| C9J1X3 | TNK2     |                                                      |
| Q07912 | TNK2     | Activated CDC42 kinase 1                             |

|        |          |                                                    |
|--------|----------|----------------------------------------------------|
| O95271 | TNKS     | Tankyrase-1                                        |
| E7EQ52 | TNKS     | Poly [ADP-ribose] polymerase                       |
| Q9C0C2 | TNKS1BP1 | 182 kDa tankyrase-1-binding protein                |
| Q9H2K2 | TNKS2    | Tankyrase-2                                        |
| Q92973 | TNPO1    | Transportin-1                                      |
| Q6ZTW0 | TPGS1    | Tubulin polyglutamylase complex subunit 1          |
| B7Z722 | TPM1     |                                                    |
| H0YK48 | TPM1     |                                                    |
| H7BYY1 | TPM1     |                                                    |
| P09493 | TPM1     | Tropomyosin alpha-1 chain                          |
| O14773 | TPP1     | Tripeptidyl-peptidase 1                            |
| Q5T0D9 | TPRG1L   | Tumor protein p63-regulated gene 1-like protein    |
| O43734 | TRAF3IP2 | Adapter protein CIKS                               |
| Q9UKU6 | TRHDE    | Thyrotropin-releasing hormone-degrading ectoenzyme |
| Q9HCM9 | TRIM39   | E3 ubiquitin-protein ligase TRIM39                 |
| A6ZJ12 | TRIM39R  |                                                    |
| Q9C029 | TRIM7    | Tripartite motif-containing protein 7              |
| Q2Q1W2 | TRIM71   | E3 ubiquitin-protein ligase TRIM71                 |
| Q6ZMU5 | TRIM72   | Tripartite motif-containing protein 72             |
| Q86UV7 | TRIM73   | Tripartite motif-containing protein 73             |
| Q86UV6 | TRIM74   | Tripartite motif-containing protein 74             |
| Q6PF05 | TTC23L   | Tetratricopeptide repeat protein 23-like           |
| A6NLP5 | TTC36    | Tetratricopeptide repeat protein 36                |
| Q5SRH9 | TTC39A   | Tetratricopeptide repeat protein 39A               |
| Q6ZVT0 | TLL10    | Inactive polyglycylase TLL10                       |
| P17480 | UBTF     | Nucleolar transcription factor 1                   |
| Q5T124 | UBXN11   | UBX domain-containing protein 11                   |
| Q9BZV1 | UBXN6    | UBX domain-containing protein 6                    |
| P09936 | UCHL1    | Ubiquitin carboxyl-terminal hydrolase isozyme L1   |
| Q9BZX2 | UCK2     | Uridine-cytidine kinase 2                          |

|        |           |                                                                |
|--------|-----------|----------------------------------------------------------------|
| O95185 | UNC5C     | Netrin receptor UNC5C                                          |
| Q8IV45 | UNC5CL    | UNC5C-like protein                                             |
| Q9UBR1 | UPB1      | Beta-ureidopropionase                                          |
| P47985 | UQCRFS1   | Cytochrome b-c1 complex subunit Rieske, mitochondrial          |
| POC7P4 | UQCRFS1P1 | Putative cytochrome b-c1 complex subunit Rieske-like protein 1 |
| Q70CQ3 | USP30     | Ubiquitin carboxyl-terminal hydrolase 30                       |
| Q70EL1 | USP54     | Inactive ubiquitin carboxyl-terminal hydrolase 54              |
| Q92738 | USP6NL    | USP6 N-terminal-like protein                                   |
| Q9P2Y5 | UVRAG     | UV radiation resistance-associated gene protein                |
| E9PR71 | UVRAG     |                                                                |
| P08670 | VIM       | Vimentin                                                       |
| Q9BQE4 | VIMP      | Selenoprotein S                                                |
| P32241 | VIPR1     | Vasoactive intestinal polypeptide receptor 1                   |
| P98155 | VLDLR     | Very low-density lipoprotein receptor                          |
| P23381 | WARS      | Tryptophan--tRNA ligase, cytoplasmic                           |
| Q9UGM6 | WARS2     | Tryptophan--tRNA ligase, mitochondrial                         |
| Q9BZH6 | WDR11     | WD repeat-containing protein 11                                |
| P19544 | WT1       | Wilms tumor protein                                            |
| P18887 | XRCC1     | DNA repair protein XRCC1                                       |
| P61236 | YPEL3     | Protein yippee-like 3                                          |
| Q96IU2 | ZBED3     | Zinc finger BED domain-containing protein 3                    |
| Q9ULJ3 | ZBTB21    | Zinc finger and BTB domain-containing protein 21               |
| O75362 | ZNF217    | Zinc finger protein 217                                        |
| P17026 | ZNF22     | Zinc finger protein 22                                         |
| Q9UK13 | ZNF221    | Zinc finger protein 221                                        |
| Q9UK11 | ZNF223    | Zinc finger protein 223                                        |
| Q9HCA8 | ZNF224    |                                                                |
| Q9NZL3 | ZNF224    | Zinc finger protein 224                                        |
| Q9UK10 | ZNF225    | Zinc finger protein 225                                        |
| Q9NYT6 | ZNF226    | Zinc finger protein 226                                        |

|        |         |                                                   |
|--------|---------|---------------------------------------------------|
| Q86WZ6 | ZNF227  | Zinc finger protein 227                           |
| Q9UNY5 | ZNF232  | Zinc finger protein 232                           |
| Q96KM6 | ZNF512B | Zinc finger protein 512B                          |
| Q9Y2D9 | ZNF652  | Zinc finger protein 652                           |
| Q8N1G0 | ZNF687  | Zinc finger protein 687                           |
| Q96N20 | ZNF75A  | Zinc finger protein 75A                           |
| Q6ZN11 | ZNF793  | Zinc finger protein 793                           |
| Q9P1U0 | ZNRD1   | DNA-directed RNA polymerase I subunit RPA12       |
| Q9BUG6 | ZSCAN5A | Zinc finger and SCAN domain-containing protein 5A |
