# Supplementary material
Source: PubMed Central journal article supplement (PMC7610982)
Supplement: EMS126982-supplement-Supplementary_Table5.pdf [file EMS126982-supplement-Supplementary_Table5.pdf]

## CDS overlapping genes

| <b>Uniprot ID</b> | <b>Gene Name</b> | <b>Description</b>                                                         |
|-------------------|------------------|----------------------------------------------------------------------------|
| P04217            | A1BG             | Alpha-1B-glycoprotein                                                      |
| Q8IU7             | ABCA9            | ATP-binding cassette sub-family A member 9                                 |
| O94929            | ABLIM3           | Actin-binding LIM protein 3                                                |
| Q8TDX5            | ACMSD            | 2-amino-3-carboxymuconate-6-semialdehyde decarboxylase                     |
| Q8NCV1            | ADAD2            | Adenosine deaminase domain-containing protein 2                            |
| P82987            | ADAMTSL3         | ADAMTS-like protein 3                                                      |
| Q6UY14            | ADAMTSL4         | ADAMTS-like protein 4                                                      |
| P07327            | ADH1A            | Alcohol dehydrogenase 1A                                                   |
| Q8N556            | AFAP1            | Actin filament-associated protein 1                                        |
| Q8TED9            | AFAP1L1          | Actin filament-associated protein 1-like 1                                 |
| Q8N4X5            | AFAP1L2          | Actin filament-associated protein 1-like 2                                 |
| Q6P6C2            | ALKBH5           | RNA demethylase ALKBH5                                                     |
| Q9Y2G4            | ANKRD6           | Ankyrin repeat domain-containing protein 6                                 |
| E5RJM6            | ANKRD65          | Ankyrin repeat domain-containing protein 65                                |
| P41181            | AQP2             | Aquaporin-2                                                                |
| B7ZMI2            | ARAP1            |                                                                            |
| Q96P48            | ARAP1            | Arf-GAP with Rho-GAP domain, ANK repeat and PH domain-containing protein 1 |
| Q9P2N2            | ARHGAP28         | Rho GTPase-activating protein 28                                           |
| D3DTR7            | ARHGEF15         |                                                                            |
| O94989            | ARHGEF15         | Rho guanine nucleotide exchange factor 15                                  |
| Q9HBZ2            | ARNT2            | Aryl hydrocarbon receptor nuclear translocator 2                           |
| Q93070            | ART4             | Ecto-ADP-ribosyltransferase 4                                              |
| Q96NS5            | ASB16            | Ankyrin repeat and SOCS box protein 16                                     |
| Q495Z4            | ASB16-AS1        | Putative uncharacterized protein ASB16-AS1                                 |
| Q6DD88            | ATL3             | Atlastin-3                                                                 |
| Q9NQ11            | ATP13A2          | Probable cation-transporting ATPase 13A2                                   |
| O75947            | ATP5H            | ATP synthase subunit d, mitochondrial                                      |
| O75815            | BCAR3            | Breast cancer anti-estrogen resistance protein 3                           |

|        |          |                                                              |
|--------|----------|--------------------------------------------------------------|
| Q8WUZ0 | BCL7C    | B-cell CLL/lymphoma 7 protein family member C                |
| P23560 | BDNF     | Brain-derived neurotrophic factor                            |
| Q9BUH8 | BEGAIN   | Brain-enriched guanylate kinase-associated protein           |
| Q8WV28 | BLNK     | B-cell linker protein                                        |
| Q7Z5Y6 | BMP8A    | Bone morphogenetic protein 8A                                |
| P17213 | BPI      | Bactericidal permeability-increasing protein                 |
| Q9NP55 | BPIFA1   | BPI fold-containing family A member 1                        |
| Q96DR5 | BPIFA2   | BPI fold-containing family A member 2                        |
| Q8TDL5 | BPIFB1   | BPI fold-containing family B member 1                        |
| Q8N4F0 | BPIFB2   | BPI fold-containing family B member 2                        |
| P59826 | BPIFB3   | BPI fold-containing family B member 3                        |
| Q9NPI1 | BRD7     | Bromodomain-containing protein 7                             |
| O95153 | BZRAP1   | Peripheral-type benzodiazepine receptor-associated protein 1 |
| A6NNL5 | C15orf61 | Uncharacterized protein C15orf61                             |
| Q86XI8 | C19orf68 | Uncharacterized protein C19orf68                             |
| Q9BXI9 | C1QTNF6  | Complement C1q tumor necrosis factor-related protein 6       |
| Q9NZP8 | C1RL     | Complement C1r subcomponent-like protein                     |
| O43822 | C21orf2  | Protein C21orf2                                              |
| Q6ZVT6 | C3orf67  | Uncharacterized protein C3orf67                              |
| Q13936 | CACNA1C  | Voltage-dependent L-type calcium channel subunit alpha-1C    |
| Q8IZS8 | CACNA2D3 | Voltage-dependent calcium channel subunit alpha-2/delta-3    |
| Q8WUQ7 | CACTIN   | Cactin                                                       |
| Q9BXL6 | CARD14   | Caspase recruitment domain-containing protein 14             |
| O75081 | CBFA2T3  | Protein CBFA2T3                                              |
| Q8IYE1 | CCDC13   | Coiled-coil domain-containing protein 13                     |
| P13994 | CCDC130  | Coiled-coil domain-containing protein 130                    |
| Q9H6E4 | CCDC134  | Coiled-coil domain-containing protein 134                    |
| Q96JN2 | CCDC136  | Coiled-coil domain-containing protein 136                    |
| Q6PK04 | CCDC137  | Coiled-coil domain-containing protein 137                    |
| Q96M89 | CCDC138  | Coiled-coil domain-containing protein 138                    |

|        |          |                                                           |
|--------|----------|-----------------------------------------------------------|
| Q8NFR7 | CCDC148  | Coiled-coil domain-containing protein 148                 |
| Q569K6 | CCDC157  | Coiled-coil domain-containing protein 157                 |
| Q9H6F5 | CCDC86   | Coiled-coil domain-containing protein 86                  |
| Q3V6T2 | CCDC88A  | Girdin                                                    |
| Q567U6 | CCDC93   | Coiled-coil domain-containing protein 93                  |
| P41002 | CCNF     | Cyclin-F                                                  |
| P27701 | CD82     | CD82 antigen                                              |
| Q15517 | CDSN     | Corneodesmosin                                            |
| P13688 | CEACAM1  | Carcinoembryonic antigen-related cell adhesion molecule 1 |
| Q03701 | CEBPZ    | CCAAT/enhancer-binding protein zeta                       |
| Q0VF96 | CGNL1    | Cingulin-like protein 1                                   |
| P11229 | CHRM1    | Muscarinic acetylcholine receptor M1                      |
| O43405 | COCH     | Cochlin                                                   |
| Q07092 | COL16A1  | Collagen alpha-1(XVI) chain                               |
| Q01955 | COL4A3   | Collagen alpha-3(IV) chain                                |
| Q9Y5P4 | COL4A3BP | Collagen type IV alpha-3-binding protein                  |
| P43155 | CRAT     | Carnitine O-acetyltransferase                             |
| Q8IUI8 | CRLF3    | Cytokine receptor-like factor 3                           |
| P26232 | CTNNA2   | Catenin alpha-2                                           |
| Q8IWT3 | CUL9     | Cullin-9                                                  |
| Q69YN2 | CWF19L1  | CWF19-like protein 1                                      |
| Q86T65 | DAAM2    | Disheveled-associated activator of morphogenesis 2        |
| Q6DCB0 | DAAM2    |                                                           |
| P59103 | DAOA     | D-amino acid oxidase activator                            |
| Q9UIK4 | DAPK2    | Death-associated protein kinase 2                         |
| Q96GQ7 | DDX27    | Probable ATP-dependent RNA helicase DDX27                 |
| B4E1G1 | DERL1    | Derlin                                                    |
| Q9BUN8 | DERL1    | Derlin-1                                                  |
| O43323 | DHH      | Desert hedgehog protein                                   |
| Q6P158 | DHX57    | Putative ATP-dependent RNA helicase DHX57                 |

|        |           |                                                         |
|--------|-----------|---------------------------------------------------------|
| Q8N4U2 | DHX57     |                                                         |
| Q9P1A6 | DLGAP2    | Disks large-associated protein 2                        |
| P59910 | DNAJB13   | DnaJ homolog subfamily B member 13                      |
| Q7L591 | DOK3      | Docking protein 3                                       |
| P27487 | DPP4      | Dipeptidyl peptidase 4                                  |
| Q86T12 | DPP9      | Dipeptidyl peptidase 9                                  |
| Q08554 | DSC1      | Desmocollin-1                                           |
| Q8TF09 | DYNLRB2   | Dynein light chain roadblock-type 2                     |
| Q96JC9 | EAF1      | ELL-associated factor 1                                 |
| O75071 | EFCAB14   | EF-hand calcium-binding domain-containing protein 14    |
| Q9NRA8 | EIF4ENIF1 | Eukaryotic translation initiation factor 4E transporter |
| P08246 | ELANE     | Neutrophil elastase                                     |
| P15502 | ELN       | Elastin                                                 |
| Q32P44 | EML3      | Echinoderm microtubule-associated protein-like 3        |
| Q8NFI3 | ENGASE    | Cytosolic endo-beta-N-acetylglucosaminidase             |
| Q07075 | ENPEP     | Glutamyl aminopeptidase                                 |
| P49961 | ENTPD1    | Ectonucleoside triphosphate diphosphohydrolase 1        |
| O75355 | ENTPD3    | Ectonucleoside triphosphate diphosphohydrolase 3        |
| Q09472 | EP300     | Histone acetyltransferase p300                          |
| Q9H201 | EPN3      | Epsin-3                                                 |
| Q96PL5 | ERMAP     | Erythroid membrane-associated protein                   |
| Q9NVF9 | ETNK2     | Ethanolamine kinase 2                                   |
| Q9NVM1 | EVA1B     | Protein eva-1 homolog B                                 |
| E9PLN6 | EYA4      | Eyes absent homolog                                     |
| O95677 | EYA4      | Eyes absent homolog 4                                   |
| Q8IYM0 | FAM186B   | Protein FAM186B                                         |
| Q9BXW9 | FANCD2    | Fanconi anemia group D2 protein                         |
| Q8N3Y1 | FBXW8     | F-box/WD repeat-containing protein 8                    |
| P14324 | FDPS      | Farnesyl pyrophosphate synthase                         |
| Q6ZNL6 | FGD5      | FYVE, RhoGEF and PH domain-containing protein 5         |

|        |           |                                                                                |
|--------|-----------|--------------------------------------------------------------------------------|
| P11362 | FGFR1     | Fibroblast growth factor receptor 1                                            |
| O95684 | FGFR1OP   | FGFR1 oncogene partner                                                         |
| Q9NVK5 | FGFR1OP2  | FGFR1 oncogene partner 2                                                       |
| Q08830 | FGL1      | Fibrinogen-like protein 1                                                      |
| Q5D862 | FLG2      | Filaggrin-2                                                                    |
| O95466 | FMNL1     | Formin-like protein 1                                                          |
| P54710 | FXVD2     | Sodium/potassium-transporting ATPase subunit gamma                             |
| O14556 | GAPDHS    | Glyceraldehyde-3-phosphate dehydrogenase, testis-specific                      |
| Q8IWI2 | GCC2      | GRIP and coiled-coil domain-containing protein 2                               |
| Q14409 | GK3P      | Putative glycerol kinase 3                                                     |
| Q5VSY0 | GKAP1     | G kinase-anchoring protein 1                                                   |
| Q9NS71 | GKN1      | Gastroke-1                                                                     |
| Q86XP6 | GKN2      | Gastroke-2                                                                     |
| P30679 | GNA15     | Guanine nucleotide-binding protein subunit alpha-15                            |
| O14775 | GNB5      | Guanine nucleotide-binding protein subunit beta-5                              |
| P30968 | GNRHR     | Gonadotropin-releasing hormone receptor                                        |
| Q8TAA5 | GRPEL2    | GrpE protein homolog 2, mitochondrial                                          |
| Q499G6 | GTF2I     |                                                                                |
| P78347 | GTF2I     | General transcription factor II-I                                              |
| Q9UHL9 | GTF2IRD1  | General transcription factor II-I repeat domain-containing protein 1           |
| Q86UP8 | GTF2IRD2  | General transcription factor II-I repeat domain-containing protein 2A          |
| Q6EKJ0 | GTF2IRD2B | General transcription factor II-I repeat domain-containing protein 2B          |
| Q8WUA4 | GTF3C2    | General transcription factor 3C polypeptide 2                                  |
| P54840 | GYS2      | Glycogen [starch] synthase, liver                                              |
| P49863 | GZMK      | Granzyme K                                                                     |
| Q92522 | H1FX      | Histone H1x                                                                    |
| P61296 | HAND2     | Heart- and neural crest derivatives-expressed protein 2                        |
| Q9UL51 | HCN2      | Potassium/sodium hyperpolarization-activated cyclic nucleotide-gated channel 2 |
| O43613 | HCRTR1    | Orexin receptor type 1                                                         |
| Q76N89 | HECW1     | E3 ubiquitin-protein ligase HECW1                                              |

|        |          |                                                                          |
|--------|----------|--------------------------------------------------------------------------|
| Q14CZ8 | HEPACAM  | Hepatocyte cell adhesion molecule                                        |
| A8MVV5 | HEPACAM2 | HEPACAM family member 2                                                  |
| P37059 | HSD17B2  | Estradiol 17-beta-dehydrogenase 2                                        |
| P05362 | ICAM1    | Intercellular adhesion molecule 1                                        |
| Q86VF2 | IGFN1    | Immunoglobulin-like and fibronectin type III domain-containing protein 1 |
| Q8N9C0 | IGSF22   | Immunoglobulin superfamily member 22                                     |
| Q9H5V7 | IKZF5    | Zinc finger protein Pegasus                                              |
| P29459 | IL12A    | Interleukin-12 subunit alpha                                             |
| Q14005 | IL16     | Pro-interleukin-16                                                       |
| H0YKB7 | IL16     |                                                                          |
| Q8IUU6 | IL16     |                                                                          |
| Q9NRM6 | IL17RB   | Interleukin-17 receptor B                                                |
| P01589 | IL2RA    | Interleukin-2 receptor subunit alpha                                     |
| Q4KMZ1 | IQCC     | IQ domain-containing protein C                                           |
| Q86VS3 | IQCH     | IQ domain-containing protein H                                           |
| Q8TB96 | ITFG1    | T-cell immunomodulatory protein                                          |
| P08648 | ITGA5    | Integrin alpha-5                                                         |
| P20701 | ITGAL    | Integrin alpha-L                                                         |
| Q96ST2 | IWS1     | Protein IWS1 homolog                                                     |
| Q7L2V5 | IWS1     |                                                                          |
| P78504 | JAG1     | Protein jagged-1                                                         |
| A0AUZ9 | KANSL1L  | KAT8 regulatory NSL complex subunit 1-like protein                       |
| Q9H427 | KCNK15   | Potassium channel subfamily K member 15                                  |
| Q12791 | KCNMA1   | Calcium-activated potassium channel subunit alpha-1                      |
| P51787 | KCNQ1    | Potassium voltage-gated channel subfamily KQT member 1                   |
| Q4G0X4 | KCTD21   | BTB/POZ domain-containing protein KCTD21                                 |
| Q8N371 | KDM8     | Lysine-specific demethylase 8                                            |
| Q08E86 | KIAA0100 |                                                                          |
| Q14667 | KIAA0100 | Protein KIAA0100                                                         |
| O60303 | KIAA0556 | Protein KIAA0556                                                         |

|        |         |                                                                          |
|--------|---------|--------------------------------------------------------------------------|
| O43896 | KIF1C   | Kinesin-like protein KIF1C                                               |
| Q99661 | KIF2C   | Kinesin-like protein KIF2C                                               |
| Q6PJI1 | KIF9    |                                                                          |
| Q9HAQ2 | KIF9    | Kinesin-like protein KIF9                                                |
| Q03164 | KMT2A   | Histone-lysine N-methyltransferase 2A                                    |
| P01042 | KNG1    | Kininogen-1                                                              |
| O76014 | KRT37   | Keratin, type I cuticular Ha7                                            |
| P08729 | KRT7    | Keratin, type II cytoskeletal 7                                          |
| Q3SY84 | KRT71   | Keratin, type II cytoskeletal 71                                         |
| Q14CN4 | KRT72   | Keratin, type II cytoskeletal 72                                         |
| Q86Y46 | KRT73   | Keratin, type II cytoskeletal 73                                         |
| Q7RTS7 | KRT74   | Keratin, type II cytoskeletal 74                                         |
| O95678 | KRT75   | Keratin, type II cytoskeletal 75                                         |
| Q01546 | KRT76   | Keratin, type II cytoskeletal 2 oral                                     |
| Q0IIN1 | KRT77   |                                                                          |
| Q7Z794 | KRT77   | Keratin, type II cytoskeletal 1b                                         |
| Q8N1N4 | KRT78   | Keratin, type II cytoskeletal 78                                         |
| Q5XKE5 | KRT79   | Keratin, type II cytoskeletal 79                                         |
| Q9NSB2 | KRT84   | Keratin, type II cuticular Hb4                                           |
| Q969R5 | L3MBTL2 | Lethal(3)malignant brain tumor-like protein 2                            |
| Q969G2 | LHX4    | LIM/homeobox protein Lhx4                                                |
| Q05469 | LIPE    | Hormone-sensitive lipase                                                 |
| Q9Y5X9 | LIPG    | Endothelial lipase                                                       |
| Q8IVB5 | LIX1L   | LIX1-like protein                                                        |
| Q08397 | LOXL1   | Lysyl oxidase homolog 1                                                  |
| Q6PJG9 | LRFN4   | Leucine-rich repeat and fibronectin type-III domain-containing protein 4 |
| O75096 | LRP4    | Low-density lipoprotein receptor-related protein 4                       |
| Q14392 | LRRC32  | Leucine-rich repeat-containing protein 32                                |
| Q38SD2 | LRRK1   | Leucine-rich repeat serine/threonine-protein kinase 1                    |
| Q7Z4T9 | MAATS1  | Protein MAATS1                                                           |

|        |        |                                                          |
|--------|--------|----------------------------------------------------------|
| Q7Z304 | MAMDC2 | MAM domain-containing protein 2                          |
| P11137 | MAP2   | Microtubule-associated protein 2                         |
| Q92918 | MAP4K1 | Mitogen-activated protein kinase kinase kinase kinase 1  |
| Q49MG5 | MAP9   | Microtubule-associated protein 9                         |
| O60307 | MAST3  | Microtubule-associated serine/threonine-protein kinase 3 |
| P21941 | MATN1  | Cartilage matrix protein                                 |
| O60318 | MCM3AP | Germinal-center associated nuclear protein               |
| Q5EB52 | MEST   | Mesoderm-specific transcript homolog protein             |
| Q9BRT3 | MIEN1  | Migration and invasion enhancer 1                        |
| Q9BUB5 | MKNK1  | MAP kinase-interacting serine/threonine-protein kinase 1 |
| Q6P2C6 | MLLT6  |                                                          |
| P55198 | MLLT6  | Protein AF-17                                            |
| P03956 | MMP1   | Interstitial collagenase                                 |
| P09238 | MMP10  | Stromelysin-2                                            |
| P24347 | MMP11  | Stromelysin-3                                            |
| P39900 | MMP12  | Macrophage metalloelastase                               |
| P45452 | MMP13  | Collagenase 3                                            |
| P50281 | MMP14  | Matrix metalloproteinase-14                              |
| P51511 | MMP15  | Matrix metalloproteinase-15                              |
| P51512 | MMP16  | Matrix metalloproteinase-16                              |
| Q9ULZ9 | MMP17  | Matrix metalloproteinase-17                              |
| Q99542 | MMP19  | Matrix metalloproteinase-19                              |
| Q9NPA2 | MMP25  | Matrix metalloproteinase-25                              |
| P08254 | MMP3   | Stromelysin-1                                            |
| P14780 | MMP9   | Matrix metalloproteinase-9                               |
| Q8N594 | MPND   | MPN domain-containing protein                            |
| W4VSR2 | MPND   |                                                          |
| Q9Y6F6 | MRVI1  | Protein MRVI1                                            |
| Q13126 | MTAP   | S-methyl-5'-thioadenosine phosphorylase                  |
| Q9Y216 | MTMR7  | Myotubularin-related protein 7                           |



|           |        |                                                      |
|-----------|--------|------------------------------------------------------|
| Q96QG7    | MTMR9  | Myotubularin-related protein 9                       |
| Q9UKN1    | MUC12  | Mucin-12                                             |
| Q9H3Q6    | MUC3A  |                                                      |
| Q02505    | MUC3A  | Mucin-3A                                             |
| O75592    | MYCBP2 | E3 ubiquitin-protein ligase MYCBP2                   |
| P35749    | MYH11  | Myosin-11                                            |
| Q15746    | MYLK   | Myosin light chain kinase, smooth muscle             |
| Q9H1R3    | MYLK2  | Myosin light chain kinase 2, skeletal/cardiac muscle |
| Q32MK0    | MYLK3  | Myosin light chain kinase 3                          |
| Q86YV6    | MYLK4  | Myosin light chain kinase family member 4            |
| Q9NPC7    | MYNN   | Myoneurin                                            |
| Q8IUJ5    | MYO18B | Unconventional myosin-XVIIIb                         |
| Q9NQX4    | MYO5C  | Unconventional myosin-Vc                             |
| Q5VTT5    | MYOM3  | Myomesin-3                                           |
| Q9UBF9    | MYOT   | Myotilin                                             |
| A0A0C4DFM | MYOT   |                                                      |
| Q8IZF0    | NALCN  | Sodium leak channel non-selective protein            |
| P54920    | NAPA   | Alpha-soluble NSF attachment protein                 |
| Q96I59    | NARS2  | Probable asparagine--tRNA ligase, mitochondrial      |
| Q8NEY1    | NAV1   | Neuron navigator 1                                   |
| Q15080    | NCF4   | Neutrophil cytosol factor 4                          |
| Q5SYE7    | NHSL1  | NHS-like protein 1                                   |
| H0YDF6    | NHSL1  |                                                      |
| P78316    | NOP14  | Nucleolar protein 14                                 |
| P53384    | NUBP1  | Cytosolic Fe-S cluster assembly factor NUBP1         |
| Q02818    | NUCB1  | Nucleobindin-1                                       |
| Q9UNL7    | NUMA1  |                                                      |
| Q14980    | NUMA1  | Nuclear mitotic apparatus protein 1                  |
| P35658    | NUP214 | Nuclear pore complex protein Nup214                  |
| P00973    | OAS1   | 2'-5'-oligoadenylate synthase 1                      |

|        |         |                                                               |
|--------|---------|---------------------------------------------------------------|
| Q9NXX6 | PAQR5   | Membrane progesterin receptor gamma                           |
| G3V167 | PARP2   | Poly [ADP-ribose] polymerase                                  |
| Q9UGN5 | PARP2   | Poly [ADP-ribose] polymerase 2                                |
| Q06710 | PAX8    | Paired box protein Pax-8                                      |
| Q15365 | PCBP1   | Poly(rC)-binding protein 1                                    |
| Q53SS8 | PCBP1   |                                                               |
| O94913 | PCF11   | Pre-mRNA cleavage complex 2 protein Pcf11                     |
| Q6P996 | PDXDC1  | Pyridoxal-dependent decarboxylase domain-containing protein 1 |
| Q86XE2 | PDXDC1  |                                                               |
| Q9UBV8 | PEF1    | Peflin                                                        |
| Q8N2H9 | PELI3   | E3 ubiquitin-protein ligase pellino homolog 3                 |
| O43933 | PEX1    | Peroxisome biogenesis factor 1                                |
| D6RA89 | PEX10   |                                                               |
| O60683 | PEX10   | Peroxisome biogenesis factor 10                               |
| O75192 | PEX11A  | Peroxisomal membrane protein 11A                              |
| O96011 | PEX11B  | Peroxisomal membrane protein 11B                              |
| Q96HA9 | PEX11G  | Peroxisomal membrane protein 11C                              |
| A0PJ54 | PEX12   |                                                               |
| O00623 | PEX12   | Peroxisome assembly protein 12                                |
| Q92968 | PEX13   | Peroxisomal membrane protein PEX13                            |
| O75381 | PEX14   | Peroxisomal membrane protein PEX14                            |
| Q9Y5Y5 | PEX16   | Peroxisomal membrane protein PEX16                            |
| Q5QNY5 | PEX19   |                                                               |
| P40855 | PEX19   | Peroxisomal biogenesis factor 19                              |
| Q8IXK0 | PHC2    | Polyhomeotic-like protein 2                                   |
| A8MW92 | PHF20L1 | PHD finger protein 20-like protein 1                          |
| F8W9L8 | PHF20L1 |                                                               |
| Q92508 | PIEZO1  | Piezo-type mechanosensitive ion channel component 1           |
| Q99569 | PKP4    | Plakophilin-4                                                 |
| Q9UP65 | PLA2G4C | Cytosolic phospholipase A2 gamma                              |

|         |         |                                                                                   |
|---------|---------|-----------------------------------------------------------------------------------|
| Q3MJ16  | PLA2G4E | Cytosolic phospholipase A2 epsilon                                                |
| P19174  | PLCG1   | 1-phosphatidylinositol 4,5-bisphosphate phosphodiesterase gamma-1                 |
| Q8IUUK5 | PLXDC1  | Plexin domain-containing protein 1                                                |
| Q6S545  | POTEH   | POTE ankyrin domain family member H                                               |
| Q13136  | PPFIA1  | Liprin-alpha-1                                                                    |
| O75334  | PPFIA2  | Liprin-alpha-2                                                                    |
| Q9Y570  | PPME1   | Protein phosphatase methylesterase 1                                              |
| P30153  | PPP2R1A | Serine/threonine-protein phosphatase 2A 65 kDa regulatory subunit A alpha isoform |
| A8K7B7  | PPP2R1A |                                                                                   |
| C9J9C1  | PPP2R1A |                                                                                   |
| O75569  | PRKRA   | Interferon-inducible double-stranded RNA-dependent protein kinase activator A     |
| O14744  | PRMT5   | Protein arginine N-methyltransferase 5                                            |
| F1T0A5  | PRPF31  |                                                                                   |
| Q8WWY3  | PRPF31  | U4/U6 small nuclear ribonucleoprotein Prp31                                       |
| P41219  | PRPH    | Peripherin                                                                        |
| P23942  | PRPH2   | Peripherin-2                                                                      |
| Q5FWE3  | PRRT3   | Proline-rich transmembrane protein 3                                              |
| Q86YD1  | PTOV1   | Prostate tumor-overexpressed gene 1 protein                                       |
| P23467  | PTPRB   | Receptor-type tyrosine-protein phosphatase beta                                   |
| Q15262  | PTPRK   | Receptor-type tyrosine-protein phosphatase kappa                                  |
| Q16849  | PTPRN   | Receptor-type tyrosine-protein phosphatase-like N                                 |
| Q92932  | PTPRN2  | Receptor-type tyrosine-protein phosphatase N2                                     |
| Q6FIG4  | RAB1B   |                                                                                   |
| Q92927  | rab1b   |                                                                                   |
| Q9H0U4  | RAB1B   | Ras-related protein Rab-1B                                                        |
| Q9H0N0  | RAB6C   | Ras-related protein Rab-6C                                                        |
| P61006  | RAB8A   | Ras-related protein Rab-8A                                                        |
| Q92698  | RAD54L  | DNA repair and recombination protein RAD54-like                                   |
| H0Y760  | RAD54L2 |                                                                                   |
| Q9Y4B4  | RAD54L2 | Helicase ARIP4                                                                    |

|        |           |                                                          |
|--------|-----------|----------------------------------------------------------|
| Q684P5 | RAP1GAP2  | Rap1 GTPase-activating protein 2                         |
| Q9Y3L5 | RAP2C     | Ras-related protein Rap-2c                               |
| O95398 | RAPGEF3   | Rap guanine nucleotide exchange factor 3                 |
| O14827 | RASGRF2   | Ras-specific guanine nucleotide-releasing factor 2       |
| O95267 | RASGRP1   | RAS guanyl-releasing protein 1                           |
| Q9Y5S9 | RBM8A     | RNA-binding protein 8A                                   |
| O75628 | REM1      | GTP-binding protein REM 1                                |
| O75677 | RFPL1     | Ret finger protein-like 1                                |
| Q8IZJ4 | RGL4      | Ral-GDS-related protein                                  |
| E7EPT8 | RGL4      |                                                          |
| O00237 | RNF103    | E3 ubiquitin-protein ligase RNF103                       |
| Q96PX1 | RNF157    | RING finger protein 157                                  |
| Q5W0B1 | RNF219    | RING finger protein 219                                  |
| Q9H4A4 | RNPEP     | Aminopeptidase B                                         |
| Q9HAU8 | RNPEPL1   | Arginyl aminopeptidase-like 1                            |
| Q59EK9 | RUNDC3A   | RUN domain-containing protein 3A                         |
| Q9BVN2 | RUSC1     | RUN and SH3 domain-containing protein 1                  |
| Q66K80 | RUSC1-AS1 | Putative uncharacterized protein RUSC1-AS1               |
| Q9UPW6 | SATB2     | DNA-binding protein SATB2                                |
| Q86WG5 | SBF2      | Myotubularin-related protein 13                          |
| O95171 | SCEL      | Sciellin                                                 |
| Q6UWF3 | SCIMP     | SLP adapter and CSK-interacting membrane protein         |
| P35498 | SCN1A     | Sodium channel protein type 1 subunit alpha              |
| O95810 | SDPR      | Serum deprivation-response protein                       |
| Q9UDX3 | SEC14L4   | SEC14-like protein 4                                     |
| Q9BVL4 | SELO      | Selenoprotein O                                          |
| Q9H2E6 | SEMA6A    | Semaphorin-6A                                            |
| P35247 | SFTPD     | Pulmonary surfactant-associated protein D                |
| Q96LW2 | SGK494    | Uncharacterized serine/threonine-protein kinase SgK494   |
| Q86VZ5 | SGMS1     | Phosphatidylcholine:ceramide cholinephosphotransferase 1 |

|        |          |                                                                                               |
|--------|----------|-----------------------------------------------------------------------------------------------|
| Q8NHU3 | SGMS2    | Phosphatidylcholine:ceramide cholinephosphotransferase 2                                      |
| Q9Y3L3 | SH3BP1   | SH3 domain-binding protein 1                                                                  |
| P60896 | SHFM1    | 26S proteasome complex subunit DSS1                                                           |
| O15374 | SLC16A4  | Monocarboxylate transporter 5                                                                 |
| O15403 | SLC16A6  | Monocarboxylate transporter 7                                                                 |
| Q15758 | SLC1A5   | Neutral amino acid transporter B(0)                                                           |
| O00341 | SLC1A7   | Excitatory amino acid transporter 5                                                           |
| Q9H015 | SLC22A4  | Solute carrier family 22 member 4                                                             |
| Q96NT5 | SLC46A1  | Proton-coupled folate transporter                                                             |
| Q8TBB6 | SLC7A14  | Probable cationic amino acid transporter                                                      |
| O75094 | SLIT3    | Slit homolog 3 protein                                                                        |
| Q9NWH9 | SLTM     | SAFB-like transcription modulator                                                             |
| Q6STE5 | SMARCD3  | SWI/SNF-related matrix-associated actin-dependent regulator of chromatin subfamily D member 3 |
| Q92485 | SMPDL3B  | Acid sphingomyelinase-like phosphodiesterase 3b                                               |
| F8VWW8 | SMPDL3B  |                                                                                               |
| Q9HCE7 | SMURF1   | E3 ubiquitin-protein ligase SMURF1                                                            |
| Q8WW59 | SPRYD4   | SPRY domain-containing protein 4                                                              |
| P78539 | SRPX     | Sushi repeat-containing protein SRPX                                                          |
| O60687 | SRPX2    | Sushi repeat-containing protein SRPX2                                                         |
| Q9NRC1 | ST7      | Suppressor of tumorigenicity 7 protein                                                        |
| Q8TDW4 | ST7L     | Suppressor of tumorigenicity 7 protein-like                                                   |
| Q9UJ98 | STAG3    | Cohesin subunit SA-3                                                                          |
| Q7L1H2 | STAG3L1  |                                                                                               |
| POCL83 | STAG3L1  | Putative STAG3-like protein 1                                                                 |
| Q92783 | STAM     | Signal transducing adapter molecule 1                                                         |
| O75886 | STAM2    | Signal transducing adapter molecule 2                                                         |
| O95630 | STAMBP   | STAM-binding protein                                                                          |
| Q96FJ0 | STAMBPL1 | AMSH-like protease                                                                            |
| Q687X5 | STEAP4   | Metalloreductase STEAP4                                                                       |
| Q8IWU5 | SULF2    | Extracellular sulfatase Sulf-2                                                                |

|        |          |                                                       |
|--------|----------|-------------------------------------------------------|
| P63272 | SUPT4H1  | Transcription elongation factor SPT4                  |
| Q92797 | SYMPK    | Symplekin                                             |
| O15061 | SYNM     | Synemin                                               |
| Q86UU9 | TAC4     | Tachykinin-4                                          |
| Q8IZX4 | TAF1L    | Transcription initiation factor TFIID subunit 1-like  |
| Q13207 | TBX2     | T-box transcription factor TBX2                       |
| Q9UMR3 | TBX20    | T-box transcription factor TBX20                      |
| Q9UL17 | TBX21    | T-box transcription factor TBX21                      |
| Q9Y458 | TBX22    | T-box transcription factor TBX22                      |
| P56279 | TCL1A    | T-cell leukemia/lymphoma protein 1A                   |
| Q6UWH6 | TEX261   | Protein TEX261                                        |
| P10600 | TGFB3    | Transforming growth factor beta-3                     |
| P49746 | THBS3    | Thrombospondin-3                                      |
| P35443 | THBS4    | Thrombospondin-4                                      |
| Q9UPZ6 | THSD7A   | Thrombospondin type-1 domain-containing protein 7A    |
| Q8IVF5 | TIAM2    | T-lymphoma invasion and metastasis-inducing protein 2 |
| Q9Y4G6 | TLN2     | Talin-2                                               |
| Q96DZ7 | TM4SF19  | Transmembrane 4 L6 family member 19                   |
| Q14C87 | TMEM132D | Transmembrane protein 132D                            |
| Q8IV31 | TMEM139  | Transmembrane protein 139                             |
| Q6P2H8 | TMEM53   | Transmembrane protein 53                              |
| Q969K7 | TMEM54   | Transmembrane protein 54                              |
| Q8NBN3 | TMEM87A  | Transmembrane protein 87A                             |
| P11387 | TOP1     | DNA topoisomerase 1                                   |
| Q969P6 | TOP1MT   | DNA topoisomerase I, mitochondrial                    |
| Q2L6J1 | TRIM31   |                                                       |
| Q9BZY9 | TRIM31   | E3 ubiquitin-protein ligase TRIM31                    |
| Q9C029 | TRIM7    | Tripartite motif-containing protein 7                 |
| Q2Q1W2 | TRIM71   | E3 ubiquitin-protein ligase TRIM71                    |
| Q6ZMU5 | TRIM72   | Tripartite motif-containing protein 72                |

|        |        |                                                                  |
|--------|--------|------------------------------------------------------------------|
| Q86UV7 | TRIM73 | Tripartite motif-containing protein 73                           |
| Q86UV6 | TRIM74 | Tripartite motif-containing protein 74                           |
| Q7Z2W7 | TRPM8  | Transient receptor potential cation channel subfamily M member 8 |
| Q9H1D0 | TRPV6  | Transient receptor potential cation channel subfamily V member 6 |
| Q96AY4 | TTC28  | Tetratricopeptide repeat protein 28                              |
| A6NLP5 | TTC36  | Tetratricopeptide repeat protein 36                              |
| Q9Y6I4 | USP3   | Ubiquitin carboxyl-terminal hydrolase 3                          |
| Q70CQ3 | USP30  | Ubiquitin carboxyl-terminal hydrolase 30                         |
| Q70CQ4 | USP31  | Ubiquitin carboxyl-terminal hydrolase 31                         |
| Q4VC15 | USP32  |                                                                  |
| Q8NFA0 | USP32  | Ubiquitin carboxyl-terminal hydrolase 32                         |
| Q8TEY7 | USP33  | Ubiquitin carboxyl-terminal hydrolase 33                         |
| Q70CQ2 | USP34  | Ubiquitin carboxyl-terminal hydrolase 34                         |
| Q9P2H5 | USP35  | Ubiquitin carboxyl-terminal hydrolase 35                         |
| E9PK78 | USP35  |                                                                  |
| Q9P275 | USP36  | Ubiquitin carboxyl-terminal hydrolase 36                         |
| Q86T82 | USP37  | Ubiquitin carboxyl-terminal hydrolase 37                         |
| Q8NB14 | USP38  | Ubiquitin carboxyl-terminal hydrolase 38                         |
| Q53GS9 | USP39  | U4/U6.U5 tri-snRNP-associated protein 2                          |
| Q70EL1 | USP54  | Inactive ubiquitin carboxyl-terminal hydrolase 54                |
| P40818 | USP8   | Ubiquitin carboxyl-terminal hydrolase 8                          |
| Q9Y2C2 | UST    | Uronyl 2-sulfotransferase                                        |
| Q08AM6 | VAC14  | Protein VAC14 homolog                                            |
| P32241 | VIPR1  | Vasoactive intestinal polypeptide receptor 1                     |
| P98155 | VLDLR  | Very low-density lipoprotein receptor                            |
| P23381 | WARS   | Tryptophan--tRNA ligase, cytoplasmic                             |
| Q9UGM6 | WARS2  | Tryptophan--tRNA ligase, mitochondrial                           |
| Q6RFH5 | WDR74  | WD repeat-containing protein 74                                  |
| Q5T9L3 | WLS    | Protein wntless homolog                                          |
| Q14191 | WRN    | Werner syndrome ATP-dependent helicase                           |

|        |         |                                                     |
|--------|---------|-----------------------------------------------------|
| Q96S55 | WRNIP1  | ATPase WRNIP1                                       |
| Q9H6D3 | XKR8    | XK-related protein 8                                |
| Q01831 | XPC     | DNA repair protein complementing XP-C cells         |
| P18887 | XRCC1   | DNA repair protein XRCC1                            |
| Q9ULM3 | YEATS2  | YEATS domain-containing protein 2                   |
| Q8N5H6 | YEATS2  |                                                     |
| Q9NYL2 | ZAK     | Mitogen-activated protein kinase kinase kinase MLT  |
| Q9P243 | ZFAT    | Zinc finger protein ZFAT                            |
| O95405 | ZFYVE9  | Zinc finger FYVE domain-containing protein 9        |
| Q9NZV7 | ZIM2    | Zinc finger imprinted 2                             |
| Q9P0L1 | ZKSCAN7 | Zinc finger protein with KRAB and SCAN domains 7    |
| O95201 | ZNF205  | Zinc finger protein 205                             |
| Q9P2E3 | ZNFX1   | NFX1-type zinc finger-containing protein 1          |
| Q05996 | ZP2     | Zona pellucida sperm-binding protein 2              |
| Q12836 | ZP4     | Zona pellucida sperm-binding protein 4              |
| O95218 | ZRANB2  | Zinc finger Ran-binding domain-containing protein 2 |
| Q6WRX3 | ZYG11A  | Protein zyg-11 homolog A                            |
