# Supplementary material
Source: PubMed Central journal article supplement (PMC7610982)
Supplement: EMS126982-supplement-Supplementary_Table6.pdf [file EMS126982-supplement-Supplementary_Table6.pdf]

## 3'-UTR overlapping genes

| <b>Uniprot ID</b> | <b>Gene Name</b> | <b>Description</b>                                             |
|-------------------|------------------|----------------------------------------------------------------|
| P80404            | ABAT             | 4-aminobutyrate aminotransferase, mitochondrial                |
| O14734            | ACOT8            | Acyl-coenzyme A thioesterase 8                                 |
| Q5FVE4            | ACSBG2           | Long-chain-fatty-acid--CoA ligase ACSBG2                       |
| Q6NUN0            | ACSM5            | Acyl-coenzyme A synthetase ACSM5, mitochondrial                |
| P68032            | ACTC1            | Actin, alpha cardiac muscle 1                                  |
| Q8NCV1            | ADAD2            | Adenosine deaminase domain-containing protein 2                |
| P78536            | ADAM17           | Disintegrin and metalloproteinase domain-containing protein 17 |
| P28332            | ADH6             | Alcohol dehydrogenase 6                                        |
| Q8IUN7            | ADH6             |                                                                |
| Q15848            | ADIPOQ           | Adiponectin                                                    |
| A8K660            | ADIPOQ           |                                                                |
| P29274            | ADORA2A          | Adenosine receptor A2a                                         |
| Q12802            | AKAP13           | A-kinase anchor protein 13                                     |
| O75891            | ALDH1L1          | Cytosolic 10-formyltetrahydrofolate dehydrogenase              |
| O15123            | ANGPT2           | Angiopoietin-2                                                 |
| P16157            | ANK1             | Ankyrin-1                                                      |
| O75843            | AP1G2            | AP-1 complex subunit gamma-like 2                              |
| P41181            | AQP2             | Aquaporin-2                                                    |
| P84085            | ARF5             | ADP-ribosylation factor 5                                      |
| Q8NHE4            | ATP6V0E2         | V-type proton ATPase subunit e 2                               |
| Q3B7T3            | BEAN1            | Protein BEAN1                                                  |
| Q6ZUT1            | C11orf57         | Uncharacterized protein C11orf57                               |
| Q6ZRI6            | C15orf39         | Uncharacterized protein C15orf39                               |
| Q5T0L3            | C1orf111         | Uncharacterized protein C1orf111                               |
| Q9NSG2            | C1orf112         | Uncharacterized protein C1orf112                               |
| Q9H7X2            | C1orf115         | Uncharacterized protein C1orf115                               |
| Q5JU67            | C9orf117         | Uncharacterized protein C9orf117                               |
| O75493            | CA11             | Carbonic anhydrase-related protein 11                          |

|        |         |                                                                   |
|--------|---------|-------------------------------------------------------------------|
| Q13936 | CACNA1C | Voltage-dependent L-type calcium channel subunit alpha-1C         |
| Q8WUQ7 | CACTIN  | Cactin                                                            |
| P27482 | CALML3  | Calmodulin-like protein 3                                         |
| Q13555 | CAMK2G  | Calcium/calmodulin-dependent protein kinase type II subunit gamma |
| Q9BXL6 | CARD14  | Caspase recruitment domain-containing protein 14                  |
| Q9Y2V2 | CARHSP1 | Calcium-regulated heat-stable protein 1                           |
| Q8IW40 | CCDC103 | Coiled-coil domain-containing protein 103                         |
| Q5T9S5 | CCDC18  | Coiled-coil domain-containing protein 18                          |
| Q9P1Z9 | CCDC180 | Coiled-coil domain-containing protein 180                         |
| Q5TID7 | CCDC181 | Coiled-coil domain-containing protein 181                         |
| Q5T5S1 | CCDC183 | Coiled-coil domain-containing protein 183                         |
| Q52MB2 | CCDC184 | Coiled-coil domain-containing protein 184                         |
| Q8N715 | CCDC185 | Coiled-coil domain-containing protein 185                         |
| Q7Z3E2 | CCDC186 | Coiled-coil domain-containing protein 186                         |
| A1A4V9 | CCDC189 | Coiled-coil domain-containing protein 189                         |
| Q9BUN5 | CCDC28B | Coiled-coil domain-containing protein 28B                         |
| P24385 | CCND1   | G1/S-specific cyclin-D1                                           |
| P41002 | CCNF    | Cyclin-F                                                          |
| P48643 | CCT5    | T-complex protein 1 subunit epsilon                               |
| P25942 | CD40    | Tumor necrosis factor receptor superfamily member 5               |
| P09326 | CD48    | CD48 antigen                                                      |
| Q4KMG0 | CDON    | Cell adhesion molecule-related/down-regulated by oncogenes        |
| Q15517 | CDSN    | Corneodesmosin                                                    |
| P13688 | CEACAM1 | Carcinoembryonic antigen-related cell adhesion molecule 1         |
| Q6IPU0 | CENPP   | Centromere protein P                                              |
| Q7Z7K6 | CENPV   | Centromere protein V                                              |
| P52757 | CHN2    | Beta-chimaerin                                                    |
| Q9P2E5 | CHPF2   | Chondroitin sulfate glucuronyltransferase                         |
| G5E9W2 | CHPF2   |                                                                   |
| P11229 | CHRM1   | Muscarinic acetylcholine receptor M1                              |

|        |           |                                                      |
|--------|-----------|------------------------------------------------------|
| P17787 | CHRN2     | Neuronal acetylcholine receptor subunit beta-2       |
| Q96AJ1 | CLUAP1    | Clusterin-associated protein 1                       |
| Q8NE01 | CNNM3     | Metal transporter CNNM3                              |
| O75128 | COBL      | Protein cordon-bleu                                  |
| Q53SF7 | COBLL1    | Cordon-bleu protein-like 1                           |
| O43405 | COCH      | Cochlin                                              |
| Q8N668 | COMM1     | COMM domain-containing protein 1                     |
| Q9Y6G5 | COMM10    | COMM domain-containing protein 10                    |
| Q8WZ74 | CTTNBP2   | Cortactin-binding protein 2                          |
| Q9P2B4 | CTTNBP2NL | CTTNBP2 N-terminal-like protein                      |
| Q8WWM9 | CYGB      | Cytoglobin                                           |
| Q9Y4D2 | DAGLA     | Sn1-specific diacylglycerol lipase alpha             |
| Q6UX07 | DHRS13    | Dehydrogenase/reductase SDR family member 13         |
| P59910 | DNAJB13   | DnaJ homolog subfamily B member 13                   |
| O14645 | DNALI1    | Axonemal dynein light intermediate polypeptide 1     |
| Q8IYX4 | DND1      | Dead end protein homolog 1                           |
| Q3MIW9 | DPCR1     | Diffuse panbronchiolitis critical region protein 1   |
| Q96JC9 | EAF1      | ELL-associated factor 1                              |
| Q9HAV5 | EDA2R     | Tumor necrosis factor receptor superfamily member 27 |
| Q96F86 | EDC3      | Enhancer of mRNA-decapping protein 3                 |
| Q5R3F8 | ELFN2     | Protein phosphatase 1 regulatory subunit 29          |
| Q9P0I2 | EMC3      | ER membrane protein complex subunit 3                |
| P49961 | ENTPD1    | Ectonucleoside triphosphate diphosphohydrolase 1     |
| Q96PL5 | ERMAP     | Erythroid membrane-associated protein                |
| Q01780 | EXOSC10   | Exosome component 10                                 |
| Q6NZ36 | FAAP20    | Fanconi anemia core complex-associated protein 20    |
| Q9BTP7 | FAAP24    | Fanconi anemia core complex-associated protein 24    |
| Q13158 | FADD      | FAS-associated death domain protein                  |
| Q5T9C2 | FAM102A   | Protein FAM102A                                      |
| O94988 | FAM13A    | Protein FAM13A                                       |

|        |         |                                                                  |
|--------|---------|------------------------------------------------------------------|
| Q8IYM0 | FAM186B | Protein FAM186B                                                  |
| Q8NBR6 | FAM63B  | Protein FAM63B                                                   |
| Q8NEG4 | FAM83F  | Protein FAM83F                                                   |
| Q9BXW9 | FANCD2  | Fanconi anemia group D2 protein                                  |
| P25445 | FAS     | Tumor necrosis factor receptor superfamily member 6              |
| Q6P050 | FBXL22  | F-box and leucine-rich protein 22                                |
| Q8NFZ0 | FBXO18  | F-box DNA helicase 1                                             |
| Q2TAK1 | FBXO18  |                                                                  |
| Q02790 | FKBP4   | Peptidyl-prolyl cis-trans isomerase FKBP4                        |
| Q14318 | FKBP8   | Peptidyl-prolyl cis-trans isomerase FKBP8                        |
| O75369 | FLNB    | Filamin-B                                                        |
| Q9P2Q2 | FRMD4A  | FERM domain-containing protein 4A                                |
| P22083 | FUT4    | Alpha-(1,3)-fucosyltransferase 4                                 |
| P54710 | FXYD2   | Sodium/potassium-transporting ATPase subunit gamma               |
| Q9H0Q3 | FXYD6   | FXYD domain-containing ion transport regulator 6                 |
| Q9ULV1 | FZD4    | Frizzled-4                                                       |
| O14556 | GAPDHS  | Glyceraldehyde-3-phosphate dehydrogenase, testis-specific        |
| Q9NZC3 | GDE1    | Glycerophosphodiester phosphodiesterase 1                        |
| Q9UBU3 | GHRL    | Appetite-regulating hormone                                      |
| Q9BRT9 | GIN54   | DNA replication complex GINS protein SLD5                        |
| Q53GS7 | GLE1    | Nucleoporin GLE1                                                 |
| Q8IVS8 | GLYCK   | Glycerate kinase                                                 |
| P38405 | GNAL    | Guanine nucleotide-binding protein G(olf) subunit alpha          |
| P16520 | GNB3    | Guanine nucleotide-binding protein G(I)/G(S)/G(T) subunit beta-3 |
| Q8TDQ7 | GNPDA2  | Glucosamine-6-phosphate isomerase 2                              |
| Q6FGJ9 | GSTM3   |                                                                  |
| P21266 | GSTM3   | Glutathione S-transferase Mu 3                                   |
| Q4AE62 | GTDC1   | Glycosyltransferase-like domain-containing protein 1             |
| P49863 | GZMK    | Granzyme K                                                       |
| P61296 | HAND2   | Heart- and neural crest derivatives-expressed protein 2          |

|        |            |                                                                                |
|--------|------------|--------------------------------------------------------------------------------|
| Q9UL51 | HCN2       | Potassium/sodium hyperpolarization-activated cyclic nucleotide-gated channel 2 |
| Q9H0R4 | HDHD2      | Haloacid dehalogenase-like hydrolase domain-containing protein 2               |
| P06865 | HEXA       | Beta-hexosaminidase subunit alpha                                              |
| Q96MH2 | HEXIM2     | Protein HEXIM2                                                                 |
| Q5TEC6 | HIST2H3PS2 | Histone H3                                                                     |
| Q96LI6 | HSFY2      | Heat shock transcription factor, Y-linked                                      |
| P98160 | HSPG2      | Basement membrane-specific heparan sulfate proteoglycan core protein           |
| P48551 | IFNAR2     | Interferon alpha/beta receptor 2                                               |
| P15814 | IGLL1      | Immunoglobulin lambda-like polypeptide 1                                       |
| Q14005 | IL16       | Pro-interleukin-16                                                             |
| H0YKB7 | IL16       |                                                                                |
| Q8IUU6 | IL16       |                                                                                |
| Q9HBE5 | IL21R      | Interleukin-21 receptor                                                        |
| Q9NV31 | IMP3       | U3 small nucleolar ribonucleoprotein protein IMP3                              |
| Q9Y616 | IRAK3      | Interleukin-1 receptor-associated kinase 3                                     |
| P23229 | ITGA6      | Integrin alpha-6                                                               |
| Q8WWU7 | ITLN2      | Intelectin-2                                                                   |
| Q9BX67 | JAM3       | Junctional adhesion molecule C                                                 |
| Q674X7 | KAZN       | Kazrin                                                                         |
| Q9Y6H6 | KCNE3      | Potassium voltage-gated channel subfamily E member 3                           |
| Q4G0X4 | KCTD21     | BTB/POZ domain-containing protein KCTD21                                       |
| Q6PJI1 | KIF9       |                                                                                |
| Q9HAQ2 | KIF9       | Kinesin-like protein KIF9                                                      |
| Q9H0B6 | KLC2       | Kinesin light chain 2                                                          |
| O43240 | KLK10      | Kallikrein-10                                                                  |
| Q92876 | KLK6       | Kallikrein-6                                                                   |
| P01042 | KNG1       | Kininogen-1                                                                    |
| Q1ED39 | KNOP1      | Lysine-rich nucleolar protein 1                                                |
| P13646 | KRT13      | Keratin, type I cytoskeletal 13                                                |
| A1A4E9 | KRT13      |                                                                                |

|        |         |                                                                          |
|--------|---------|--------------------------------------------------------------------------|
| Q8NA19 | L3MBTL4 | Lethal(3)malignant brain tumor-like protein 4                            |
| Q43561 | LAT     | Linker for activation of T-cells family member 1                         |
| Q9GZY6 | LAT2    | Linker for activation of T-cells family member 2                         |
| O95835 | LATS1   | Serine/threonine-protein kinase LATS1                                    |
| Q6PJG3 | LATS1   |                                                                          |
| Q9NRM7 | LATS2   | Serine/threonine-protein kinase LATS2                                    |
| Q969G2 | LHX4    | LIM/homeobox protein Lhx4                                                |
| P15018 | LIF     | Leukemia inhibitory factor                                               |
| P42702 | LIFR    | Leukemia inhibitory factor receptor                                      |
| Q05469 | LIPE    | Hormone-sensitive lipase                                                 |
| Q9Y5X9 | LIPG    | Endothelial lipase                                                       |
| Q8IVB5 | LIX1L   | LIX1-like protein                                                        |
| Q6PJG9 | LRFN4   | Leucine-rich repeat and fibronectin type-III domain-containing protein 4 |
| Q96AG4 | LRRC59  | Leucine-rich repeat-containing protein 59                                |
| O15116 | LSM1    | U6 snRNA-associated Sm-like protein LSM1                                 |
| Q969L4 | LSM10   | U7 snRNA-associated Sm-like protein LSM10                                |
| P83369 | LSM11   | U7 snRNA-associated Sm-like protein LSM11                                |
| Q3MHD2 | LSM12   | Protein LSM12 homolog                                                    |
| Q8ND56 | LSM14A  | Protein LSM14 homolog A                                                  |
| Q9BX40 | LSM14B  | Protein LSM14 homolog B                                                  |
| P36941 | LTBR    | Tumor necrosis factor receptor superfamily member 3                      |
| Q8N2G4 | LYPD1   | Ly6/PLAUR domain-containing protein 1                                    |
| Q969L2 | MAL2    | Protein MAL2                                                             |
| Q02750 | MAP2K1  | Dual specificity mitogen-activated protein kinase kinase 1               |
| Q92918 | MAP4K1  | Mitogen-activated protein kinase kinase kinase kinase 1                  |
| Q49MG5 | MAP9    | Microtubule-associated protein 9                                         |
| O60307 | MAST3   | Microtubule-associated serine/threonine-protein kinase 3                 |
| P02686 | MBP     | Myelin basic protein                                                     |
| Q1JUL4 | MC1R    | Melanocyte-stimulating hormone receptor                                  |
| Q01726 | MC1R    | Melanocyte-stimulating hormone receptor                                  |

|        |         |                                                                                    |
|--------|---------|------------------------------------------------------------------------------------|
| O60318 | MCM3AP  | Germinal-center associated nuclear protein                                         |
| Q86YW9 | MED12L  | Mediator of RNA polymerase II transcription subunit 12-like protein                |
| Q9BUB5 | MKNK1   | MAP kinase-interacting serine/threonine-protein kinase 1                           |
| Q6NSB6 | MKRN3   |                                                                                    |
| Q13064 | MKRN3   | Probable E3 ubiquitin-protein ligase makorin-3                                     |
| Q9Y5R2 | MMP24   | Matrix metalloproteinase-24                                                        |
| Q9NPA2 | MMP25   | Matrix metalloproteinase-25                                                        |
| Q9BV20 | MRI1    | Methylthioribose-1-phosphate isomerase                                             |
| Q16540 | MRPL23  | 39S ribosomal protein L23, mitochondrial                                           |
| Q9BZE1 | MRPL37  | 39S ribosomal protein L37, mitochondrial                                           |
| P13995 | MTHFD2  | Bifunctional methylenetetrahydrofolate dehydrogenase/cyclohydrolase, mitochondrial |
| Q9H903 | MTHFD2L | Probable bifunctional methylenetetrahydrofolate dehydrogenase/cyclohydrolase 2     |
| P42898 | MTHFR   | Methylenetetrahydrofolate reductase                                                |
| Q9H2K0 | MTIF3   | Translation initiation factor IF-3, mitochondrial                                  |
| Q9Y216 | MTMR7   | Myotubularin-related protein 7                                                     |
| Q96QG7 | MTMR9   | Myotubularin-related protein 9                                                     |
| Q13505 | MTX1    | Metaxin-1                                                                          |
| Q9H3Q6 | MUC3A   |                                                                                    |
| Q02505 | MUC3A   | Mucin-3A                                                                           |
| A2RUH7 | MYBPHL  | Myosin-binding protein H-like                                                      |
| P14649 | MYL6B   | Myosin light chain 6B                                                              |
| Q9BXJ9 | NAA15   | N-alpha-acetyltransferase 15, NatA auxiliary subunit                               |
| Q8IZF0 | NALCN   | Sodium leak channel non-selective protein                                          |
| Q9NR45 | NANS    | Sialic acid synthase                                                               |
| Q8NEY1 | NAV1    | Neuron navigator 1                                                                 |
| Q96P71 | NECAB3  | N-terminal EF-hand calcium-binding protein 3                                       |
| Q7Z3B1 | NEGR1   | Neuronal growth regulator 1                                                        |
| P08138 | NGFR    | Tumor necrosis factor receptor superfamily member 16                               |
| P30419 | NMT1    | Glycylpeptide N-tetradecanoyltransferase 1                                         |
| O60936 | NOL3    | Nucleolar protein 3                                                                |

|        |         |                                                                |
|--------|---------|----------------------------------------------------------------|
| P78316 | NOP14   | Nucleolar protein 14                                           |
| Q6UXI9 | NPNT    | Nephrinectin                                                   |
| P22736 | NR4A1   | Nuclear receptor subfamily 4 group A member 1                  |
| Q92686 | NRGN    | Neurogranin                                                    |
| Q8IVF1 | NUTM2A  | NUT family member 2A                                           |
| Q8IXM7 | ODF3L1  | Outer dense fiber protein 3-like protein 1                     |
| Q5TC84 | OGFRL1  | Opioid growth factor receptor-like protein 1                   |
| B1AKJ6 | OSBPL9  | Oxysterol-binding protein                                      |
| Q96SU4 | OSBPL9  | Oxysterol-binding protein-related protein 9                    |
| O15460 | P4HA2   | Prolyl 4-hydroxylase subunit alpha-2                           |
| Q9NXX6 | PAQR5   | Membrane progesterin receptor gamma                            |
| Q06710 | PAX8    | Paired box protein Pax-8                                       |
| Q15365 | PCBP1   | Poly(rC)-binding protein 1                                     |
| Q53SS8 | PCBP1   |                                                                |
| O94913 | PCF11   | Pre-mRNA cleavage complex 2 protein Pcf11                      |
| O76074 | PDE5A   | cGMP-specific 3',5'-cyclic phosphodiesterase                   |
| Q9NP56 | PDE7B   | cAMP-specific 3',5'-cyclic phosphodiesterase 7B                |
| Q8N2H9 | PELI3   | E3 ubiquitin-protein ligase pellino homolog 3                  |
| Q6ZVD8 | PHLPP2  | PH domain leucine-rich repeat-containing protein phosphatase 2 |
| Q9Y2B9 | PKIG    | cAMP-dependent protein kinase inhibitor gamma                  |
| Q549H9 | PKIG    |                                                                |
| Q9UP65 | PLA2G4C | Cytosolic phospholipase A2 gamma                               |
| Q9HB19 | PLEKHA2 | Pleckstrin homology domain-containing family A member 2        |
| Q8IUU5 | PLXDC1  | Plexin domain-containing protein 1                             |
| Q5H9R7 | PPP6R3  | Serine/threonine-protein phosphatase 6 regulatory subunit 3    |
| H7BXH2 | PPP6R3  |                                                                |
| O14744 | PRMT5   | Protein arginine N-methyltransferase 5                         |
| D3DWI6 | PSCA    |                                                                |
| P23467 | PTPRB   | Receptor-type tyrosine-protein phosphatase beta                |
| Q86Y79 | PTRH1   | Probable peptidyl-tRNA hydrolase                               |

|        |         |                                                    |
|--------|---------|----------------------------------------------------|
| Q9H3Y0 | R3HDML  | Peptidase inhibitor R3HDML                         |
| P61006 | RAB8A   | Ras-related protein Rab-8A                         |
| Q7Z790 | RAD51L3 |                                                    |
| Q92698 | RAD54L  | DNA repair and recombination protein RAD54-like    |
| H0Y760 | RAD54L2 |                                                    |
| Q9Y4B4 | RAD54L2 | Helicase ARIP4                                     |
| Q9UKA8 | RCAN3   | Calcipressin-3                                     |
| Q8NC24 | RELL2   | RELT-like protein 2                                |
| Q8WZ73 | RFFL    | E3 ubiquitin-protein ligase rififylin              |
| P49802 | RGS7    | Regulator of G-protein signaling 7                 |
| Q6MZT1 | RGS7BP  | Regulator of G-protein signaling 7-binding protein |
| Q9HBH0 | RHOF    | Rho-related GTP-binding protein RhoF               |
| P17081 | RHOQ    | Rho-related GTP-binding protein RhoQ               |
| Q96PX1 | RNF157  | RING finger protein 157                            |
| P35398 | RORA    | Nuclear receptor ROR-alpha                         |
| P63173 | RPL38   | 60S ribosomal protein L38                          |
| Q8N122 | RPTOR   | Regulatory-associated protein of mTOR              |
| Q96IZ7 | RSRC1   | Serine/Arginine-related protein 53                 |
| H7C5Q0 | RSRC1   |                                                    |
| B5BUB1 | RUVBL1  | RuvB-like helicase                                 |
| Q9Y265 | RUVBL1  | RuvB-like 1                                        |
| P23297 | S100A1  | Protein S100-A1                                    |
| P60903 | S100A10 | Protein S100-A10                                   |
| P31949 | S100A11 | Protein S100-A11                                   |
| P80511 | S100A12 | Protein S100-A12                                   |
| Q99584 | S100A13 | Protein S100-A13                                   |
| Q9HCY8 | S100A14 | Protein S100-A14                                   |
| Q96FQ6 | S100A16 | Protein S100-A16                                   |
| Q6SZW1 | SARM1   | Sterile alpha and TIR motif-containing protein 1   |
| Q0D2N8 | SARM1   |                                                    |

|        |          |                                                                |
|--------|----------|----------------------------------------------------------------|
| Q86WG5 | SBF2     | Myotubularin-related protein 13                                |
| Q6ZMJ2 | SCARA5   | Scavenger receptor class A member 5                            |
| Q6UWF3 | SCIMP    | SLP adapter and CSK-interacting membrane protein               |
| Q8IWY4 | SCUBE1   | Signal peptide, CUB and EGF-like domain-containing protein 1   |
| Q8IZE3 | SCYL3    | Protein-associating with the carboxyl-terminal domain of ezrin |
| Q9NZV5 | SEPN1    | Selenoprotein N                                                |
| Q9H4I8 | SERHL2   | Serine hydrolase-like protein 2                                |
| Q9Y3L3 | SH3BP1   | SH3 domain-binding protein 1                                   |
| Q149N8 | SHPRH    | E3 ubiquitin-protein ligase SHPRH                              |
| P84550 | SKOR1    | SKI family transcriptional corepressor 1                       |
| Q8TF71 | SLC16A10 | Monocarboxylate transporter 10                                 |
| O75387 | SLC43A1  | Large neutral amino acids transporter small subunit 3          |
| Q8N370 | SLC43A2  | Large neutral amino acids transporter small subunit 4          |
| P31641 | SLC6A6   | Sodium- and chloride-dependent taurine transporter             |
| Q9UPY5 | SLC7A11  | Cystine/glutamate transporter                                  |
| Q8TBB6 | SLC7A14  | Probable cationic amino acid transporter                       |
| Q01650 | SLC7A5   | Large neutral amino acids transporter small subunit 1          |
| Q9UHI5 | SLC7A8   | Large neutral amino acids transporter small subunit 2          |
| O75094 | SLIT3    | Slit homolog 3 protein                                         |
| Q9BVW6 | SMIM2    | Small integral membrane protein 2                              |
| Q8N5G0 | SMIM20   | Small integral membrane protein 20                             |
| Q92485 | SMPDL3B  | Acid sphingomyelinase-like phosphodiesterase 3b                |
| F8VWW8 | SMPDL3B  |                                                                |
| Q7Z614 | SNX20    | Sorting nexin-20                                               |
| Q7Z572 | SPATA21  | Spermatogenesis-associated protein 21                          |
| Q15772 | SPEG     | Striated muscle preferentially expressed protein kinase        |
| B9ZVR7 | SPEG     |                                                                |
| Q68D10 | SPTY2D1  | Protein SPT2 homolog                                           |
| Q96SB4 | SRPK1    | SRSF protein kinase 1                                          |
| Q687X5 | STEAP4   | Metalloreductase STEAP4                                        |

|        |           |                                                               |
|--------|-----------|---------------------------------------------------------------|
| Q86TM6 | SYVN1     | E3 ubiquitin-protein ligase synoviolin                        |
| Q7Z422 | SZRD1     | SUZ domain-containing protein 1                               |
| Q03518 | TAP1      | Antigen peptide transporter 1                                 |
| Q9P2M4 | TBC1D14   | TBC1 domain family member 14                                  |
| Q15370 | TCEB2     | Transcription elongation factor B polypeptide 2               |
| O43680 | TCF21     | Transcription factor 21                                       |
| P56279 | TCL1A     | T-cell leukemia/lymphoma protein 1A                           |
| P58753 | TIRAP     | Toll/interleukin-1 receptor domain-containing adapter protein |
| Q9Y4G6 | TLN2      | Talin-2                                                       |
| Q96DZ7 | TM4SF19   | Transmembrane 4 L6 family member 19                           |
| Q8IV31 | TMEM139   | Transmembrane protein 139                                     |
| Q96B77 | TMEM186   | Transmembrane protein 186                                     |
| Q9BRR3 | TMEM246   | Transmembrane protein 246                                     |
| Q9NX78 | TMEM260   | Transmembrane protein 260                                     |
| Q6P2H8 | TMEM53    | Transmembrane protein 53                                      |
| Q8NBN3 | TMEM87A   | Transmembrane protein 87A                                     |
| P63313 | TMSB10    | Thymosin beta-10                                              |
| Q9Y6Q6 | TNFRSF11A | Tumor necrosis factor receptor superfamily member 11A         |
| Q9NP84 | TNFRSF12A | Tumor necrosis factor receptor superfamily member 12A         |
| Q92956 | TNFRSF14  | Tumor necrosis factor receptor superfamily member 14          |
| Q02223 | TNFRSF17  | Tumor necrosis factor receptor superfamily member 17          |
| Q9Y5U5 | TNFRSF18  | Tumor necrosis factor receptor superfamily member 18          |
| Q9NS68 | TNFRSF19  | Tumor necrosis factor receptor superfamily member 19          |
| P19438 | TNFRSF1A  | Tumor necrosis factor receptor superfamily member 1A          |
| P20333 | TNFRSF1B  | Tumor necrosis factor receptor superfamily member 1B          |
| O75509 | TNFRSF21  | Tumor necrosis factor receptor superfamily member 21          |
| Q93038 | TNFRSF25  | Tumor necrosis factor receptor superfamily member 25          |
| P43489 | TNFRSF4   | Tumor necrosis factor receptor superfamily member 4           |
| P28908 | TNFRSF8   | Tumor necrosis factor receptor superfamily member 8           |
| Q07011 | TNFRSF9   | Tumor necrosis factor receptor superfamily member 9           |

|        |          |                                                          |
|--------|----------|----------------------------------------------------------|
| O15417 | TNRC18   | Trinucleotide repeat-containing gene 18 protein          |
| Q9BTF3 | TNRC4    |                                                          |
| Q8NDV7 | TNRC6A   | Trinucleotide repeat-containing gene 6A protein          |
| Q9UPQ9 | TNRC6B   | Trinucleotide repeat-containing gene 6B protein          |
| Q9HCJ0 | TNRC6C   | Trinucleotide repeat-containing gene 6C protein          |
| Q6UXN7 | TOMM20L  | TOMM20-like protein 1                                    |
| Q8N2E6 | TOR2A    | Prosalusin                                               |
| Q5JU69 | TOR2A    | Torsin-2A                                                |
| O43280 | TREH     | Trehalase                                                |
| Q15642 | TRIP10   | Cdc42-interacting protein 4                              |
| Q9BVS5 | TRMT61B  | tRNA (adenine(58)-N(1))-methyltransferase, mitochondrial |
| Q9NX07 | TRNAU1AP | tRNA selenocysteine 1-associated protein 1               |
| Q12815 | TROAP    | Tastin                                                   |
| Q9Y2X8 | UBE2D4   | Ubiquitin-conjugating enzyme E2 D4                       |
| Q14139 | UBE4A    | Ubiquitin conjugation factor E4 A                        |
| Q9Y6I4 | USP3     | Ubiquitin carboxyl-terminal hydrolase 3                  |
| Q70CQ3 | USP30    | Ubiquitin carboxyl-terminal hydrolase 30                 |
| Q70CQ4 | USP31    | Ubiquitin carboxyl-terminal hydrolase 31                 |
| Q4VC15 | USP32    |                                                          |
| Q8NFA0 | USP32    | Ubiquitin carboxyl-terminal hydrolase 32                 |
| Q8TEY7 | USP33    | Ubiquitin carboxyl-terminal hydrolase 33                 |
| Q70CQ2 | USP34    | Ubiquitin carboxyl-terminal hydrolase 34                 |
| Q9P2H5 | USP35    | Ubiquitin carboxyl-terminal hydrolase 35                 |
| E9PK78 | USP35    |                                                          |
| Q9P275 | USP36    | Ubiquitin carboxyl-terminal hydrolase 36                 |
| Q86T82 | USP37    | Ubiquitin carboxyl-terminal hydrolase 37                 |
| Q8NB14 | USP38    | Ubiquitin carboxyl-terminal hydrolase 38                 |
| Q53GS9 | USP39    | U4/U6.U5 tri-snRNP-associated protein 2                  |
| Q7L8A9 | VASH1    | Vasohibin-1                                              |
| P23381 | WARS     | Tryptophan--tRNA ligase, cytoplasmic                     |

|        |         |                                               |
|--------|---------|-----------------------------------------------|
| Q9UGM6 | WARS2   | Tryptophan--tRNA ligase, mitochondrial        |
| Q9UNX4 | WDR3    | WD repeat-containing protein 3                |
| Q8NA23 | WDR31   | WD repeat-containing protein 31               |
| Q9C0J8 | WDR33   | pre-mRNA 3' end processing protein WDR33      |
| Q96EX3 | WDR34   | WD repeat-containing protein 34               |
| Q9P2L0 | WDR35   | WD repeat-containing protein 35               |
| Q8NI36 | WDR36   | WD repeat-containing protein 36               |
| Q9Y2I8 | WDR37   | WD repeat-containing protein 37               |
| Q6RFH5 | WDR74   | WD repeat-containing protein 74               |
| Q93097 | WNT2B   | Protein Wnt-2b                                |
| Q01831 | XPC     | DNA repair protein complementing XP-C cells   |
| Q9ULM3 | YEATS2  | YEATS domain-containing protein 2             |
| Q8N5H6 | YEATS2  |                                               |
| O60688 | YPEL1   | Protein yippee-like 1                         |
| Q96IU2 | ZBED3   | Zinc finger BED domain-containing protein 3   |
| Q8N2G6 | ZCCHC24 | Zinc finger CCHC domain-containing protein 24 |
| Q9H4I2 | ZHX3    | Zinc fingers and homeoboxes protein 3         |
| P17041 | ZNF32   | Zinc finger protein 32                        |
| A2RRD8 | ZNF320  | Zinc finger protein 320                       |
| Q8N8H1 | ZNF321P | Putative protein ZNF321                       |
| Q6U7Q0 | ZNF322  | Zinc finger protein 322                       |
| O75467 | ZNF324  | Zinc finger protein 324A                      |
| Q6AW86 | ZNF324B | Zinc finger protein 324B                      |
| Q5BKZ1 | ZNF326  | DBIRD complex subunit ZNF326                  |
| Q86UD4 | ZNF329  | Zinc finger protein 329                       |
| Q96JM2 | ZNF462  | Zinc finger protein 462                       |
| Q6ZNH5 | ZNF497  | Zinc finger protein 497                       |
| Q8ND25 | ZNRF1   | E3 ubiquitin-protein ligase ZNRF1             |
