# Supplementary material
Source: PubMed Central journal article supplement (PMC7610982)
Supplement: EMS126982-supplement-Supplementary_Table7.pdf [file EMS126982-supplement-Supplementary_Table7.pdf]

## 1125 0-30%IDR proteins

43 matches in MIR-Inc S-AS list

100000 random sets of 1125 proteins from the D2P2 dataset to mimic the set of 0-30%IDR those against MIRInc S-AS list of 989 proteins

mean random matches 58

| r  | Freq |
|----|------|
| 28 | 1    |
| 30 | 1    |
| 31 | 1    |
| 32 | 2    |
| 33 | 4    |
| 34 | 10   |
| 35 | 16   |
| 36 | 30   |
| 37 | 40   |
| 38 | 69   |
| 39 | 134  |
| 40 | 191  |
| 41 | 291  |
| 42 | 416  |
| 43 | 517  |
| 44 | 685  |
| 45 | 1000 |
| 46 | 1246 |
| 47 | 1675 |
| 48 | 1951 |
| 49 | 2461 |
| 50 | 2977 |
| 51 | 3469 |
| 52 | 3791 |
| 53 | 4236 |
| 54 | 4739 |
| 55 | 5077 |
| 56 | 5328 |
| 57 | 5576 |
| 58 | 5565 |
| 59 | 5513 |
| 60 | 5265 |
| 61 | 5022 |
| 62 | 4659 |
| 63 | 4433 |
| 64 | 3962 |

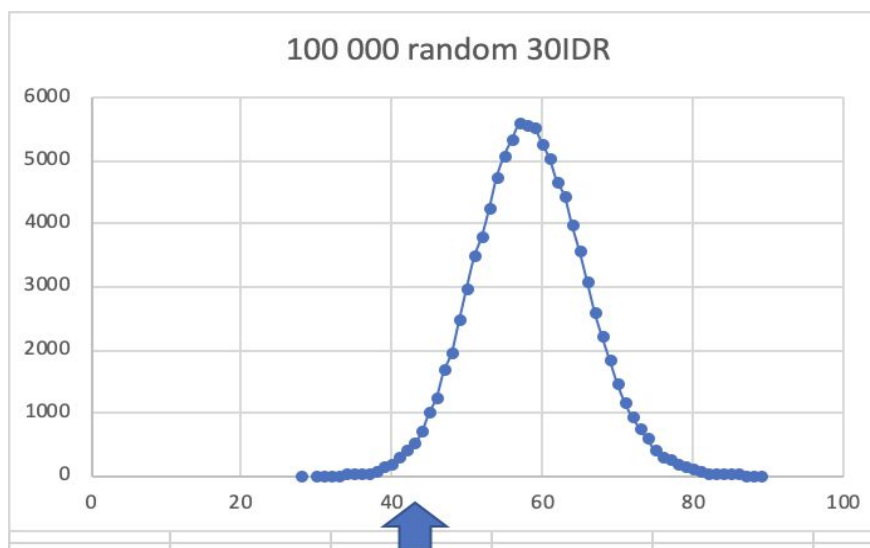

```
> 1-pnorm(43, mean(r), sd(r))  
[1] 0.9833076
```

|    |      |
|----|------|
| 65 | 3549 |
| 66 | 3075 |
| 67 | 2587 |
| 68 | 2197 |
| 69 | 1832 |
| 70 | 1464 |
| 71 | 1164 |
| 72 | 929  |
| 73 | 755  |
| 74 | 579  |
| 75 | 414  |
| 76 | 304  |
| 77 | 238  |
| 78 | 175  |
| 79 | 135  |
| 80 | 96   |
| 81 | 55   |
| 82 | 31   |
| 83 | 23   |
| 84 | 16   |
| 85 | 10   |
| 86 | 9    |
| 87 | 4    |
| 88 | 2    |
| 89 | 4    |

to match

—

## 7443 50-90%IDR proteins

375 matches in MIRInc S-AS list

100000 random sets of 7443 proteins from the D2P2 dataset to mimic the set of 50-90%IDR those against MIRInc S-AS list of 989 proteins

mean random matches 385

| r   | Freq |
|-----|------|
| 320 | 1    |
| 323 | 2    |
| 326 | 1    |
| 327 | 1    |
| 328 | 1    |
| 329 | 4    |
| 331 | 2    |
| 332 | 2    |
| 333 | 9    |
| 334 | 3    |
| 335 | 4    |
| 336 | 11   |
| 337 | 18   |
| 338 | 11   |
| 339 | 17   |
| 340 | 29   |
| 341 | 32   |
| 342 | 28   |
| 343 | 32   |
| 344 | 43   |
| 345 | 72   |
| 346 | 69   |
| 347 | 85   |
| 348 | 113  |
| 349 | 133  |
| 350 | 144  |
| 351 | 161  |
| 352 | 203  |
| 353 | 217  |
| 354 | 287  |
| 355 | 308  |
| 356 | 334  |
| 357 | 397  |
| 358 | 471  |
| 359 | 514  |
| 360 | 598  |

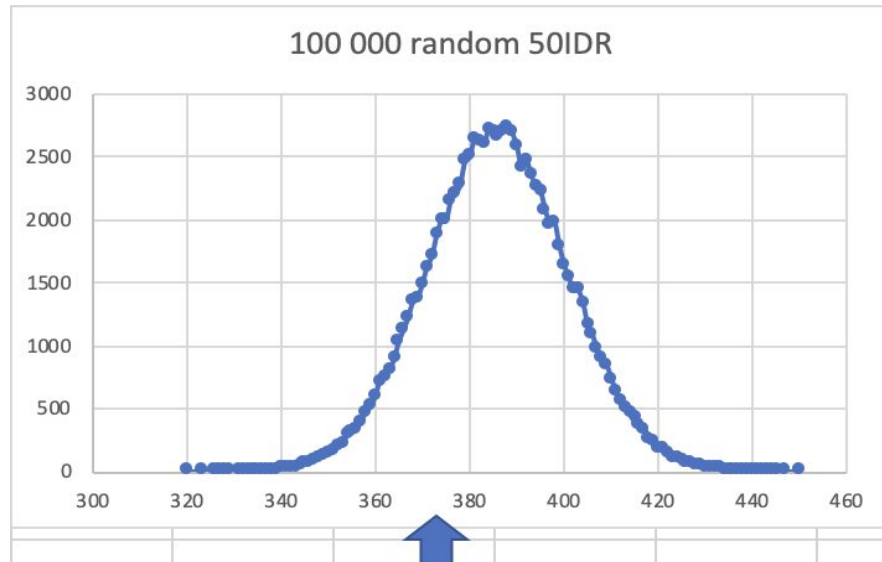

```
1-pnorm(375, mean(r), sd(r))
```

```
[1] 0.7672925
```

|     |      |
|-----|------|
| 361 | 715  |
| 362 | 755  |
| 363 | 803  |
| 364 | 892  |
| 365 | 1028 |
| 366 | 1123 |
| 367 | 1224 |
| 368 | 1347 |
| 369 | 1377 |
| 370 | 1489 |
| 371 | 1624 |
| 372 | 1707 |
| 373 | 1870 |
| 374 | 1988 |
| 375 | 1988 |
| 376 | 2145 |
| 377 | 2199 |
| 378 | 2274 |
| 379 | 2457 |
| 380 | 2493 |
| 381 | 2635 |
| 382 | 2620 |
| 383 | 2590 |
| 384 | 2713 |
| 385 | 2688 |
| 386 | 2657 |
| 387 | 2698 |
| 388 | 2734 |
| 389 | 2684 |
| 390 | 2574 |
| 391 | 2414 |
| 392 | 2467 |
| 393 | 2351 |
| 394 | 2263 |
| 395 | 2220 |
| 396 | 2074 |
| 397 | 1957 |
| 398 | 1972 |
| 399 | 1784 |
| 400 | 1642 |
| 401 | 1535 |
| 402 | 1437 |
| 403 | 1436 |

|     |      |
|-----|------|
| 404 | 1333 |
| 405 | 1157 |
| 406 | 1079 |
| 407 | 970  |
| 408 | 896  |
| 409 | 845  |
| 410 | 731  |
| 411 | 641  |
| 412 | 557  |
| 413 | 507  |
| 414 | 456  |
| 415 | 418  |
| 416 | 370  |
| 417 | 338  |
| 418 | 254  |
| 419 | 237  |
| 420 | 179  |
| 421 | 172  |
| 422 | 134  |
| 423 | 111  |
| 424 | 104  |
| 425 | 87   |
| 426 | 76   |
| 427 | 64   |
| 428 | 50   |
| 429 | 48   |
| 430 | 36   |
| 431 | 38   |
| 432 | 28   |
| 433 | 20   |
| 434 | 13   |
| 435 | 11   |
| 436 | 10   |
| 437 | 4    |
| 438 | 3    |
| 439 | 4    |
| 440 | 6    |
| 441 | 6    |
| 442 | 2    |
| 443 | 1    |
| 444 | 1    |
| 445 | 1    |
| 447 | 1    |



to match

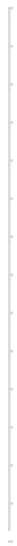



## 6923 >90%IDR proteins

399 matches in MIRInc S-AS list

100000 random sets of 6923 proteins from the D2P2 dataset to mimic the set of >90%IDR those against MIRInc S-AS list of 989 proteins

mean random matches 359

| r   | Freq |
|-----|------|
| 296 | 1    |
| 299 | 1    |
| 301 | 1    |
| 302 | 1    |
| 303 | 1    |
| 304 | 3    |
| 305 | 2    |
| 306 | 5    |
| 307 | 8    |
| 308 | 6    |
| 309 | 11   |
| 310 | 10   |
| 311 | 13   |
| 312 | 22   |
| 313 | 18   |
| 314 | 23   |
| 315 | 22   |
| 316 | 30   |
| 317 | 45   |
| 318 | 46   |
| 319 | 65   |
| 320 | 79   |
| 321 | 86   |
| 322 | 114  |
| 323 | 147  |
| 324 | 153  |
| 325 | 179  |
| 326 | 215  |
| 327 | 283  |
| 328 | 283  |
| 329 | 317  |
| 330 | 366  |
| 331 | 463  |
| 332 | 508  |
| 333 | 552  |
| 334 | 634  |

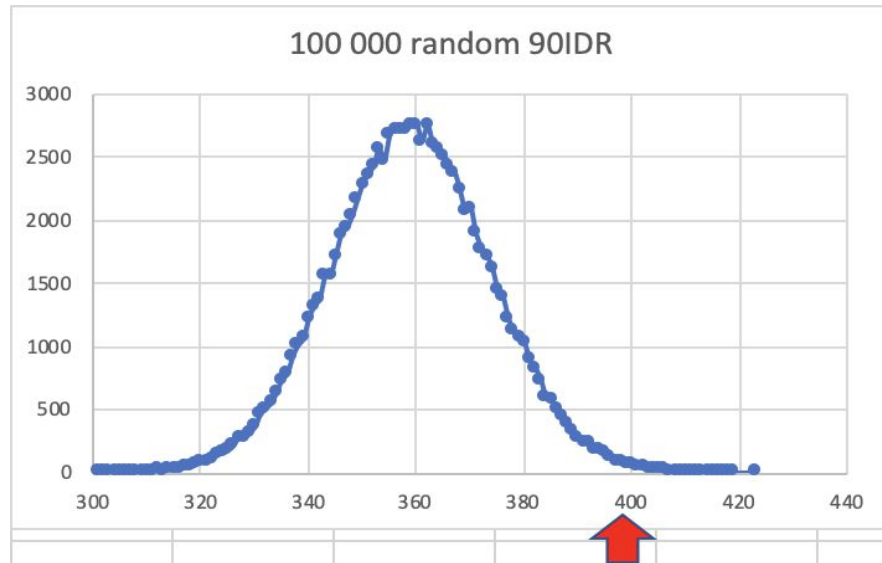

```
> 1-pnorm(399, mean(r), sd(r))
```

```
[1] 0.003222704
```

```
Bonferroni's p-value      0.00966811
```

|     |      |
|-----|------|
| 335 | 737  |
| 336 | 783  |
| 337 | 919  |
| 338 | 1006 |
| 339 | 1062 |
| 340 | 1222 |
| 341 | 1316 |
| 342 | 1374 |
| 343 | 1549 |
| 344 | 1552 |
| 345 | 1716 |
| 346 | 1882 |
| 347 | 1931 |
| 348 | 2024 |
| 349 | 2155 |
| 350 | 2282 |
| 351 | 2360 |
| 352 | 2421 |
| 353 | 2554 |
| 354 | 2471 |
| 355 | 2664 |
| 356 | 2713 |
| 357 | 2703 |
| 358 | 2703 |
| 359 | 2749 |
| 360 | 2750 |
| 361 | 2620 |
| 362 | 2742 |
| 363 | 2590 |
| 364 | 2559 |
| 365 | 2506 |
| 366 | 2425 |
| 367 | 2375 |
| 368 | 2230 |
| 369 | 2063 |
| 370 | 2088 |
| 371 | 1889 |
| 372 | 1772 |
| 373 | 1712 |
| 374 | 1617 |
| 375 | 1449 |
| 376 | 1388 |
| 377 | 1220 |

|     |      |
|-----|------|
| 378 | 1118 |
| 379 | 1070 |
| 380 | 1023 |
| 381 | 889  |
| 382 | 827  |
| 383 | 737  |
| 384 | 594  |
| 385 | 578  |
| 386 | 496  |
| 387 | 444  |
| 388 | 393  |
| 389 | 338  |
| 390 | 283  |
| 391 | 239  |
| 392 | 230  |
| 393 | 181  |
| 394 | 185  |
| 395 | 156  |
| 396 | 118  |
| 397 | 93   |
| 398 | 83   |
| 399 | 63   |
| 400 | 67   |
| 401 | 44   |
| 402 | 40   |
| 403 | 27   |
| 404 | 24   |
| 405 | 22   |
| 406 | 20   |
| 407 | 16   |
| 408 | 6    |
| 409 | 5    |
| 410 | 7    |
| 411 | 8    |
| 412 | 2    |
| 413 | 6    |
| 414 | 3    |
| 415 | 2    |
| 416 | 3    |
| 417 | 1    |
| 418 | 1    |
| 419 | 1    |
| 423 | 1    |

to match

\_\_\_\_\_

| <i>Numb. Proteins</i> | <b>IDs</b> |            |            |           |
|-----------------------|------------|------------|------------|-----------|
|                       | <b>989</b> | <b>399</b> | <b>375</b> | <b>43</b> |
| ENSG00000000457       | NA         | NA         | 50IDR      | NA        |
| ENSG00000001461       | NA         | NA         | 50IDR      | NA        |
| ENSG00000002746       | NA         | NA         | 50IDR      | NA        |
| ENSG00000003987       | NA         | NA         | 50IDR      | NA        |
| ENSG00000004139       | NA         | NA         | NA         | NA        |
| ENSG00000004478       | 90IDR      | NA         | NA         | NA        |
| ENSG00000004866       | 90IDR      | NA         | NA         | NA        |
| ENSG00000005108       | NA         | NA         | 50IDR      | NA        |
| ENSG00000005379       | NA         | NA         | 50IDR      | NA        |
| ENSG00000005483       | 90IDR      | NA         | NA         | NA        |
| ENSG00000005810       | NA         | NA         | 50IDR      | NA        |
| ENSG00000005844       | NA         | NA         | NA         | NA        |
| ENSG00000006530       | 90IDR      | NA         | NA         | NA        |
| ENSG00000007202       | NA         | NA         | NA         | NA        |
| ENSG00000008382       | NA         | NA         | 50IDR      | NA        |
| ENSG00000008516       | NA         | NA         | 50IDR      | NA        |
| ENSG00000009413       | 90IDR      | NA         | NA         | NA        |
| ENSG00000010282       | NA         | NA         | NA         | NA        |
| ENSG00000010292       | 90IDR      | NA         | NA         | NA        |
| ENSG00000012232       | NA         | NA         | NA         | NA        |
| ENSG00000013293       | NA         | NA         | 50IDR      | NA        |
| ENSG00000013573       | 90IDR      | NA         | NA         | NA        |
| ENSG00000015479       | 90IDR      | NA         | NA         | NA        |
| ENSG00000018510       | NA         | NA         | 50IDR      | NA        |
| ENSG00000025796       | NA         | NA         | 50IDR      | NA        |
| ENSG00000026025       | NA         | NA         | 50IDR      | NA        |
| ENSG00000029534       | NA         | NA         | 50IDR      | NA        |
| ENSG00000033100       | NA         | NA         | 50IDR      | NA        |
| ENSG00000034510       | 90IDR      | NA         | NA         | NA        |
| ENSG00000035664       | NA         | NA         | NA         | NA        |
| ENSG00000036530       | NA         | NA         | NA         | NA        |
| ENSG00000037241       | 90IDR      | NA         | NA         | NA        |
| ENSG00000037749       | NA         | NA         | 50IDR      | NA        |
| ENSG00000037757       | NA         | NA         | NA         | NA        |
| ENSG00000040199       | NA         | NA         | NA         | NA        |
| ENSG00000047578       | NA         | NA         | 50IDR      | NA        |
| ENSG00000049283       | 90IDR      | NA         | NA         | NA        |
| ENSG00000049540       | 90IDR      | NA         | NA         | NA        |
| ENSG00000051128       | NA         | NA         | 50IDR      | NA        |
| ENSG00000053918       | NA         | NA         | 50IDR      | NA        |
| ENSG00000054356       | 90IDR      | NA         | NA         | NA        |

|                 |       |       |       |
|-----------------|-------|-------|-------|
| ENSG00000055070 | 90IDR | NA    | NA    |
| ENSG00000055813 | NA    | 50IDR | NA    |
| ENSG00000056736 | NA    | NA    | NA    |
| ENSG00000056972 | NA    | 50IDR | NA    |
| ENSG00000059915 | NA    | 50IDR | NA    |
| ENSG00000061938 | 90IDR | NA    | NA    |
| ENSG00000062282 | NA    | NA    | 30IDR |
| ENSG00000063180 | NA    | NA    | NA    |
| ENSG00000064309 | NA    | 50IDR | NA    |
| ENSG00000064703 | NA    | 50IDR | NA    |
| ENSG00000065183 | 90IDR | NA    | NA    |
| ENSG00000065534 | 90IDR | NA    | NA    |
| ENSG00000065911 | 90IDR | NA    | NA    |
| ENSG00000066032 | 90IDR | NA    | NA    |
| ENSG00000066136 | 90IDR | NA    | NA    |
| ENSG00000066379 | NA    | 50IDR | NA    |
| ENSG00000066827 | 90IDR | NA    | NA    |
| ENSG00000066923 | 90IDR | NA    | NA    |
| ENSG00000069667 | 90IDR | NA    | NA    |
| ENSG00000069966 | NA    | NA    | 30IDR |
| ENSG00000070269 | NA    | 50IDR | NA    |
| ENSG00000070614 | 90IDR | NA    | NA    |
| ENSG00000071246 | NA    | 50IDR | NA    |
| ENSG00000072071 | NA    | 50IDR | NA    |
| ENSG00000072195 | 90IDR | NA    | NA    |
| ENSG00000072201 | 90IDR | NA    | NA    |
| ENSG00000072657 | NA    | NA    | 30IDR |
| ENSG00000072682 | 90IDR | NA    | NA    |
| ENSG00000072952 | 90IDR | NA    | NA    |
| ENSG00000073050 | NA    | 50IDR | NA    |
| ENSG00000075391 | 90IDR | NA    | NA    |
| ENSG00000075711 | 90IDR | NA    | NA    |
| ENSG00000076351 | NA    | 50IDR | NA    |
| ENSG00000076382 | NA    | 50IDR | NA    |
| ENSG00000077063 | 90IDR | NA    | NA    |
| ENSG00000077782 | 90IDR | NA    | NA    |
| ENSG00000077809 | 90IDR | NA    | NA    |
| ENSG00000078618 | NA    | NA    | 30IDR |
| ENSG00000078795 | NA    | 50IDR | NA    |
| ENSG00000078967 | 90IDR | NA    | NA    |
| ENSG00000079263 | NA    | 50IDR | NA    |
| ENSG00000079277 | 90IDR | NA    | NA    |
| ENSG00000079337 | 90IDR | NA    | NA    |

|                 |       |       |       |
|-----------------|-------|-------|-------|
| ENSG00000079385 | NA    | 50IDR | NA    |
| ENSG00000079435 | NA    | 50IDR | NA    |
| ENSG00000080824 | NA    | NA    | NA    |
| ENSG00000081189 | 90IDR | NA    | NA    |
| ENSG00000082014 | 90IDR | NA    | NA    |
| ENSG00000082805 | 90IDR | NA    | NA    |
| ENSG00000083312 | NA    | NA    | NA    |
| ENSG00000084636 | 90IDR | NA    | NA    |
| ENSG00000085117 | 90IDR | NA    | NA    |
| ENSG00000085274 | NA    | NA    | NA    |
| ENSG00000085733 | 90IDR | NA    | NA    |
| ENSG00000085831 | 90IDR | NA    | NA    |
| ENSG00000085999 | NA    | NA    | NA    |
| ENSG00000086570 | NA    | NA    | 30IDR |
| ENSG00000086598 | NA    | 50IDR | NA    |
| ENSG00000087269 | NA    | 50IDR | NA    |
| ENSG00000088320 | NA    | 50IDR | NA    |
| ENSG00000088727 | 90IDR | NA    | NA    |
| ENSG00000088756 | 90IDR | NA    | NA    |
| ENSG00000089009 | 90IDR | NA    | NA    |
| ENSG00000089022 | 90IDR | NA    | NA    |
| ENSG00000089053 | 90IDR | NA    | NA    |
| ENSG00000089127 | NA    | NA    | NA    |
| ENSG00000089159 | 90IDR | NA    | NA    |
| ENSG00000090339 | NA    | NA    | NA    |
| ENSG00000090376 | NA    | NA    | NA    |
| ENSG00000090889 | 90IDR | NA    | NA    |
| ENSG00000091409 | NA    | 50IDR | NA    |
| ENSG00000091436 | NA    | 50IDR | NA    |
| ENSG00000091542 | NA    | 50IDR | NA    |
| ENSG00000091664 | NA    | NA    | NA    |
| ENSG00000091879 | NA    | 50IDR | NA    |
| ENSG00000092098 | NA    | 50IDR | NA    |
| ENSG00000092421 | 90IDR | NA    | NA    |
| ENSG00000092841 | 90IDR | NA    | NA    |
| ENSG00000092871 | 90IDR | NA    | NA    |
| ENSG00000094755 | 90IDR | NA    | NA    |
| ENSG00000095321 | 90IDR | NA    | NA    |
| ENSG00000095485 | NA    | NA    | NA    |
| ENSG00000095574 | NA    | 50IDR | NA    |
| ENSG00000095585 | 90IDR | NA    | NA    |
| ENSG00000096063 | 90IDR | NA    | NA    |
| ENSG00000099308 | NA    | 50IDR | NA    |

|                 |       |       |       |
|-----------------|-------|-------|-------|
| ENSG00000099364 | NA    | 50IDR | NA    |
| ENSG00000099385 | 90IDR | NA    | NA    |
| ENSG00000099810 | 90IDR | NA    | NA    |
| ENSG00000099822 | NA    | 50IDR | NA    |
| ENSG00000100024 | 90IDR | NA    | NA    |
| ENSG00000100027 | 90IDR | NA    | NA    |
| ENSG00000100092 | 90IDR | NA    | NA    |
| ENSG00000100154 | NA    | 50IDR | NA    |
| ENSG00000100167 | 90IDR | NA    | NA    |
| ENSG00000100365 | NA    | 50IDR | NA    |
| ENSG00000100393 | NA    | 50IDR | NA    |
| ENSG00000100395 | 90IDR | NA    | NA    |
| ENSG00000100439 | 90IDR | NA    | NA    |
| ENSG00000100462 | NA    | 50IDR | NA    |
| ENSG00000100473 | NA    | NA    | 30IDR |
| ENSG00000100578 | NA    | 50IDR | NA    |
| ENSG00000100626 | NA    | NA    | NA    |
| ENSG00000100697 | 90IDR | NA    | NA    |
| ENSG00000100721 | NA    | NA    | NA    |
| ENSG00000100852 | NA    | 50IDR | NA    |
| ENSG00000100985 | NA    | NA    | NA    |
| ENSG00000101384 | NA    | NA    | NA    |
| ENSG00000101425 | 90IDR | NA    | NA    |
| ENSG00000101473 | 90IDR | NA    | NA    |
| ENSG00000101945 | 90IDR | NA    | NA    |
| ENSG00000101955 | NA    | NA    | NA    |
| ENSG00000102003 | 90IDR | NA    | NA    |
| ENSG00000102452 | NA    | 50IDR | NA    |
| ENSG00000102786 | NA    | 50IDR | NA    |
| ENSG00000103043 | NA    | NA    | NA    |
| ENSG00000103274 | NA    | NA    | 30IDR |
| ENSG00000103310 | NA    | NA    | 30IDR |
| ENSG00000103335 | NA    | 50IDR | NA    |
| ENSG00000103351 | 90IDR | NA    | NA    |
| ENSG00000103363 | 90IDR | NA    | NA    |
| ENSG00000103522 | NA    | 50IDR | NA    |
| ENSG00000103534 | NA    | 50IDR | NA    |
| ENSG00000103550 | 90IDR | NA    | NA    |
| ENSG00000103569 | NA    | 50IDR | NA    |
| ENSG00000103599 | 90IDR | NA    | NA    |
| ENSG00000103978 | NA    | 50IDR | NA    |
| ENSG00000104643 | NA    | NA    | 30IDR |
| ENSG00000104805 | 90IDR | NA    | NA    |



|                 |       |       |       |
|-----------------|-------|-------|-------|
| ENSG00000104814 | NA    | 50IDR | NA    |
| ENSG00000104960 | NA    | 50IDR | NA    |
| ENSG00000105281 | NA    | 50IDR | NA    |
| ENSG00000105298 | NA    | 50IDR | NA    |
| ENSG00000105364 | NA    | 50IDR | NA    |
| ENSG00000105402 | NA    | NA    | 30IDR |
| ENSG00000105443 | NA    | 50IDR | NA    |
| ENSG00000105499 | NA    | NA    | 30IDR |
| ENSG00000105568 | NA    | NA    | NA    |
| ENSG00000105618 | NA    | 50IDR | NA    |
| ENSG00000105677 | NA    | 50IDR | NA    |
| ENSG00000105679 | NA    | NA    | NA    |
| ENSG00000105700 | NA    | 50IDR | NA    |
| ENSG00000105701 | NA    | 50IDR | NA    |
| ENSG00000105810 | NA    | NA    | 30IDR |
| ENSG00000105879 | 90IDR | NA    | NA    |
| ENSG00000105971 | NA    | 50IDR | NA    |
| ENSG00000106069 | NA    | 50IDR | NA    |
| ENSG00000106078 | 90IDR | NA    | NA    |
| ENSG00000106105 | 90IDR | NA    | NA    |
| ENSG00000106113 | 90IDR | NA    | NA    |
| ENSG00000106397 | 90IDR | NA    | NA    |
| ENSG00000106546 | NA    | 50IDR | NA    |
| ENSG00000106991 | NA    | NA    | NA    |
| ENSG00000107249 | 90IDR | NA    | NA    |
| ENSG00000107560 | NA    | 50IDR | NA    |
| ENSG00000107669 | NA    | 50IDR | NA    |
| ENSG00000107758 | NA    | 50IDR | NA    |
| ENSG00000107807 | 90IDR | NA    | NA    |
| ENSG00000107872 | NA    | 50IDR | NA    |
| ENSG00000108292 | NA    | 50IDR | NA    |
| ENSG00000108309 | NA    | 50IDR | NA    |
| ENSG00000108312 | 90IDR | NA    | NA    |
| ENSG00000108375 | NA    | 50IDR | NA    |
| ENSG00000108417 | NA    | 50IDR | NA    |
| ENSG00000108592 | NA    | 50IDR | NA    |
| ENSG00000108641 | NA    | NA    | NA    |
| ENSG00000108786 | NA    | NA    | NA    |
| ENSG00000108829 | NA    | 50IDR | NA    |
| ENSG00000108932 | NA    | 50IDR | NA    |
| ENSG00000109111 | NA    | 50IDR | NA    |
| ENSG00000109118 | NA    | 50IDR | NA    |
| ENSG00000109163 | NA    | 50IDR | NA    |

|                 |       |       |       |
|-----------------|-------|-------|-------|
| ENSG00000109787 | 90IDR | NA    | NA    |
| ENSG00000110075 | 90IDR | NA    | NA    |
| ENSG00000110092 | NA    | NA    | NA    |
| ENSG00000110104 | 90IDR | NA    | NA    |
| ENSG00000110344 | NA    | NA    | NA    |
| ENSG00000110400 | NA    | NA    | NA    |
| ENSG00000110436 | NA    | 50IDR | NA    |
| ENSG00000111203 | 90IDR | NA    | NA    |
| ENSG00000111321 | 90IDR | NA    | NA    |
| ENSG00000111339 | 90IDR | NA    | NA    |
| ENSG00000111341 | 90IDR | NA    | NA    |
| ENSG00000111405 | NA    | NA    | NA    |
| ENSG00000111581 | 90IDR | NA    | NA    |
| ENSG00000111596 | 90IDR | NA    | NA    |
| ENSG00000111664 | 90IDR | NA    | NA    |
| ENSG00000111713 | NA    | NA    | 30IDR |
| ENSG00000111725 | 90IDR | NA    | NA    |
| ENSG00000111783 | 90IDR | NA    | NA    |
| ENSG00000111962 | NA    | NA    | NA    |
| ENSG00000112276 | NA    | NA    | NA    |
| ENSG00000112319 | NA    | 50IDR | NA    |
| ENSG00000112394 | NA    | 50IDR | NA    |
| ENSG00000112406 | NA    | NA    | NA    |
| ENSG00000112425 | NA    | NA    | NA    |
| ENSG00000112659 | 90IDR | NA    | NA    |
| ENSG00000113073 | NA    | 50IDR | NA    |
| ENSG00000113088 | NA    | NA    | NA    |
| ENSG00000113140 | 90IDR | NA    | NA    |
| ENSG00000113296 | NA    | NA    | NA    |
| ENSG00000113319 | NA    | NA    | NA    |
| ENSG00000113448 | 90IDR | NA    | NA    |
| ENSG00000113594 | 90IDR | NA    | NA    |
| ENSG00000113648 | NA    | 50IDR | NA    |
| ENSG00000113889 | NA    | 50IDR | NA    |
| ENSG00000113971 | 90IDR | NA    | NA    |
| ENSG00000114737 | NA    | 50IDR | NA    |
| ENSG00000114757 | 90IDR | NA    | NA    |
| ENSG00000114790 | 90IDR | NA    | NA    |
| ENSG00000114812 | 90IDR | NA    | NA    |
| ENSG00000115107 | NA    | NA    | NA    |
| ENSG00000115137 | 90IDR | NA    | NA    |
| ENSG00000115207 | 90IDR | NA    | NA    |
| ENSG00000115355 | 90IDR | NA    | NA    |

|                 |       |       |       |
|-----------------|-------|-------|-------|
| ENSG00000115561 | 90IDR | NA    | NA    |
| ENSG00000115738 | NA    | 50IDR | NA    |
| ENSG00000115816 | NA    | 50IDR | NA    |
| ENSG00000115850 | NA    | NA    | 30IDR |
| ENSG00000115866 | NA    | NA    | NA    |
| ENSG00000115947 | NA    | NA    | 30IDR |
| ENSG00000116133 | NA    | NA    | 30IDR |
| ENSG00000116147 | NA    | NA    | NA    |
| ENSG00000116221 | NA    | NA    | NA    |
| ENSG00000116489 | NA    | NA    | 30IDR |
| ENSG00000116539 | 90IDR | NA    | NA    |
| ENSG00000116729 | NA    | 50IDR | NA    |
| ENSG00000116996 | NA    | NA    | NA    |
| ENSG00000117091 | NA    | 50IDR | NA    |
| ENSG00000117298 | 90IDR | NA    | NA    |
| ENSG00000117505 | NA    | 50IDR | NA    |
| ENSG00000117602 | 90IDR | NA    | NA    |
| ENSG00000117834 | NA    | 50IDR | NA    |
| ENSG00000117859 | 90IDR | NA    | NA    |
| ENSG00000118058 | 90IDR | NA    | NA    |
| ENSG00000118094 | NA    | NA    | 30IDR |
| ENSG00000118276 | NA    | NA    | NA    |
| ENSG00000118503 | 90IDR | NA    | NA    |
| ENSG00000118526 | NA    | 50IDR | NA    |
| ENSG00000118849 | NA    | 50IDR | NA    |
| ENSG00000118985 | NA    | 50IDR | NA    |
| ENSG00000119042 | NA    | 50IDR | NA    |
| ENSG00000119392 | NA    | 50IDR | NA    |
| ENSG00000119686 | NA    | 50IDR | NA    |
| ENSG00000119699 | NA    | 50IDR | NA    |
| ENSG00000119729 | 90IDR | NA    | NA    |
| ENSG00000119900 | NA    | 50IDR | NA    |
| ENSG00000119906 | 90IDR | NA    | NA    |
| ENSG00000119965 | NA    | 50IDR | NA    |
| ENSG00000120008 | NA    | NA    | NA    |
| ENSG00000120458 | NA    | 50IDR | NA    |
| ENSG00000120645 | NA    | 50IDR | NA    |
| ENSG00000120729 | NA    | 50IDR | NA    |
| ENSG00000121068 | NA    | 50IDR | NA    |
| ENSG00000121410 | NA    | 50IDR | NA    |
| ENSG00000121454 | NA    | 50IDR | NA    |
| ENSG00000121764 | NA    | 50IDR | NA    |
| ENSG00000121931 | NA    | 50IDR | NA    |

|                 |       |       |       |
|-----------------|-------|-------|-------|
| ENSG00000121964 | 90IDR | NA    | NA    |
| ENSG00000122033 | NA    | 50IDR | NA    |
| ENSG00000122218 | NA    | NA    | 30IDR |
| ENSG00000122386 | 90IDR | NA    | NA    |
| ENSG00000122483 | 90IDR | NA    | NA    |
| ENSG00000122557 | 90IDR | NA    | NA    |
| ENSG00000122728 | NA    | 50IDR | NA    |
| ENSG00000123119 | NA    | 50IDR | NA    |
| ENSG00000123358 | 90IDR | NA    | NA    |
| ENSG00000123454 | NA    | NA    | 30IDR |
| ENSG00000123562 | 90IDR | NA    | NA    |
| ENSG00000123684 | NA    | NA    | NA    |
| ENSG00000123992 | 90IDR | NA    | NA    |
| ENSG00000124140 | 90IDR | NA    | NA    |
| ENSG00000124181 | NA    | NA    | 30IDR |
| ENSG00000124201 | 90IDR | NA    | NA    |
| ENSG00000124228 | NA    | 50IDR | NA    |
| ENSG00000124249 | NA    | 50IDR | NA    |
| ENSG00000125037 | NA    | 50IDR | NA    |
| ENSG00000125166 | NA    | NA    | NA    |
| ENSG00000125484 | NA    | 50IDR | NA    |
| ENSG00000125618 | NA    | 50IDR | NA    |
| ENSG00000125633 | 90IDR | NA    | NA    |
| ENSG00000125733 | NA    | 50IDR | NA    |
| ENSG00000125746 | NA    | NA    | NA    |
| ENSG00000125755 | NA    | NA    | NA    |
| ENSG00000125869 | NA    | NA    | NA    |
| ENSG00000125952 | 90IDR | NA    | NA    |
| ENSG00000125966 | NA    | NA    | NA    |
| ENSG00000125967 | NA    | 50IDR | NA    |
| ENSG00000126106 | 90IDR | NA    | NA    |
| ENSG00000126777 | 90IDR | NA    | NA    |
| ENSG00000126883 | 90IDR | NA    | NA    |
| ENSG00000127329 | NA    | NA    | NA    |
| ENSG00000127980 | NA    | NA    | NA    |
| ENSG00000128250 | NA    | NA    | NA    |
| ENSG00000128271 | NA    | 50IDR | NA    |
| ENSG00000128322 | 90IDR | NA    | NA    |
| ENSG00000128342 | 90IDR | NA    | NA    |
| ENSG00000128513 | 90IDR | NA    | NA    |
| ENSG00000128585 | NA    | 50IDR | NA    |
| ENSG00000128590 | NA    | 50IDR | NA    |
| ENSG00000128606 | NA    | 50IDR | NA    |

|                 |       |       |       |
|-----------------|-------|-------|-------|
| ENSG00000128694 | NA    | NA    | NA    |
| ENSG00000128833 | NA    | NA    | NA    |
| ENSG00000128849 | 90IDR | NA    | NA    |
| ENSG00000128923 | NA    | 50IDR | NA    |
| ENSG00000129038 | NA    | 50IDR | NA    |
| ENSG00000129250 | NA    | 50IDR | NA    |
| ENSG00000129292 | 90IDR | NA    | NA    |
| ENSG00000129473 | NA    | NA    | NA    |
| ENSG00000129484 | 90IDR | NA    | NA    |
| ENSG00000129493 | NA    | NA    | NA    |
| ENSG00000129636 | NA    | NA    | 30IDR |
| ENSG00000129654 | NA    | 50IDR | NA    |
| ENSG00000129993 | NA    | 50IDR | NA    |
| ENSG00000130332 | 90IDR | NA    | NA    |
| ENSG00000130377 | NA    | NA    | 30IDR |
| ENSG00000130768 | NA    | NA    | 30IDR |
| ENSG00000130779 | 90IDR | NA    | NA    |
| ENSG00000130813 | NA    | 50IDR | NA    |
| ENSG00000130822 | 90IDR | NA    | NA    |
| ENSG00000131389 | 90IDR | NA    | NA    |
| ENSG00000131477 | NA    | 50IDR | NA    |
| ENSG00000131626 | 90IDR | NA    | NA    |
| ENSG00000131759 | NA    | 50IDR | NA    |
| ENSG00000131795 | NA    | 50IDR | NA    |
| ENSG00000131848 | NA    | 50IDR | NA    |
| ENSG00000132305 | NA    | 50IDR | NA    |
| ENSG00000132359 | NA    | 50IDR | NA    |
| ENSG00000132361 | NA    | NA    | NA    |
| ENSG00000132405 | 90IDR | NA    | NA    |
| ENSG00000132485 | 90IDR | NA    | NA    |
| ENSG00000132623 | NA    | NA    | NA    |
| ENSG00000132640 | 90IDR | NA    | NA    |
| ENSG00000132692 | NA    | 50IDR | NA    |
| ENSG00000132846 | 90IDR | NA    | NA    |
| ENSG00000133316 | 90IDR | NA    | NA    |
| ENSG00000133392 | NA    | 50IDR | NA    |
| ENSG00000133454 | 90IDR | NA    | NA    |
| ENSG00000133466 | NA    | 50IDR | NA    |
| ENSG00000133477 | NA    | 50IDR | NA    |
| ENSG00000133488 | 90IDR | NA    | NA    |
| ENSG00000133639 | 90IDR | NA    | NA    |
| ENSG00000133657 | 90IDR | NA    | NA    |
| ENSG00000133661 | 90IDR | NA    | NA    |

|                 |       |       |       |
|-----------------|-------|-------|-------|
| ENSG00000133812 | 90IDR | NA    | NA    |
| ENSG00000134077 | 90IDR | NA    | NA    |
| ENSG00000134216 | NA    | NA    | NA    |
| ENSG00000134245 | NA    | NA    | NA    |
| ENSG00000134248 | NA    | 50IDR | NA    |
| ENSG00000134369 | 90IDR | NA    | NA    |
| ENSG00000134452 | NA    | NA    | 30IDR |
| ENSG00000134460 | NA    | 50IDR | NA    |
| ENSG00000134569 | NA    | NA    | NA    |
| ENSG00000134686 | NA    | 50IDR | NA    |
| ENSG00000134765 | NA    | 50IDR | NA    |
| ENSG00000134769 | 90IDR | NA    | NA    |
| ENSG00000134780 | NA    | 50IDR | NA    |
| ENSG00000135093 | NA    | NA    | NA    |
| ENSG00000135164 | 90IDR | NA    | NA    |
| ENSG00000135299 | 90IDR | NA    | NA    |
| ENSG00000135406 | 90IDR | NA    | NA    |
| ENSG00000135436 | 90IDR | NA    | NA    |
| ENSG00000135451 | 90IDR | NA    | NA    |
| ENSG00000135480 | NA    | 50IDR | NA    |
| ENSG00000135540 | 90IDR | NA    | NA    |
| ENSG00000135541 | 90IDR | NA    | NA    |
| ENSG00000135720 | NA    | 50IDR | NA    |
| ENSG00000135835 | 90IDR | NA    | NA    |
| ENSG00000135968 | 90IDR | NA    | NA    |
| ENSG00000135974 | NA    | 50IDR | NA    |
| ENSG00000136068 | 90IDR | NA    | NA    |
| ENSG00000136155 | 90IDR | NA    | NA    |
| ENSG00000136160 | NA    | 50IDR | NA    |
| ENSG00000136352 | 90IDR | NA    | NA    |
| ENSG00000136367 | 90IDR | NA    | NA    |
| ENSG00000136448 | 90IDR | NA    | NA    |
| ENSG00000136630 | 90IDR | NA    | NA    |
| ENSG00000136738 | NA    | 50IDR | NA    |
| ENSG00000136875 | NA    | NA    | NA    |
| ENSG00000136908 | 90IDR | NA    | NA    |
| ENSG00000136986 | NA    | 50IDR | NA    |
| ENSG00000137103 | NA    | NA    | NA    |
| ENSG00000137197 | 90IDR | NA    | NA    |
| ENSG00000137397 | NA    | 50IDR | NA    |
| ENSG00000137494 | 90IDR | NA    | NA    |
| ENSG00000137497 | 90IDR | NA    | NA    |
| ENSG00000137507 | NA    | NA    | NA    |

|                 |       |       |       |
|-----------------|-------|-------|-------|
| ENSG00000137726 | NA    | 50IDR | NA    |
| ENSG00000137731 | 90IDR | NA    | NA    |
| ENSG00000137776 | 90IDR | NA    | NA    |
| ENSG00000137807 | NA    | 50IDR | NA    |
| ENSG00000137819 | NA    | NA    | NA    |
| ENSG00000137821 | NA    | NA    | NA    |
| ENSG00000137860 | NA    | 50IDR | NA    |
| ENSG00000137868 | NA    | 50IDR | NA    |
| ENSG00000137936 | NA    | 50IDR | NA    |
| ENSG00000138061 | NA    | NA    | 30IDR |
| ENSG00000138081 | 90IDR | NA    | NA    |
| ENSG00000138136 | NA    | 50IDR | NA    |
| ENSG00000138185 | NA    | NA    | NA    |
| ENSG00000138375 | 90IDR | NA    | NA    |
| ENSG00000138592 | NA    | 50IDR | NA    |
| ENSG00000138606 | 90IDR | NA    | NA    |
| ENSG00000138640 | 90IDR | NA    | NA    |
| ENSG00000138684 | NA    | 50IDR | NA    |
| ENSG00000138735 | NA    | NA    | NA    |
| ENSG00000138792 | NA    | NA    | 30IDR |
| ENSG00000138802 | NA    | 50IDR | NA    |
| ENSG00000139112 | 90IDR | NA    | NA    |
| ENSG00000139178 | 90IDR | NA    | NA    |
| ENSG00000139220 | 90IDR | NA    | NA    |
| ENSG00000139352 | NA    | 50IDR | NA    |
| ENSG00000139549 | NA    | NA    | NA    |
| ENSG00000139656 | 90IDR | NA    | NA    |
| ENSG00000139725 | NA    | NA    | NA    |
| ENSG00000139842 | NA    | NA    | 30IDR |
| ENSG00000140067 | NA    | 50IDR | NA    |
| ENSG00000140105 | NA    | NA    | 30IDR |
| ENSG00000140416 | 90IDR | NA    | NA    |
| ENSG00000140455 | NA    | NA    | NA    |
| ENSG00000140459 | NA    | NA    | NA    |
| ENSG00000140526 | NA    | NA    | 30IDR |
| ENSG00000140548 | NA    | 50IDR | NA    |
| ENSG00000140688 | NA    | 50IDR | NA    |
| ENSG00000140939 | NA    | 50IDR | NA    |
| ENSG00000140955 | NA    | 50IDR | NA    |
| ENSG00000141027 | 90IDR | NA    | NA    |
| ENSG00000141127 | NA    | NA    | NA    |
| ENSG00000141404 | NA    | NA    | NA    |
| ENSG00000141527 | NA    | 50IDR | NA    |

|                 |       |       |    |
|-----------------|-------|-------|----|
| ENSG00000141564 | NA    | NA    | NA |
| ENSG00000141576 | NA    | 50IDR | NA |
| ENSG00000141741 | 90IDR | NA    | NA |
| ENSG00000141933 | NA    | 50IDR | NA |
| ENSG00000142002 | NA    | NA    | NA |
| ENSG00000142046 | 90IDR | NA    | NA |
| ENSG00000142192 | 90IDR | NA    | NA |
| ENSG00000142661 | NA    | NA    | NA |
| ENSG00000142694 | NA    | 50IDR | NA |
| ENSG00000142798 | 90IDR | NA    | NA |
| ENSG00000142937 | NA    | 50IDR | NA |
| ENSG00000142945 | NA    | 50IDR | NA |
| ENSG00000143179 | NA    | 50IDR | NA |
| ENSG00000143228 | NA    | NA    | NA |
| ENSG00000143373 | 90IDR | NA    | NA |
| ENSG00000143382 | NA    | 50IDR | NA |
| ENSG00000143631 | 90IDR | NA    | NA |
| ENSG00000143845 | NA    | 50IDR | NA |
| ENSG00000144283 | 90IDR | NA    | NA |
| ENSG00000144285 | NA    | 50IDR | NA |
| ENSG00000144445 | NA    | 50IDR | NA |
| ENSG00000144481 | NA    | 50IDR | NA |
| ENSG00000144554 | 90IDR | NA    | NA |
| ENSG00000144597 | 90IDR | NA    | NA |
| ENSG00000144843 | NA    | NA    | NA |
| ENSG00000144893 | NA    | 50IDR | NA |
| ENSG00000144908 | 90IDR | NA    | NA |
| ENSG00000145012 | 90IDR | NA    | NA |
| ENSG00000145335 | 90IDR | NA    | NA |
| ENSG00000145824 | NA    | 50IDR | NA |
| ENSG00000145826 | 90IDR | NA    | NA |
| ENSG00000146054 | NA    | 50IDR | NA |
| ENSG00000146094 | 90IDR | NA    | NA |
| ENSG00000146122 | NA    | 50IDR | NA |
| ENSG00000146414 | NA    | NA    | NA |
| ENSG00000146426 | 90IDR | NA    | NA |
| ENSG00000147316 | NA    | 50IDR | NA |
| ENSG00000147465 | 90IDR | NA    | NA |
| ENSG00000147536 | 90IDR | NA    | NA |
| ENSG00000147889 | 90IDR | NA    | NA |
| ENSG00000148143 | NA    | 50IDR | NA |
| ENSG00000148180 | NA    | NA    | NA |
| ENSG00000148291 | NA    | 50IDR | NA |



|                 |       |       |    |
|-----------------|-------|-------|----|
| ENSG00000148429 | NA    | 50IDR | NA |
| ENSG00000148660 | NA    | 50IDR | NA |
| ENSG00000148671 | 90IDR | NA    | NA |
| ENSG00000149187 | 90IDR | NA    | NA |
| ENSG00000149212 | 90IDR | NA    | NA |
| ENSG00000149476 | 90IDR | NA    | NA |
| ENSG00000149499 | 90IDR | NA    | NA |
| ENSG00000149582 | 90IDR | NA    | NA |
| ENSG00000149609 | 90IDR | NA    | NA |
| ENSG00000149761 | NA    | 50IDR | NA |
| ENSG00000149806 | 90IDR | NA    | NA |
| ENSG00000149968 | 90IDR | NA    | NA |
| ENSG00000150455 | 90IDR | NA    | NA |
| ENSG00000150551 | 90IDR | NA    | NA |
| ENSG00000150667 | NA    | 50IDR | NA |
| ENSG00000150672 | 90IDR | NA    | NA |
| ENSG00000150753 | 90IDR | NA    | NA |
| ENSG00000150756 | 90IDR | NA    | NA |
| ENSG00000150776 | 90IDR | NA    | NA |
| ENSG00000150967 | NA    | 50IDR | NA |
| ENSG00000151012 | NA    | 50IDR | NA |
| ENSG00000151067 | 90IDR | NA    | NA |
| ENSG00000151092 | 90IDR | NA    | NA |
| ENSG00000151353 | 90IDR | NA    | NA |
| ENSG00000151474 | NA    | 50IDR | NA |
| ENSG00000151694 | NA    | 50IDR | NA |
| ENSG00000151702 | 90IDR | NA    | NA |
| ENSG00000151952 | NA    | 50IDR | NA |
| ENSG00000152022 | NA    | 50IDR | NA |
| ENSG00000152193 | 90IDR | NA    | NA |
| ENSG00000152256 | 90IDR | NA    | NA |
| ENSG00000152601 | 90IDR | NA    | NA |
| ENSG00000152779 | 90IDR | NA    | NA |
| ENSG00000152894 | 90IDR | NA    | NA |
| ENSG00000153048 | NA    | 50IDR | NA |
| ENSG00000153237 | 90IDR | NA    | NA |
| ENSG00000153310 | 90IDR | NA    | NA |
| ENSG00000153822 | NA    | NA    | NA |
| ENSG00000154146 | 90IDR | NA    | NA |
| ENSG00000154237 | 90IDR | NA    | NA |
| ENSG00000154258 | NA    | NA    | NA |
| ENSG00000154274 | 90IDR | NA    | NA |
| ENSG00000154277 | 90IDR | NA    | NA |

|                 |       |       |       |
|-----------------|-------|-------|-------|
| ENSG00000154655 | NA    | NA    | NA    |
| ENSG00000154767 | 90IDR | NA    | NA    |
| ENSG00000154783 | NA    | 50IDR | NA    |
| ENSG00000154864 | NA    | 50IDR | NA    |
| ENSG00000155016 | NA    | NA    | 30IDR |
| ENSG00000155096 | 90IDR | NA    | NA    |
| ENSG00000155097 | NA    | NA    | 30IDR |
| ENSG00000155380 | NA    | 50IDR | NA    |
| ENSG00000155657 | 90IDR | NA    | NA    |
| ENSG00000155666 | NA    | NA    | NA    |
| ENSG00000155792 | NA    | 50IDR | NA    |
| ENSG00000156103 | NA    | NA    | NA    |
| ENSG00000156113 | NA    | 50IDR | NA    |
| ENSG00000157017 | 90IDR | NA    | NA    |
| ENSG00000157077 | NA    | 50IDR | NA    |
| ENSG00000157193 | 90IDR | NA    | NA    |
| ENSG00000157445 | 90IDR | NA    | NA    |
| ENSG00000157873 | 90IDR | NA    | NA    |
| ENSG00000158062 | 90IDR | NA    | NA    |
| ENSG00000158156 | NA    | 50IDR | NA    |
| ENSG00000159110 | NA    | 50IDR | NA    |
| ENSG00000159251 | NA    | NA    | 30IDR |
| ENSG00000159261 | NA    | 50IDR | NA    |
| ENSG00000159307 | NA    | 50IDR | NA    |
| ENSG00000159322 | NA    | NA    | NA    |
| ENSG00000159363 | NA    | 50IDR | NA    |
| ENSG00000159496 | NA    | 50IDR | NA    |
| ENSG00000159596 | NA    | 50IDR | NA    |
| ENSG00000159658 | NA    | 50IDR | NA    |
| ENSG00000159692 | NA    | 50IDR | NA    |
| ENSG00000160050 | 90IDR | NA    | NA    |
| ENSG00000160051 | NA    | 50IDR | NA    |
| ENSG00000160188 | NA    | 50IDR | NA    |
| ENSG00000160226 | NA    | 50IDR | NA    |
| ENSG00000160294 | 90IDR | NA    | NA    |
| ENSG00000160401 | 90IDR | NA    | NA    |
| ENSG00000160404 | 90IDR | NA    | NA    |
| ENSG00000160678 | 90IDR | NA    | NA    |
| ENSG00000160679 | 90IDR | NA    | NA    |
| ENSG00000160716 | NA    | NA    | NA    |
| ENSG00000160752 | NA    | NA    | 30IDR |
| ENSG00000160753 | NA    | 50IDR | NA    |
| ENSG00000161381 | NA    | 50IDR | NA    |

|                 |       |       |       |
|-----------------|-------|-------|-------|
| ENSG00000161544 | NA    | NA    | NA    |
| ENSG00000161638 | NA    | 50IDR | NA    |
| ENSG00000161664 | NA    | NA    | NA    |
| ENSG00000161714 | NA    | NA    | NA    |
| ENSG00000161849 | NA    | NA    | NA    |
| ENSG00000161929 | 90IDR | NA    | NA    |
| ENSG00000162063 | NA    | NA    | NA    |
| ENSG00000162069 | 90IDR | NA    | NA    |
| ENSG00000162086 | NA    | 50IDR | NA    |
| ENSG00000162227 | 90IDR | NA    | NA    |
| ENSG00000162298 | NA    | 50IDR | NA    |
| ENSG00000162383 | NA    | 50IDR | NA    |
| ENSG00000162430 | NA    | NA    | NA    |
| ENSG00000162494 | NA    | NA    | NA    |
| ENSG00000162517 | 90IDR | NA    | NA    |
| ENSG00000162571 | NA    | 50IDR | NA    |
| ENSG00000162775 | NA    | 50IDR | NA    |
| ENSG00000163041 | NA    | 50IDR | NA    |
| ENSG00000163166 | 90IDR | NA    | NA    |
| ENSG00000163214 | 90IDR | NA    | NA    |
| ENSG00000163281 | NA    | NA    | 30IDR |
| ENSG00000163395 | NA    | 50IDR | NA    |
| ENSG00000163435 | NA    | 50IDR | NA    |
| ENSG00000163485 | NA    | 50IDR | NA    |
| ENSG00000163517 | 90IDR | NA    | NA    |
| ENSG00000163637 | NA    | 50IDR | NA    |
| ENSG00000163689 | 90IDR | NA    | NA    |
| ENSG00000163704 | 90IDR | NA    | NA    |
| ENSG00000163872 | 90IDR | NA    | NA    |
| ENSG00000163879 | NA    | 50IDR | NA    |
| ENSG00000163947 | 90IDR | NA    | NA    |
| ENSG00000164010 | NA    | 50IDR | NA    |
| ENSG00000164023 | 90IDR | NA    | NA    |
| ENSG00000164032 | NA    | 50IDR | NA    |
| ENSG00000164068 | 90IDR | NA    | NA    |
| ENSG00000164107 | 90IDR | NA    | NA    |
| ENSG00000164109 | 90IDR | NA    | NA    |
| ENSG00000164114 | 90IDR | NA    | NA    |
| ENSG00000164125 | NA    | 50IDR | NA    |
| ENSG00000164134 | NA    | 50IDR | NA    |
| ENSG00000164284 | NA    | 50IDR | NA    |
| ENSG00000164506 | NA    | 50IDR | NA    |
| ENSG00000164591 | 90IDR | NA    | NA    |

|                 |       |       |       |
|-----------------|-------|-------|-------|
| ENSG00000164620 | 90IDR | NA    | NA    |
| ENSG00000164654 | 90IDR | NA    | NA    |
| ENSG00000164930 | NA    | 50IDR | NA    |
| ENSG00000165072 | NA    | NA    | 30IDR |
| ENSG00000165125 | 90IDR | NA    | NA    |
| ENSG00000165152 | NA    | NA    | NA    |
| ENSG00000165392 | NA    | NA    | NA    |
| ENSG00000165424 | 90IDR | NA    | NA    |
| ENSG00000165494 | 90IDR | NA    | NA    |
| ENSG00000165512 | 90IDR | NA    | NA    |
| ENSG00000165646 | NA    | 50IDR | NA    |
| ENSG00000165698 | NA    | NA    | NA    |
| ENSG00000165795 | NA    | NA    | NA    |
| ENSG00000166086 | 90IDR | NA    | NA    |
| ENSG00000166164 | NA    | 50IDR | NA    |
| ENSG00000166233 | NA    | NA    | NA    |
| ENSG00000166340 | 90IDR | NA    | NA    |
| ENSG00000166348 | 90IDR | NA    | NA    |
| ENSG00000166484 | NA    | 50IDR | NA    |
| ENSG00000166546 | 90IDR | NA    | NA    |
| ENSG00000166548 | NA    | NA    | NA    |
| ENSG00000166582 | NA    | 50IDR | NA    |
| ENSG00000166598 | 90IDR | NA    | NA    |
| ENSG00000166793 | 90IDR | NA    | NA    |
| ENSG00000166897 | NA    | 50IDR | NA    |
| ENSG00000166960 | NA    | 50IDR | NA    |
| ENSG00000167004 | 90IDR | NA    | NA    |
| ENSG00000167094 | NA    | 50IDR | NA    |
| ENSG00000167106 | 90IDR | NA    | NA    |
| ENSG00000167131 | 90IDR | NA    | NA    |
| ENSG00000167173 | NA    | 50IDR | NA    |
| ENSG00000167208 | 90IDR | NA    | NA    |
| ENSG00000167230 | NA    | 50IDR | NA    |
| ENSG00000167283 | 90IDR | NA    | NA    |
| ENSG00000167461 | NA    | NA    | NA    |
| ENSG00000167524 | NA    | 50IDR | NA    |
| ENSG00000167536 | NA    | NA    | NA    |
| ENSG00000167580 | NA    | 50IDR | NA    |
| ENSG00000167653 | 90IDR | NA    | NA    |
| ENSG00000167671 | NA    | 50IDR | NA    |
| ENSG00000167754 | NA    | NA    | NA    |
| ENSG00000167755 | NA    | NA    | NA    |
| ENSG00000167840 | NA    | 50IDR | NA    |

|                 |       |       |    |
|-----------------|-------|-------|----|
| ENSG00000167863 | 90IDR | NA    | NA |
| ENSG00000167978 | 90IDR | NA    | NA |
| ENSG00000168032 | NA    | 50IDR | NA |
| ENSG00000168040 | NA    | 50IDR | NA |
| ENSG00000168060 | 90IDR | NA    | NA |
| ENSG00000168079 | NA    | 50IDR | NA |
| ENSG00000168152 | 90IDR | NA    | NA |
| ENSG00000168237 | NA    | NA    | NA |
| ENSG00000168385 | 90IDR | NA    | NA |
| ENSG00000168394 | NA    | NA    | NA |
| ENSG00000168481 | NA    | 50IDR | NA |
| ENSG00000168497 | NA    | 50IDR | NA |
| ENSG00000168505 | 90IDR | NA    | NA |
| ENSG00000168517 | 90IDR | NA    | NA |
| ENSG00000168539 | NA    | 50IDR | NA |
| ENSG00000168575 | 90IDR | NA    | NA |
| ENSG00000168589 | 90IDR | NA    | NA |
| ENSG00000168631 | 90IDR | NA    | NA |
| ENSG00000168679 | 90IDR | NA    | NA |
| ENSG00000168734 | 90IDR | NA    | NA |
| ENSG00000168743 | 90IDR | NA    | NA |
| ENSG00000168748 | 90IDR | NA    | NA |
| ENSG00000168763 | NA    | 50IDR | NA |
| ENSG00000168811 | NA    | 50IDR | NA |
| ENSG00000168818 | NA    | 50IDR | NA |
| ENSG00000168913 | 90IDR | NA    | NA |
| ENSG00000168958 | 90IDR | NA    | NA |
| ENSG00000169021 | NA    | NA    | NA |
| ENSG00000169031 | 90IDR | NA    | NA |
| ENSG00000169032 | NA    | NA    | NA |
| ENSG00000169136 | NA    | 50IDR | NA |
| ENSG00000169231 | NA    | 50IDR | NA |
| ENSG00000169432 | NA    | 50IDR | NA |
| ENSG00000169499 | NA    | 50IDR | NA |
| ENSG00000169564 | NA    | NA    | NA |
| ENSG00000169740 | NA    | 50IDR | NA |
| ENSG00000169758 | NA    | 50IDR | NA |
| ENSG00000169894 | 90IDR | NA    | NA |
| ENSG00000169953 | NA    | 50IDR | NA |
| ENSG00000170054 | NA    | 50IDR | NA |
| ENSG00000170231 | 90IDR | NA    | NA |
| ENSG00000170255 | NA    | 50IDR | NA |
| ENSG00000170445 | 90IDR | NA    | NA |

|                 |       |       |    |
|-----------------|-------|-------|----|
| ENSG00000170454 | NA    | 50IDR | NA |
| ENSG00000170473 | 90IDR | NA    | NA |
| ENSG00000170486 | NA    | 50IDR | NA |
| ENSG00000170776 | 90IDR | NA    | NA |
| ENSG00000171103 | NA    | 50IDR | NA |
| ENSG00000171130 | NA    | 50IDR | NA |
| ENSG00000171401 | NA    | 50IDR | NA |
| ENSG00000171408 | NA    | NA    | NA |
| ENSG00000171806 | NA    | 50IDR | NA |
| ENSG00000171824 | NA    | NA    | NA |
| ENSG00000171840 | NA    | 50IDR | NA |
| ENSG00000171865 | NA    | NA    | NA |
| ENSG00000171914 | NA    | 50IDR | NA |
| ENSG00000171940 | 90IDR | NA    | NA |
| ENSG00000172007 | NA    | NA    | NA |
| ENSG00000172071 | NA    | 50IDR | NA |
| ENSG00000172349 | 90IDR | NA    | NA |
| ENSG00000172379 | NA    | 50IDR | NA |
| ENSG00000172425 | 90IDR | NA    | NA |
| ENSG00000172468 | NA    | 50IDR | NA |
| ENSG00000172548 | 90IDR | NA    | NA |
| ENSG00000172575 | NA    | NA    | NA |
| ENSG00000172661 | 90IDR | NA    | NA |
| ENSG00000172809 | 90IDR | NA    | NA |
| ENSG00000172955 | 90IDR | NA    | NA |
| ENSG00000173088 | NA    | 50IDR | NA |
| ENSG00000173163 | 90IDR | NA    | NA |
| ENSG00000173171 | NA    | 50IDR | NA |
| ENSG00000173210 | NA    | 50IDR | NA |
| ENSG00000173273 | 90IDR | NA    | NA |
| ENSG00000173276 | 90IDR | NA    | NA |
| ENSG00000173464 | NA    | 50IDR | NA |
| ENSG00000173567 | 90IDR | NA    | NA |
| ENSG00000173621 | NA    | NA    | NA |
| ENSG00000174306 | 90IDR | NA    | NA |
| ENSG00000174500 | 90IDR | NA    | NA |
| ENSG00000174516 | 90IDR | NA    | NA |
| ENSG00000174586 | 90IDR | NA    | NA |
| ENSG00000174804 | NA    | NA    | NA |
| ENSG00000174871 | NA    | 50IDR | NA |
| ENSG00000174891 | 90IDR | NA    | NA |
| ENSG00000174903 | NA    | NA    | NA |
| ENSG00000174943 | NA    | NA    | NA |

|                 |       |       |       |
|-----------------|-------|-------|-------|
| ENSG00000174989 | NA    | NA    | 30IDR |
| ENSG00000174996 | 90IDR | NA    | NA    |
| ENSG00000175077 | NA    | NA    | NA    |
| ENSG00000175324 | 90IDR | NA    | NA    |
| ENSG00000175538 | 90IDR | NA    | NA    |
| ENSG00000175792 | NA    | NA    | NA    |
| ENSG00000175928 | NA    | NA    | 30IDR |
| ENSG00000176087 | NA    | 50IDR | NA    |
| ENSG00000176358 | 90IDR | NA    | NA    |
| ENSG00000176390 | NA    | NA    | 30IDR |
| ENSG00000176393 | NA    | NA    | NA    |
| ENSG00000176697 | NA    | 50IDR | NA    |
| ENSG00000177000 | 90IDR | NA    | NA    |
| ENSG00000177463 | 90IDR | NA    | NA    |
| ENSG00000177752 | NA    | 50IDR | NA    |
| ENSG00000177971 | 90IDR | NA    | NA    |
| ENSG00000178363 | NA    | 50IDR | NA    |
| ENSG00000178826 | 90IDR | NA    | NA    |
| ENSG00000178860 | NA    | 50IDR | NA    |
| ENSG00000178965 | NA    | 50IDR | NA    |
| ENSG00000179057 | NA    | NA    | NA    |
| ENSG00000179119 | 90IDR | NA    | NA    |
| ENSG00000179151 | NA    | NA    | NA    |
| ENSG00000179388 | 90IDR | NA    | NA    |
| ENSG00000179407 | NA    | 50IDR | NA    |
| ENSG00000179455 | NA    | 50IDR | NA    |
| ENSG00000179583 | NA    | 50IDR | NA    |
| ENSG00000179889 | NA    | NA    | NA    |
| ENSG00000180228 | 90IDR | NA    | NA    |
| ENSG00000180398 | 90IDR | NA    | NA    |
| ENSG00000180957 | 90IDR | NA    | NA    |
| ENSG00000181092 | NA    | 50IDR | NA    |
| ENSG00000181350 | NA    | 50IDR | NA    |
| ENSG00000181418 | 90IDR | NA    | NA    |
| ENSG00000181929 | 90IDR | NA    | NA    |
| ENSG00000182107 | NA    | NA    | NA    |
| ENSG00000182150 | 90IDR | NA    | NA    |
| ENSG00000182168 | NA    | NA    | NA    |
| ENSG00000182253 | NA    | 50IDR | NA    |
| ENSG00000182346 | 90IDR | NA    | NA    |
| ENSG00000182901 | NA    | 50IDR | NA    |
| ENSG00000182950 | NA    | 50IDR | NA    |
| ENSG00000183092 | NA    | 50IDR | NA    |

|                 |       |       |       |
|-----------------|-------|-------|-------|
| ENSG00000183475 | NA    | NA    | 30IDR |
| ENSG00000183549 | NA    | NA    | NA    |
| ENSG00000183569 | NA    | NA    | NA    |
| ENSG00000183682 | NA    | NA    | NA    |
| ENSG00000183833 | 90IDR | NA    | NA    |
| ENSG00000183963 | 90IDR | NA    | NA    |
| ENSG00000184154 | 90IDR | NA    | NA    |
| ENSG00000184224 | NA    | 50IDR | NA    |
| ENSG00000184436 | NA    | 50IDR | NA    |
| ENSG00000184619 | NA    | NA    | NA    |
| ENSG00000184708 | 90IDR | NA    | NA    |
| ENSG00000184743 | NA    | 50IDR | NA    |
| ENSG00000184897 | 90IDR | NA    | NA    |
| ENSG00000184922 | NA    | 50IDR | NA    |
| ENSG00000184923 | 90IDR | NA    | NA    |
| ENSG00000184937 | 90IDR | NA    | NA    |
| ENSG00000184983 | NA    | NA    | NA    |
| ENSG00000185052 | NA    | 50IDR | NA    |
| ENSG00000185453 | NA    | NA    | NA    |
| ENSG00000185627 | 90IDR | NA    | NA    |
| ENSG00000185669 | NA    | 50IDR | NA    |
| ENSG00000185761 | NA    | 50IDR | NA    |
| ENSG00000186049 | NA    | 50IDR | NA    |
| ENSG00000186187 | NA    | 50IDR | NA    |
| ENSG00000186635 | NA    | 50IDR | NA    |
| ENSG00000186642 | 90IDR | NA    | NA    |
| ENSG00000186868 | 90IDR | NA    | NA    |
| ENSG00000187024 | NA    | NA    | NA    |
| ENSG00000187144 | 90IDR | NA    | NA    |
| ENSG00000187537 | NA    | 50IDR | NA    |
| ENSG00000187726 | NA    | NA    | NA    |
| ENSG00000187806 | NA    | 50IDR | NA    |
| ENSG00000187860 | NA    | 50IDR | NA    |
| ENSG00000187942 | NA    | 50IDR | NA    |
| ENSG00000188001 | 90IDR | NA    | NA    |
| ENSG00000188089 | NA    | NA    | NA    |
| ENSG00000188227 | NA    | 50IDR | NA    |
| ENSG00000188312 | 90IDR | NA    | NA    |
| ENSG00000188316 | NA    | NA    | NA    |
| ENSG00000188385 | NA    | 50IDR | NA    |
| ENSG00000188649 | NA    | 50IDR | NA    |
| ENSG00000188779 | NA    | 50IDR | NA    |
| ENSG00000188820 | NA    | 50IDR | NA    |



|                 |       |       |       |
|-----------------|-------|-------|-------|
| ENSG00000188997 | 90IDR | NA    | NA    |
| ENSG00000189337 | 90IDR | NA    | NA    |
| ENSG00000196345 | 90IDR | NA    | NA    |
| ENSG00000196371 | NA    | 50IDR | NA    |
| ENSG00000196465 | NA    | 50IDR | NA    |
| ENSG00000196504 | 90IDR | NA    | NA    |
| ENSG00000196526 | NA    | 50IDR | NA    |
| ENSG00000196549 | 90IDR | NA    | NA    |
| ENSG00000196562 | NA    | NA    | NA    |
| ENSG00000196591 | 90IDR | NA    | NA    |
| ENSG00000196611 | NA    | NA    | 30IDR |
| ENSG00000196700 | NA    | 50IDR | NA    |
| ENSG00000196821 | NA    | 50IDR | NA    |
| ENSG00000196860 | NA    | NA    | NA    |
| ENSG00000196987 | 90IDR | NA    | NA    |
| ENSG00000197021 | NA    | NA    | 30IDR |
| ENSG00000197119 | 90IDR | NA    | NA    |
| ENSG00000197208 | NA    | 50IDR | NA    |
| ENSG00000197361 | NA    | 50IDR | NA    |
| ENSG00000197375 | NA    | 50IDR | NA    |
| ENSG00000197536 | 90IDR | NA    | NA    |
| ENSG00000197971 | 90IDR | NA    | NA    |
| ENSG00000198010 | NA    | 50IDR | NA    |
| ENSG00000198055 | 90IDR | NA    | NA    |
| ENSG00000198062 | NA    | 50IDR | NA    |
| ENSG00000198105 | 90IDR | NA    | NA    |
| ENSG00000198382 | 90IDR | NA    | NA    |
| ENSG00000198700 | NA    | 50IDR | NA    |
| ENSG00000198740 | NA    | 50IDR | NA    |
| ENSG00000198742 | NA    | NA    | NA    |
| ENSG00000198771 | 90IDR | NA    | NA    |
| ENSG00000198814 | 90IDR | NA    | NA    |
| ENSG00000198844 | NA    | 50IDR | NA    |
| ENSG00000198900 | NA    | 50IDR | NA    |
| ENSG00000198911 | NA    | 50IDR | NA    |
| ENSG00000198964 | NA    | NA    | NA    |
| ENSG00000203818 | NA    | 50IDR | NA    |
| ENSG00000204070 | 90IDR | NA    | NA    |
| ENSG00000204188 | 90IDR | NA    | NA    |
| ENSG00000204264 | NA    | NA    | NA    |
| ENSG00000204291 | NA    | 50IDR | NA    |
| ENSG00000204539 | 90IDR | NA    | NA    |
| ENSG00000204599 | 90IDR | NA    | NA    |

|                 |       |       |       |
|-----------------|-------|-------|-------|
| ENSG00000204616 | NA    | 50IDR | NA    |
| ENSG00000204843 | 90IDR | NA    | NA    |
| ENSG00000205277 | 90IDR | NA    | NA    |
| ENSG00000205838 | 90IDR | NA    | NA    |
| ENSG00000206297 | NA    | NA    | NA    |
| ENSG00000206298 | NA    | NA    | NA    |
| ENSG00000206409 | NA    | 50IDR | NA    |
| ENSG00000206432 | NA    | 50IDR | NA    |
| ENSG00000206460 | 90IDR | NA    | NA    |
| ENSG00000206495 | 90IDR | NA    | NA    |
| ENSG00000206502 | NA    | 50IDR | NA    |
| ENSG00000213214 | 90IDR | NA    | NA    |
| ENSG00000213658 | 90IDR | NA    | NA    |
| ENSG00000213892 | NA    | NA    | 30IDR |
| ENSG00000213983 | NA    | NA    | NA    |
| ENSG00000214026 | NA    | 50IDR | NA    |
| ENSG00000214102 | NA    | 50IDR | NA    |
| ENSG00000214188 | NA    | NA    | NA    |
| ENSG00000214517 | NA    | 50IDR | NA    |
| ENSG00000214575 | NA    | 50IDR | NA    |
| ENSG00000214681 | NA    | NA    | NA    |
| ENSG00000214688 | 90IDR | NA    | NA    |
| ENSG00000214814 | NA    | NA    | NA    |
| ENSG00000214860 | NA    | 50IDR | NA    |
| ENSG00000215193 | NA    | NA    | NA    |
| ENSG00000215910 | 90IDR | NA    | NA    |
| ENSG00000222014 | NA    | NA    | NA    |
| ENSG00000222036 | NA    | 50IDR | NA    |
| ENSG00000223531 | NA    | 50IDR | NA    |
| ENSG00000223874 | 90IDR | NA    | NA    |
| ENSG00000224168 | NA    | 50IDR | NA    |
| ENSG00000224212 | NA    | NA    | NA    |
| ENSG00000224290 | NA    | 50IDR | NA    |
| ENSG00000224420 | NA    | 50IDR | NA    |
| ENSG00000224542 | NA    | NA    | NA    |
| ENSG00000224730 | NA    | 50IDR | NA    |
| ENSG00000224748 | NA    | NA    | NA    |
| ENSG00000224859 | NA    | 50IDR | NA    |
| ENSG00000224994 | 90IDR | NA    | NA    |
| ENSG00000225130 | NA    | 50IDR | NA    |
| ENSG00000226173 | NA    | NA    | NA    |
| ENSG00000226201 | NA    | NA    | NA    |
| ENSG00000226215 | NA    | 50IDR | NA    |

|                 |       |       |    |
|-----------------|-------|-------|----|
| ENSG00000226321 | 90IDR | NA    | NA |
| ENSG00000226402 | NA    | 50IDR | NA |
| ENSG00000226437 | 90IDR | NA    | NA |
| ENSG00000227567 | NA    | 50IDR | NA |
| ENSG00000227816 | NA    | NA    | NA |
| ENSG00000229284 | 90IDR | NA    | NA |
| ENSG00000229929 | 90IDR | NA    | NA |
| ENSG00000230034 | NA    | NA    | NA |
| ENSG00000230308 | 90IDR | NA    | NA |
| ENSG00000230669 | NA    | NA    | NA |
| ENSG00000230705 | NA    | NA    | NA |
| ENSG00000231631 | NA    | NA    | NA |
| ENSG00000231974 | NA    | 50IDR | NA |
| ENSG00000232251 | 90IDR | NA    | NA |
| ENSG00000232308 | 90IDR | NA    | NA |
| ENSG00000232367 | NA    | NA    | NA |
| ENSG00000232839 | 90IDR | NA    | NA |
| ENSG00000232859 | 90IDR | NA    | NA |
| ENSG00000233573 | NA    | 50IDR | NA |
| ENSG00000233795 | NA    | 50IDR | NA |
| ENSG00000234224 | NA    | NA    | NA |
| ENSG00000235176 | NA    | 50IDR | NA |
| ENSG00000235443 | NA    | 50IDR | NA |
| ENSG00000235715 | NA    | NA    | NA |
| ENSG00000235754 | NA    | 50IDR | NA |
| ENSG00000236443 | NA    | NA    | NA |
| ENSG00000236808 | NA    | 50IDR | NA |
| ENSG00000236939 | 90IDR | NA    | NA |
| ENSG00000236949 | NA    | 50IDR | NA |
| ENSG00000237114 | 90IDR | NA    | NA |
| ENSG00000237123 | 90IDR | NA    | NA |
| ENSG00000237165 | 90IDR | NA    | NA |
| ENSG00000237515 | NA    | 50IDR | NA |
| ENSG00000239305 | NA    | 50IDR | NA |
| ENSG00000239857 | NA    | 50IDR | NA |
| ENSG00000241837 | 90IDR | NA    | NA |
| ENSG00000244274 | 90IDR | NA    | NA |
| ENSG00000244607 | NA    | 50IDR | NA |
| ENSG00000254206 | 90IDR | NA    | NA |
| ENSG00000254986 | 90IDR | NA    | NA |
| ENSG00000255181 | NA    | 50IDR | NA |
| ENSG00000256453 | NA    | NA    | NA |
| ENSG00000256530 | 90IDR | NA    | NA |

|                 |       |       |    |
|-----------------|-------|-------|----|
| ENSG00000257327 | 90IDR | NA    | NA |
| ENSG00000257955 | NA    | 50IDR | NA |
