# Supplementary material
Source: PubMed Central journal article supplement (PMC7610982)
Supplement: EMS126982-supplement-Supplementary_Table9.pdf [file EMS126982-supplement-Supplementary_Table9.pdf]

| abbreviation | description                                                                       |
|--------------|-----------------------------------------------------------------------------------|
| AAV9         | adeno-associated virus serotype-9                                                 |
| AD           | Alzheimer's disease                                                               |
| Allen B.I.   | Allen Brain Institute                                                             |
| Braak-stage  | staging of AD-associated neurofibrillary tangle pathology proposed by Braak       |
| CAGE         | Cap Analysis of Gene Expression                                                   |
| CDS          | protein coding sequence                                                           |
| CMV          | cytomegalovirus promoter                                                          |
| CNS          | central nervous system                                                            |
| CORE-SINE    | conserved central core of MIR SINE element                                        |
| FL           | full-length                                                                       |
| flip         | 5'UTR overlapping region flipped                                                  |
| Fluc         | firefly luciferase                                                                |
| FPKM         | Fragments Per Kilobase of transcript per Million mapped reads                     |
| FTLD         | frontotemporal dementia                                                           |
| HCI          | High Content Imaging                                                              |
| hub-IDP      | intrinsically disordered protein with high number of protein interactors          |
| IDP          | intrinsically disordered protein                                                  |
| IDR          | intrinsically disordered region                                                   |
| IHC          | Immunohistochemistry                                                              |
| iPSC         | induced-pluripotent stem cell                                                     |
| IRES         | internal ribosome entry site                                                      |
| IVTT         | In vitro Transcription-Translation assay                                          |
| LD           | linkage disequilibrium                                                            |
| lncRNA       | long non-coding RNA                                                               |
| LV           | lentivirus                                                                        |
| MAPT         | Microtubule-Associated Protein Tau                                                |
| Mflip        | MIR flipped                                                                       |
| miniNAT      | minimized short tau natural antisense transcript                                  |
| MIR          | mammalian-wide interspersed repeat element                                        |
| MIR-NAT      | natural antisense transcripts with embedded MIR repeat                            |
| MOI          | multiplicity of infection                                                         |
| mTOP         | bicistronic Renilla-tau-firefly luciferase reporter with a mutant TOP motif       |
| MutΔ1        | mutant deleted of MIR motif-1                                                     |
| MutΔ2        | mutant deleted of MIR motif-2                                                     |
| MutΔ3        | mutant deleted of MIR motif-3                                                     |
| NAT          | natural antisense transcripts                                                     |
| NDD          | neurodegenerative diseases                                                        |
| NDD-genes    | neurodegenerative diseases-associated genes                                       |
| ORF          | open reading frame                                                                |
| PD           | Parkinson's disease                                                               |
| PEST         | Proline(S), Glutamic acid(E), Serine(S), Threonine(T)-rich peptide sequences      |
| PPI          | protein-protein interaction                                                       |
| pRF          | bicistronic Renilla-firefly luciferase reporter negative control plasmid          |
| pRTF         | bicistronic Renilla-tau-firefly luciferase reporter plasmid                       |
| pRTFover     | bicistronic Renilla-tau-firefly luciferase reporter limited to overlapping region |
| pRTFA        | bicistronic Renilla-tau-firefly luciferase reporter deleted of overlapping region |
| PSP          | Progressive Supranuclear Palsy                                                    |
| pTF          | monocistronic tau firefly luciferase reporter plasmid                             |
| RBS          | ribosome binding site                                                             |
| RFP          | ribosome footprint                                                                |
| Rluc         | Renilla luciferase                                                                |
| ROS-MAP      | Religious Orders Study and Rush Memory and Aging Project                          |
| RPKM         | Reads Per Kilobase of transcript per Million mapped reads                         |
| S-AS         | sense-antisense pair                                                              |
| shRNA        | short hairpin RNA                                                                 |
| SINE         | Short Interspersed Nuclear Element                                                |
| siRNA        | small interfering RNA                                                             |
| sm-FISH      | single-molecule RNA fluorescent in situ hybridization                             |
| t-NAT        | tau natural antisense transcript                                                  |
| TE           | transposable element                                                              |
| TOP          | 5'-terminal oligopyrimidine                                                       |
| TPM          | Transcripts Per Kilobase Million mapped reads                                     |
| UTR          | untranslated region                                                               |
| ΔM           | deletion of whole MIR                                                             |
| ΔM1          | partial deletion of MIR                                                           |
